# Supplementary material for: Genome-wide analysis of FRF gene family and functional identification of HvFRF9 under drought stress in barley
Source: Front Plant Sci. 2024 Jan 24;15:1347842. doi: 10.3389/fpls.2024.1347842 (PMC10847358; doi:10.3389/fpls.2024.1347842)
Supplement: Supplementary file 5 [file Table_1.xlsx]

## Sheet: Table S1
Table S1. Primer information used in this study
Primer name	Primer sequence
RT-HvFRF1-F	TCACTGACAGGATACCTACGA
RT-HvFRF1-R	TGTATTTGTGCTCAGCTTGGA
RT-HvFRF2-F	TGGTCGCTGACAGGATACC
RT-HvFRF2-R	TCAAGCTGTTGACTGCTTTTG
RT-HvFRF9-F	CTATTGCCCCTGAGAGGAGT
RT-HvFRF9-R	GAGAGGGTGGTTATGGTTGTC
RT-HvFRF14-F	AGTTTGTGAAGTTGCTTCATTC
RT-HvFRF14-R	TGAACCATCAATCCAGTAATGC
RT-HvFRF22-F	ATGTTTGTGAAGCGGAGAGA
RT-HvFRF22-R	AGGTTCTAGATTGCACGAATGA
HvFRF9-F	GGTTTTGTATGTTATGCAGATCGTGAGAC
HvFRF9-R	CCAAACTGAATTGACTGTCCATGGTTG
In-situ-HvFRF9-F	TGTGAAGCGAAGAGATAATGC
In-situ-HvFRF9-R	GCTGAACCATCAATCCAGTAA
Hv18S-F	GGTAATTCCAGCTCCAAT
Hv18S-R	GTTTATGGTTGAGACTAG
HvFRF9-OE-F	CGACTCTAGTCTAGAAAGCTTATGCCGGAGGTGATGTCC
HvFRF9-OE-R	CGATCGGGGAAATTCGAGCTCTTATACCAATAAACGGGC
RT-HvFRF9-F1	TTCCGGGCTGAGCACAAATA
RT-HvFRF9-F2	TAAGCCCTTCTCGCTGAACC
AtACTIN-F	AGGAAGGATCTGTACGGTAAC
AtACTIN-R	TTCTGTGAACGATTCCTGGAC

## Sheet: Table S2
Table S2. The list of transcription factors which targeted to HvFRF genes in barley.
Pattern name	Family	Sequence name	Start	Stop	Strand	Score	P-value	Q-value	Matched sequence
MLOC_70754	AP2	HvFRF1	507	526	+	19.4744	1.16e-07	0.00512	TAAAAAAAAGAAGAGACAGA
MLOC_70754	AP2	HvFRF7	347	366	-	19.3974	1.25e-07	0.00512	AATAAAAAAAGTAAAAAAAG
MLOC_70754	AP2	HvFRF1	525	544	+	18.8846	2.03e-07	0.00522	GAAAACAAGAAAAAAAAACA
MLOC_70754	AP2	HvFRF1	505	524	+	18.5385	2.77e-07	0.00522	CGTAAAAAAAAGAAGAGACA
MLOC_70754	AP2	HvFRF1	1798	1817	-	18.1795	3.79e-07	0.00522	GGTGCAAAGAAAAAGAGAGA
MLOC_70754	AP2	HvFRF7	342	361	-	18.1154	4.01e-07	0.00522	AAAAAGTAAAAAAAGAAACA
MLOC_70754	AP2	HvFRF5	1438	1457	+	17.9872	4.46e-07	0.00522	AATGAAATGAAAAGAAGAAG
MLOC_70754	AP2	HvFRF1	527	546	+	17.6538	5.89e-07	0.00603	AAACAAGAAAAAAAAACAGA
MLOC_70754	AP2	HvFRF6	1107	1126	+	17.4615	6.89e-07	0.00627	GAAAAGAAAGAAGAAACAAA
MLOC_70754	AP2	HvFRF22	618	637	+	17.2821	7.96e-07	0.00651	AAAAGCATAAAGAAAAGAGA
MLOC_70754	AP2	HvFRF16	108	127	+	17.0385	9.64e-07	0.00717	AGAGAAAAAAAAACTAGACA
MLOC_70754	AP2	HvFRF6	1103	1122	+	16.7821	1.17e-06	0.00791	GAGAGAAAAGAAAGAAGAAA
MLOC_70754	AP2	HvFRF7	687	706	-	16.6923	1.26e-06	0.00791	AAGAAGAAGAGGAGAAGAGA
MLOC_70754	AP2	HvFRF7	690	709	-	16.5128	1.44e-06	0.00841	AGGAAGAAGAAGAGGAGAAG
MLOC_70754	AP2	HvFRF14	769	788	-	16.1538	1.87e-06	0.00851	GGGGCCAAGAAAAAGAGAGA
MLOC_70754	AP2	HvFRF22	810	829	-	16.1538	1.87e-06	0.00851	GGGGCCAAGAAAAAGAGAGA
MLOC_70754	AP2	HvFRF2	813	832	-	16.1538	1.87e-06	0.00851	GGGGCCAAGAAAAAGAGAGA
MLOC_70754	AP2	HvFRF9	828	847	-	16.1538	1.87e-06	0.00851	GGGGCCAAGAAAAAGAGAGA
MLOC_70754	AP2	HvFRF7	1135	1154	+	15.9872	2.11e-06	0.00909	AAAAAGAAAACAACAAGAGA
MLOC_70754	AP2	HvFRF7	337	356	-	15.8846	2.27e-06	0.00929	GTAAAAAAAGAAACAAAAAA
MLOC_70754	AP2	HvFRF11	674	693	-	15.6282	2.72e-06	0.0106	AGGAAGAAGAAGGGGAGAAG
MLOC_70754	AP2	HvFRF1	517	536	+	15.4359	3.1e-06	0.0114	AAGAGACAGAAAACAAGAAA
MLOC_70754	AP2	HvFRF13	1048	1067	+	15.2436	3.54e-06	0.0114	GAGAAAAAAGGAGGAACAAA
MLOC_70754	AP2	HvFRF11	671	690	-	15.2308	3.57e-06	0.0114	AAGAAGAAGGGGAGAAGAGA
MLOC_70754	AP2	HvFRF8	1272	1291	+	15.1923	3.66e-06	0.0114	TGTAGAAAGGAAAGGAGAAA
MLOC_70754	AP2	HvFRF6	1105	1124	+	15.1795	3.69e-06	0.0114	GAGAAAAGAAAGAAGAAACA
MLOC_70754	AP2	HvFRF20	1826	1845	-	15.1538	3.76e-06	0.0114	GATGCAGAGGGAGAAAGAGA
MLOC_70754	AP2	HvFRF21	1753	1772	+	15.1026	3.89e-06	0.0114	AAAAAAAAAGAAGCAACAAT
MLOC_70754	AP2	HvFRF6	1108	1127	+	14.9615	4.27e-06	0.0119	AAAAGAAAGAAGAAACAAAG
MLOC_70754	AP2	HvFRF13	1049	1068	+	14.8462	4.6e-06	0.0119	AGAAAAAAGGAGGAACAAAA
MLOC_70754	AP2	HvFRF16	604	623	+	14.8077	4.72e-06	0.0119	AAGAAGATGAAGAAGAATGA
MLOC_70754	AP2	HvFRF1	519	538	+	14.7949	4.76e-06	0.0119	GAGACAGAAAACAAGAAAAA
MLOC_70754	AP2	HvFRF21	1751	1770	+	14.7821	4.8e-06	0.0119	GGAAAAAAAAAGAAGCAACA
MLOC_70754	AP2	HvFRF7	356	375	-	14.7179	5e-06	0.012	ACAAAATAAAATAAAAAAAG
MLOC_70754	AP2	HvFRF22	620	639	+	14.6667	5.17e-06	0.012	AAGCATAAAGAAAAGAGACA
MLOC_70754	AP2	HvFRF7	350	369	-	14.6282	5.3e-06	0.012	TAAAATAAAAAAAGTAAAAA
MLOC_70754	AP2	HvFRF4	1945	1964	+	14.5513	5.57e-06	0.0123	CAAAAAAAGGAGAATACAAG
MLOC_70754	AP2	HvFRF1	326	345	+	14.4872	5.8e-06	0.0123	AAAAAAGTGAAAACGAAAAC
MLOC_70754	AP2	HvFRF1	500	519	+	14.4744	5.85e-06	0.0123	ATAACCGTAAAAAAAAGAAG
MLOC_70754	AP2	HvFRF8	545	564	+	14.3205	6.44e-06	0.0132	ATAAAAAAAGGAAGGAAAGG
MLOC_70754	AP2	HvFRF13	1566	1585	+	14.1667	7.09e-06	0.0136	AAAAACATGAAAAAAATAGT
MLOC_70754	AP2	HvFRF1	318	337	+	14.1538	7.15e-06	0.0136	GTAAAAGTAAAAAAGTGAAA
MLOC_70754	AP2	HvFRF22	179	198	+	14.1282	7.26e-06	0.0136	AAGCATAAAAATAAAAGAAG
MLOC_70754	AP2	HvFRF1	543	562	+	14.1154	7.32e-06	0.0136	CAGAAAATGGGTAAAAAAAA
MLOC_70754	AP2	HvFRF20	1889	1908	+	14.0641	7.55e-06	0.0136	AAAAAGTTGGAAAAAAAACA
MLOC_70754	AP2	HvFRF7	351	370	-	14.0385	7.67e-06	0.0136	ATAAAATAAAAAAAGTAAAA
MLOC_70754	AP2	HvFRF13	1291	1310	+	13.9103	8.3e-06	0.0144	ATAACAAAAGGGGAAAGACA
MLOC_70754	AP2	HvFRF11	1117	1136	+	13.8846	8.43e-06	0.0144	AAAAAGAAAACAACAACAGA
MLOC_70754	AP2	HvFRF13	1011	1030	+	13.7692	9.04e-06	0.0151	TGTGAAAAAAAGGAAAATAG
MLOC_70754	AP2	HvFRF21	318	337	-	13.5641	1.02e-05	0.0167	GAGGGAATAGAGGAGAGACA
MLOC_70754	AP2	HvFRF16	101	120	+	13.3462	1.16e-05	0.0183	TAGAATCAGAGAAAAAAAAA
MLOC_70754	AP2	HvFRF6	1100	1119	+	13.3333	1.17e-05	0.0183	GATGAGAGAAAAGAAAGAAG
MLOC_70754	AP2	HvFRF21	1746	1765	+	13.3077	1.19e-05	0.0183	ACACAGGAAAAAAAAAGAAG
MLOC_70754	AP2	HvFRF11	947	966	-	13.2179	1.25e-05	0.019	GGTGCAGAAAGAAAGATAGG
MLOC_70754	AP2	HvFRF3	1267	1286	-	13.1538	1.3e-05	0.0193	GAAAAATTATGAGAGAGAGG
MLOC_70754	AP2	HvFRF1	533	552	+	12.8718	1.52e-05	0.0215	GAAAAAAAAACAGAAAATGG
MLOC_70754	AP2	HvFRF18	1323	1342	+	12.8718	1.52e-05	0.0215	AATAAAAAGAAAGAGAATCC
MLOC_70754	AP2	HvFRF7	964	983	-	12.8718	1.52e-05	0.0215	GGTGCAGAGAGAAAGATAGG
MLOC_70754	AP2	HvFRF4	844	863	-	12.6154	1.76e-05	0.0231	TGAAAAAAATATAATATAAA
MLOC_10221	AP2	HvFRF1	627	647	-	10.6778	1.79e-05	1	CCGCACAGACCCCAACTCGAT
MLOC_70754	AP2	HvFRF14	935	954	+	12.5641	1.81e-05	0.0231	AAAAAAGAAAACAAACAAGG
MLOC_70754	AP2	HvFRF22	976	995	+	12.5641	1.81e-05	0.0231	AAAAAAGAAAACAAACAAGG
MLOC_70754	AP2	HvFRF9	996	1015	+	12.5641	1.81e-05	0.0231	AAAAAAGAAAACAAACAAGG
MLOC_70754	AP2	HvFRF13	1039	1058	+	12.5641	1.81e-05	0.0231	ACAGGAAAGGAGAAAAAAGG
MLOC_70754	AP2	HvFRF1	1962	1981	+	12.5641	1.81e-05	0.0231	AAAAAAGAAAACAAACAAGG
MLOC_70754	AP2	HvFRF1	310	329	+	12.5385	1.83e-05	0.0231	AAGGAATAGTAAAAGTAAAA
MLOC_70754	AP2	HvFRF3	281	300	-	12.3077	2.08e-05	0.0258	TATAATAAGGGAGCAAAAGA
MLOC_70754	AP2	HvFRF9	278	297	-	12.2564	2.14e-05	0.0261	CATAAATAAAGAAATATAAG
MLOC_70754	AP2	HvFRF12	1162	1181	+	12.0385	2.4e-05	0.0289	GATGATAAGAGAAAATAAAA
MLOC_70754	AP2	HvFRF14	1847	1866	+	11.9359	2.53e-05	0.0301	TAAAAAAAATGTAAATAAAA
MLOC_43575	AP2	HvFRF5	81	90	-	12.5545	2.61e-05	1	ACCTCGTAGC
MLOC_70754	AP2	HvFRF1	324	343	+	11.8718	2.62e-05	0.0304	GTAAAAAAGTGAAAACGAAA
MLOC_70754	AP2	HvFRF1	524	543	+	11.8462	2.66e-05	0.0304	AGAAAACAAGAAAAAAAAAC
MLOC_70754	AP2	HvFRF5	1299	1318	+	11.8205	2.69e-05	0.0304	AAAACTGAAAAAACTATAGA
MLOC_70754	AP2	HvFRF18	1412	1431	-	11.8077	2.71e-05	0.0304	CTAACAAAAAAGGCAAAAAA
MLOC_70754	AP2	HvFRF18	662	681	+	11.6923	2.88e-05	0.0318	GATAAATTAAATACGAAAGG
MLOC_70754	AP2	HvFRF2	979	998	+	11.5897	3.03e-05	0.0327	AAAGAAGAAAACAAACAAGG
MLOC_70754	AP2	HvFRF21	121	140	-	11.5897	3.03e-05	0.0327	TAGAGATAAGGAGATAGAGA
MLOC_70754	AP2	HvFRF1	539	558	+	11.4103	3.32e-05	0.0343	AAAACAGAAAATGGGTAAAA
MLOC_70754	AP2	HvFRF16	590	609	+	11.3974	3.35e-05	0.0343	AAAACGAGAAAAGGAAGAAG
MLOC_70754	AP2	HvFRF14	803	822	-	11.3462	3.43e-05	0.0343	GATCCAGAGGGAGAAAGAGA
MLOC_70754	AP2	HvFRF22	844	863	-	11.3462	3.43e-05	0.0343	GATCCAGAGGGAGAAAGAGA
MLOC_70754	AP2	HvFRF9	862	881	-	11.3462	3.43e-05	0.0343	GATCCAGAGGGAGAAAGAGA
MLOC_70754	AP2	HvFRF1	1832	1851	-	11.3462	3.43e-05	0.0343	GATCCAGAGGGAGAAAGAGA
MLOC_43575	AP2	HvFRF6	261	270	-	11.9727	3.45e-05	1	ACCTCGTAGG
MLOC_70754	AP2	HvFRF6	1969	1988	-	11.1795	3.73e-05	0.0368	ATTGCCAAAAATAAAACAGA
MLOC_70754	AP2	HvFRF20	1228	1247	+	11.1538	3.78e-05	0.0368	GAAGGAGAGAAGACACGAGA
MLOC_70754	AP2	HvFRF13	1036	1055	+	11.0128	4.05e-05	0.039	ATTACAGGAAAGGAGAAAAA
MLOC_70754	AP2	HvFRF13	1667	1686	+	10.9231	4.23e-05	0.0399	GGACAGATGAAAAAAATAAA
MLOC_70754	AP2	HvFRF7	334	353	-	10.9103	4.26e-05	0.0399	AAAAAAGAAACAAAAAATCT
MLOC_70754	AP2	HvFRF13	1012	1031	+	10.8974	4.29e-05	0.0399	GTGAAAAAAAGGAAAATAGT
MLOC_70754	AP2	HvFRF10	1206	1225	-	10.8718	4.34e-05	0.0399	TATGGATTAAATGAAAAAAA
MLOC_70754	AP2	HvFRF18	706	725	-	10.8205	4.45e-05	0.0405	TGTAAAAAGGGAACAAATCA
MLOC_70754	AP2	HvFRF8	1274	1293	+	10.7051	4.71e-05	0.0423	TAGAAAGGAAAGGAGAAAGT
MLOC_70754	AP2	HvFRF3	1354	1373	-	10.6667	4.79e-05	0.0426	TATGATATAAATGAGATACA
MLOC_70754	AP2	HvFRF14	1851	1870	+	10.6026	4.94e-05	0.0435	AAAAATGTAAATAAAATTGG
MLOC_70754	AP2	HvFRF19	1077	1096	+	10.5641	5.04e-05	0.0438	ACAAAAAAGTCAAAAACACA
MLOC_70754	AP2	HvFRF1	302	321	+	10.4231	5.38e-05	0.0464	TCAAACAAAAGGAATAGTAA
MLOC_70754	AP2	HvFRF6	1622	1641	-	10.359	5.55e-05	0.0473	TGGGAAGAGGAGGCGTGAAA
MLOC_70754	AP2	HvFRF14	564	583	+	10.1538	6.11e-05	0.0492	AAGCATCAAGAAAAGAGACA
MLOC_70754	AP2	HvFRF9	623	642	+	10.1538	6.11e-05	0.0492	AAGCATCAAGAAAAGAGACA
MLOC_70754	AP2	HvFRF2	627	646	+	10.1538	6.11e-05	0.0492	AAGCATCAAGAAAAGAGACA
MLOC_70754	AP2	HvFRF13	1051	1070	+	10.141	6.14e-05	0.0492	AAAAAAGGAGGAACAAAAAT
MLOC_70754	AP2	HvFRF4	1807	1826	-	10.1154	6.21e-05	0.0492	TAGGAGAAGGAAGGTAAAAG
MLOC_70754	AP2	HvFRF7	338	357	-	10.0897	6.29e-05	0.0492	AGTAAAAAAAGAAACAAAAA
MLOC_70754	AP2	HvFRF13	118	137	+	10.0769	6.33e-05	0.0492	TAAACTGAAAAAAGGCAAAA
MLOC_70754	AP2	HvFRF1	314	333	+	10.0641	6.36e-05	0.0492	AATAGTAAAAGTAAAAAAGT
MLOC_70754	AP2	HvFRF1	545	564	+	10.0641	6.36e-05	0.0492	GAAAATGGGTAAAAAAAAAG
MLOC_70754	AP2	HvFRF9	422	441	-	10.0513	6.4e-05	0.0492	CAGAAAAAAGAGGGAAATGG
MLOC_70754	AP2	HvFRF20	1409	1428	-	10.0385	6.44e-05	0.0492	CAGAAAAAAAAAAGGAATCT
MLOC_70754	AP2	HvFRF7	340	359	-	9.88462	6.91e-05	0.0522	AAAGTAAAAAAAGAAACAAA
MLOC_70754	AP2	HvFRF13	1745	1764	+	9.87179	6.95e-05	0.0522	AGGGCCTAAAGTAAAAAAAG
MLOC_70754	AP2	HvFRF20	1568	1587	+	9.79487	7.19e-05	0.053	AGGGGAAAAACAACAACACA
MLOC_70754	AP2	HvFRF17	1658	1677	-	9.79487	7.19e-05	0.053	CAAAAGGAAAAAACGATTCG
MLOC_70754	AP2	HvFRF21	1508	1527	-	9.76923	7.28e-05	0.0532	GGGACAGAATAGAGGACAAG
MLOC_70754	AP2	HvFRF20	1819	1838	-	9.74359	7.36e-05	0.0533	AGGGAGAAAGAGAGGTGAAG
MLOC_70754	AP2	HvFRF5	1393	1412	-	9.66667	7.62e-05	0.0547	AAAACAATAGATAGGCAAAA
MLOC_70754	AP2	HvFRF19	768	787	+	9.58974	7.89e-05	0.0559	AAAAATCTGAAGGAAAATAA
MLOC_70754	AP2	HvFRF13	412	431	+	9.57692	7.93e-05	0.0559	TAAAGACTAAAGACGAGACG
MLOC_43575	AP2	HvFRF6	1435	1444	-	10.6364	7.96e-05	1	ACGTCGTACG
MLOC_70754	AP2	HvFRF21	304	323	-	9.47436	8.3e-05	0.0576	GAGACAAAGAAGGCACCAGA
MLOC_70754	AP2	HvFRF21	320	339	-	9.47436	8.3e-05	0.0576	GGGAGGGAATAGAGGAGAGA
MLOC_70754	AP2	HvFRF19	1153	1172	+	9.4359	8.44e-05	0.0576	CCAAAGAAAACAACAAGAGA
MLOC_70754	AP2	HvFRF15	1546	1565	+	9.4359	8.44e-05	0.0576	CAAAAGGGAGGGAAAAAAGA
MLOC_70754	AP2	HvFRF15	1028	1047	+	9.41026	8.54e-05	0.0576	TAGGAGATAGAAAATAAAAT
MLOC_70754	AP2	HvFRF3	638	657	+	9.39744	8.59e-05	0.0576	AAAAGGATGGACAGGAGAAA
MLOC_70754	AP2	HvFRF16	106	125	+	9.37179	8.68e-05	0.0578	TCAGAGAAAAAAAAACTAGA
MLOC_70754	AP2	HvFRF7	408	427	-	9.26923	9.08e-05	0.0599	AATAGCAGGAAAAAGAATCA
MLOC_70754	AP2	HvFRF7	344	363	-	9.23077	9.23e-05	0.0603	AAAAAAAGTAAAAAAAGAAA
MLOC_70754	AP2	HvFRF15	1545	1564	+	9.21795	9.28e-05	0.0603	TCAAAAGGGAGGGAAAAAAG
MLOC_70754	AP2	HvFRF13	420	439	+	9.12821	9.65e-05	0.0616	AAAGACGAGACGGAGAAAAC
MLOC_70754	AP2	HvFRF16	596	615	+	9.12821	9.65e-05	0.0616	AGAAAAGGAAGAAGATGAAG
MLOC_70754	AP2	HvFRF13	1872	1891	+	9.11538	9.7e-05	0.0616	AGAAAACAATGAGAATGAAG
MLOC_70754	AP2	HvFRF15	1550	1569	+	9.05128	9.98e-05	0.0628	AGGGAGGGAAAAAAGACTAG
MLOC_64795	ARF	HvFRF14	1841	1861	-	6.51807	3.18e-06	0.143	TTTACATTTTTTTTAGGAAAT
MLOC_64795	ARF	HvFRF19	1298	1318	-	6.18072	3.54e-06	0.143	GTGGTGGTTTAGGTGGAAAAT
MLOC_64795	ARF	HvFRF3	1222	1242	+	1.95181	1.26e-05	0.209	GTTATTCTTTTGATGAGAATA
MLOC_64795	ARF	HvFRF11	1263	1283	-	1.86747	1.29e-05	0.209	GTGGTGCTTTAGGTGGAAAAT
MLOC_64795	ARF	HvFRF7	1281	1301	-	1.86747	1.29e-05	0.209	GTGGTGCTTTAGGTGGAAAAT
MLOC_58330	ARF	HvFRF7	14	22	-	11.64	1.33e-05	0.736	GTTGTCGGC
MLOC_38232	ARF	HvFRF7	12	21	-	13.5	1.58e-05	1	TTGTCGGCAC
MLOC_64795	ARF	HvFRF1	349	369	-	0.289157	2.02e-05	0.218	TTGGTACTTTTGATAAGAAAT
MLOC_64795	ARF	HvFRF2	1841	1861	-	0.168675	2.08e-05	0.218	GTTACATTTTTTTTAGGAAAT
MLOC_55345	ARF	HvFRF21	1631	1640	+	12.6364	2.45e-05	0.946	ACAGACAAAA
MLOC_64795	ARF	HvFRF8	698	718	-	-0.53012	2.52e-05	0.218	GATGTGCTTTTGGGAGAAAAG
MLOC_58330	ARF	HvFRF17	115	123	-	11.35	2.58e-05	0.736	CCTGTCGGC
MLOC_58330	ARF	HvFRF10	1035	1043	-	11.35	2.58e-05	0.736	CCTGTCGGC
MLOC_64795	ARF	HvFRF11	924	944	-	-0.831325	2.74e-05	0.218	TTGTCTTTTGAGGGGGAGAAA
MLOC_64795	ARF	HvFRF7	941	961	-	-0.831325	2.74e-05	0.218	TTGTCTTTTGAGGGGGAGAAA
MLOC_64795	ARF	HvFRF4	1625	1645	+	-1.43373	3.22e-05	0.218	TAGATGATGTTAGTGGAAAAA
MLOC_64795	ARF	HvFRF14	745	765	-	-1.77108	3.52e-05	0.218	TTTGCCTTTTTGAGTTGGAGA
MLOC_64795	ARF	HvFRF9	804	824	-	-1.77108	3.52e-05	0.218	TTTGCCTTTTTGAGTTGGAGA
MLOC_55345	ARF	HvFRF3	182	191	-	12.3636	3.58e-05	0.946	TCAGACAAAA
MLOC_55345	ARF	HvFRF18	1547	1556	+	12.3636	3.58e-05	0.946	TCAGACAAAA
MLOC_64795	ARF	HvFRF12	584	604	+	-2.09639	3.84e-05	0.218	TAATCTTTTTTGACTCAGAAA
MLOC_64795	ARF	HvFRF19	962	982	-	-2.31325	4.06e-05	0.218	GTTGTCTTTGAGGGGGAGAAA
MLOC_64596	ARF	HvFRF21	896	903	-	13.3444	4.33e-05	0.551	ACCGACAC
MLOC_64596	ARF	HvFRF21	943	950	-	13.3444	4.33e-05	0.551	ACCGACAC
MLOC_64596	ARF	HvFRF7	21	28	+	13.3444	4.33e-05	0.551	ACCGACAC
MLOC_64795	ARF	HvFRF20	1541	1561	-	-2.91566	4.75e-05	0.218	CTTGTGTTTTATGCGAGTGAA
MLOC_64795	ARF	HvFRF5	1522	1542	-	-2.95181	4.8e-05	0.218	TGTGTGATTTTTGTAAGAAAC
MLOC_64795	ARF	HvFRF21	1471	1491	-	-3	4.86e-05	0.218	GATACATTTTTTGGATGAAAG
MLOC_38232	ARF	HvFRF18	75	84	-	12.1091	4.87e-05	1	GTGTCGGCAT
MLOC_68907	ARF	HvFRF7	13	22	+	11.2273	5.48e-05	1	TGCCGACAAC
MLOC_18401	ARF	HvFRF7	13	22	+	11.2273	5.48e-05	1	TGCCGACAAC
MLOC_64596	ARF	HvFRF19	1879	1886	-	13.2556	5.66e-05	0.551	ACCGACAG
MLOC_64596	ARF	HvFRF11	1891	1898	-	13.2556	5.66e-05	0.551	ACCGACAG
MLOC_64596	ARF	HvFRF7	1891	1898	-	13.2556	5.66e-05	0.551	ACCGACAG
MLOC_64596	ARF	HvFRF14	1897	1904	-	13.2556	5.66e-05	0.551	ACCGACAG
MLOC_64596	ARF	HvFRF22	1897	1904	-	13.2556	5.66e-05	0.551	ACCGACAG
MLOC_64596	ARF	HvFRF2	1897	1904	-	13.2556	5.66e-05	0.551	ACCGACAG
MLOC_64795	ARF	HvFRF20	1775	1795	-	-3.86747	6.06e-05	0.244	GTGATGTTTTGGGGGAGAAAC
MLOC_68907	ARF	HvFRF17	114	123	+	11.0909	6.17e-05	1	CGCCGACAGG
MLOC_68907	ARF	HvFRF10	1034	1043	+	11.0909	6.17e-05	1	CGCCGACAGG
MLOC_68907	ARF	HvFRF18	1546	1555	+	11.0909	6.17e-05	1	TTCAGACAAA
MLOC_18401	ARF	HvFRF17	114	123	+	11.0909	6.17e-05	1	CGCCGACAGG
MLOC_18401	ARF	HvFRF10	1034	1043	+	11.0909	6.17e-05	1	CGCCGACAGG
MLOC_18401	ARF	HvFRF18	1546	1555	+	11.0909	6.17e-05	1	TTCAGACAAA
MLOC_64795	ARF	HvFRF6	1143	1163	-	-3.95181	6.19e-05	0.244	TATATTCTTTCGACAAAGAAT
MLOC_64795	ARF	HvFRF15	238	258	+	-4.16867	6.54e-05	0.244	ATCACGTTATTTGTGTATAAA
MLOC_64795	ARF	HvFRF8	1546	1566	+	-4.22892	6.64e-05	0.244	ATCTTTTTTTATGTTGAAAAA
MLOC_55345	ARF	HvFRF17	115	124	+	11.4394	6.89e-05	0.946	GCCGACAGGA
MLOC_55345	ARF	HvFRF10	1035	1044	+	11.4394	6.89e-05	0.946	GCCGACAGGA
MLOC_64795	ARF	HvFRF18	1539	1559	+	-4.40964	6.95e-05	0.245	TTTGCTATTCAGACAAAAAAT
MLOC_68907	ARF	HvFRF13	256	265	+	10.9091	7.62e-05	1	TAGCGACAAA
MLOC_68907	ARF	HvFRF13	449	458	+	10.9091	7.62e-05	1	TAGCGACAAA
MLOC_18401	ARF	HvFRF13	256	265	+	10.9091	7.62e-05	1	TAGCGACAAA
MLOC_18401	ARF	HvFRF13	449	458	+	10.9091	7.62e-05	1	TAGCGACAAA
MLOC_64596	ARF	HvFRF7	14	21	+	12.2	8.31e-05	0.729	GCCGACAA
MLOC_55345	ARF	HvFRF2	1932	1941	+	11.1061	8.43e-05	0.946	ACCGACCAAA
MLOC_55345	ARF	HvFRF22	1932	1941	+	11.1061	8.43e-05	0.946	ACCGACCAAA
MLOC_64795	ARF	HvFRF4	451	471	-	-5.25301	8.57e-05	0.289	CTTGCTATATTTACGCGAAAC
MLOC_55345	ARF	HvFRF10	350	359	+	10.9545	9.11e-05	0.946	GCAGACAACA
MLOC_64795	ARF	HvFRF4	652	672	+	-5.56627	9.26e-05	0.293	ATAACTATTTTAGGTTGAAAT
MLOC_64795	ARF	HvFRF20	789	809	+	-5.63855	9.42e-05	0.293	AATTTCTTTTTTGCTTAAAAT
MLOC_64596	ARF	HvFRF18	77	84	+	12.1333	9.49e-05	0.756	GCCGACAC
MLOC_55345	ARF	HvFRF15	1887	1896	-	10.8485	9.88e-05	0.946	GCAGACAATA
MLOC_23250	ARR-B	HvFRF21	1040	1049	+	12.3909	3.68e-05	1	AAAGATATGC
MLOC_23250	ARR-B	HvFRF13	1346	1355	+	11.9182	5.25e-05	1	AAAGATTCGT
MLOC_23250	ARR-B	HvFRF3	591	600	+	11.1364	7.86e-05	1	ACAGATACGA
MLOC_23250	ARR-B	HvFRF16	1826	1835	-	11.0545	8.31e-05	1	GAAGATTTGG
MLOC_76165	ARR-B	HvFRF11	1463	1470	-	10.9091	8.66e-05	1	AGATCCTC
MLOC_15725	B3	HvFRF3	1346	1360	-	16.6212	1.12e-06	0.0939	AGATACATGCAAAAA
MLOC_15725	B3	HvFRF19	1769	1783	-	15.5606	3.36e-06	0.0939	ATGCACATGCATTCA
MLOC_23884	B3	HvFRF14	1841	1861	-	5.74648	3.48e-06	0.223	TTTACATTTTTTTTAGGAAAT
MLOC_15725	B3	HvFRF20	1942	1956	+	15.5303	3.48e-06	0.0939	AAAAACATGCAAGGA
MLOC_69727	B3	HvFRF16	506	514	+	14.7943	3.52e-06	0.154	CTGCATGCA
MLOC_69727	B3	HvFRF15	612	620	+	14.7943	3.52e-06	0.154	CTGCATGCA
MLOC_15725	B3	HvFRF15	1393	1407	-	14.7121	7.16e-06	0.0939	TTTTGCATGCATGAT
MLOC_15725	B3	HvFRF21	1641	1655	+	14.6364	7.59e-06	0.0939	AAAAACATGCATGAC
MLOC_15725	B3	HvFRF21	1389	1403	-	14.5909	7.89e-06	0.0939	TAGTACATGCAAGCT
MLOC_15725	B3	HvFRF18	542	556	-	14.4848	8.56e-06	0.0939	ACGTGCATGCACACA
MLOC_15725	B3	HvFRF15	1394	1408	+	14.3939	9.18e-06	0.0939	TCATGCATGCAAAAC
MLOC_23884	B3	HvFRF17	779	799	+	2	9.87e-06	0.223	TATCCTATTTTGTTGAGAAAT
MLOC_15725	B3	HvFRF7	1366	1380	-	14.1818	1.07e-05	0.0939	ATGCACATGCATGAG
MLOC_15725	B3	HvFRF15	856	870	-	14.1667	1.09e-05	0.0939	GAATACATGCAAAAT
MLOC_69727	B3	HvFRF16	507	515	-	13.3546	1.1e-05	0.193	TTGCATGCA
MLOC_69727	B3	HvFRF15	613	621	-	13.3546	1.1e-05	0.193	TTGCATGCA
MLOC_69727	B3	HvFRF15	1397	1405	-	13.3546	1.1e-05	0.193	TTGCATGCA
MLOC_15725	B3	HvFRF20	514	528	+	13.9394	1.28e-05	0.1	GAATACATGCAATCT
MLOC_23884	B3	HvFRF2	1841	1861	-	0.887324	1.32e-05	0.223	GTTACATTTTTTTTAGGAAAT
MLOC_15725	B3	HvFRF15	1390	1404	+	13.7576	1.46e-05	0.104	TCAATCATGCATGCA
MLOC_23884	B3	HvFRF5	521	541	-	0.295775	1.55e-05	0.223	CCTTTTGTTTTGCTGGGAAAC
MLOC_69727	B3	HvFRF15	1055	1063	-	13.234	1.73e-05	0.194	CTGCATGCC
MLOC_69727	B3	HvFRF21	1595	1603	+	13.234	1.73e-05	0.194	CTGCATGCC
MLOC_15725	B3	HvFRF15	610	624	+	13.4545	1.78e-05	0.118	ACCTGCATGCAAATG
MLOC_23884	B3	HvFRF4	1625	1645	+	-0.28169	1.79e-05	0.223	TAGATGATGTTAGTGGAAAAA
MLOC_15725	B3	HvFRF9	966	980	+	13.1818	2.12e-05	0.123	AAAAACATGCAGGAA
MLOC_15725	B3	HvFRF12	268	282	-	13.1667	2.14e-05	0.123	TAAAACATGCAAGTG
MLOC_23884	B3	HvFRF17	1753	1773	-	-0.985915	2.14e-05	0.223	CTATTGCTTTCGTCGGAAAAC
MLOC_23884	B3	HvFRF5	1522	1542	-	-1.16901	2.24e-05	0.223	TGTGTGATTTTTGTAAGAAAC
MLOC_23884	B3	HvFRF8	369	389	+	-1.28169	2.31e-05	0.223	GAATAAGTTTTAGCAAAAAAA
MLOC_23884	B3	HvFRF19	1298	1318	-	-1.4507	2.41e-05	0.223	GTGGTGGTTTAGGTGGAAAAT
MLOC_69727	B3	HvFRF14	1187	1195	-	12.9716	2.7e-05	0.194	CAGCATGCA
MLOC_69727	B3	HvFRF22	1248	1256	-	12.9716	2.7e-05	0.194	CAGCATGCA
MLOC_69727	B3	HvFRF9	1249	1257	-	12.9716	2.7e-05	0.194	CAGCATGCA
MLOC_69727	B3	HvFRF2	1250	1258	-	12.9716	2.7e-05	0.194	CAGCATGCA
MLOC_15725	B3	HvFRF11	1348	1362	-	12.7424	2.74e-05	0.14	ATGCACATGCATTAG
MLOC_23884	B3	HvFRF18	799	819	-	-2.35211	3.01e-05	0.226	TTATAATGTCAGGCGGGAAAC
MLOC_15725	B3	HvFRF12	304	318	-	12.4545	3.21e-05	0.14	CTACACATGCATTTC
MLOC_23884	B3	HvFRF20	1878	1898	-	-2.66197	3.24e-05	0.226	CCAACTTTTTTGTTGTGAAAA
MLOC_23884	B3	HvFRF21	1797	1817	-	-2.67606	3.25e-05	0.226	CTGCTTTTGTTGACTGGAAAA
MLOC_69727	B3	HvFRF18	545	553	+	12.0638	3.45e-05	0.194	GTGCATGCA
MLOC_69727	B3	HvFRF18	546	554	-	12.0638	3.45e-05	0.194	GTGCATGCA
MLOC_69727	B3	HvFRF15	1362	1370	+	12.0638	3.45e-05	0.194	GTGCATGCA
MLOC_69727	B3	HvFRF15	1363	1371	-	12.0638	3.45e-05	0.194	GTGCATGCA
MLOC_15725	B3	HvFRF18	543	557	+	12.1818	3.71e-05	0.14	GTGTGCATGCACGTA
MLOC_69727	B3	HvFRF12	1062	1070	+	12.0567	3.76e-05	0.194	CCGCATGCT
MLOC_69727	B3	HvFRF21	1217	1225	-	12.0567	3.76e-05	0.194	CCGCATGCT
MLOC_15725	B3	HvFRF4	412	426	+	12.1364	3.79e-05	0.14	TCGTCCATGCAAACT
MLOC_23884	B3	HvFRF5	1289	1309	-	-3.56338	4.03e-05	0.226	TTTTCAGTTTTTGTAGGCAGC
MLOC_15725	B3	HvFRF19	1382	1396	-	11.9394	4.18e-05	0.14	ACGCACATGCATCAG
MLOC_23884	B3	HvFRF2	1802	1822	+	-3.87324	4.34e-05	0.226	TTACCAGTTTTCGAGAAAAAA
MLOC_23884	B3	HvFRF14	1802	1822	+	-3.87324	4.34e-05	0.226	TTACCAGTTTTCGAGAAAAAA
MLOC_23884	B3	HvFRF22	1803	1823	+	-3.87324	4.34e-05	0.226	TTACCAGTTTTCGAGAAAAAA
MLOC_15725	B3	HvFRF15	609	623	-	11.7576	4.56e-05	0.14	ATTTGCATGCAGGTC
MLOC_15725	B3	HvFRF5	578	592	-	11.7424	4.59e-05	0.14	ACTAACATGCATTGT
MLOC_15725	B3	HvFRF21	1644	1658	-	11.6212	4.86e-05	0.14	ACAGTCATGCATGTT
MLOC_15725	B3	HvFRF13	820	834	+	11.6061	4.89e-05	0.14	TTATTCATGCAGGTA
MLOC_15725	B3	HvFRF11	1087	1101	+	11.4545	5.23e-05	0.14	AAAAACATGCAGGTG
MLOC_15725	B3	HvFRF7	1105	1119	+	11.4545	5.23e-05	0.14	AAAAACATGCAGGTG
MLOC_15725	B3	HvFRF14	1183	1197	-	11.4091	5.33e-05	0.14	AACAGCATGCATTTT
MLOC_15725	B3	HvFRF22	1244	1258	-	11.4091	5.33e-05	0.14	AACAGCATGCATTTT
MLOC_15725	B3	HvFRF9	1245	1259	-	11.4091	5.33e-05	0.14	AACAGCATGCATTTT
MLOC_69727	B3	HvFRF20	404	412	-	11.7092	5.48e-05	0.265	TGGCATGCA
MLOC_15725	B3	HvFRF16	503	517	-	11.3333	5.51e-05	0.14	AGTTGCATGCAGACT
MLOC_15725	B3	HvFRF14	905	919	+	11.2879	5.62e-05	0.14	CAAAACATGCAGGAA
MLOC_15725	B3	HvFRF22	946	960	+	11.2879	5.62e-05	0.14	CAAAACATGCAGGAA
MLOC_69727	B3	HvFRF19	66	74	-	11.6809	5.76e-05	0.265	CCGCATGCC
MLOC_23884	B3	HvFRF20	1871	1891	+	-5.11268	5.81e-05	0.266	TTCCCTGTTTTCACAACAAAA
MLOC_15725	B3	HvFRF4	1193	1207	+	11.1818	5.88e-05	0.14	ATCTTCATGCATTCG
MLOC_15725	B3	HvFRF15	1052	1066	+	11.1667	5.91e-05	0.14	ATAGGCATGCAGCCA
MLOC_15725	B3	HvFRF9	37	51	+	11.1515	5.95e-05	0.14	ATTCTCATGCAATAA
MLOC_15725	B3	HvFRF5	1714	1728	+	11.1364	5.99e-05	0.14	ATGGCCATGCATACT
MLOC_15725	B3	HvFRF21	1015	1029	-	11.0909	6.1e-05	0.14	ATCAACATGCATCAT
MLOC_23884	B3	HvFRF10	872	892	+	-5.52113	6.38e-05	0.266	GTCGGCGGTTTGGTTGAAAAA
MLOC_69727	B3	HvFRF19	1986	1994	-	11.5887	6.39e-05	0.27	CGGCATGCC
MLOC_15725	B3	HvFRF20	400	414	-	10.9545	6.45e-05	0.14	TTTGGCATGCATTCT
MLOC_15725	B3	HvFRF3	758	772	-	10.9545	6.45e-05	0.14	ATCCACATGCACACT
MLOC_15725	B3	HvFRF2	1246	1260	-	10.9394	6.49e-05	0.14	AACAGCATGCATTTG
MLOC_15725	B3	HvFRF16	1064	1078	-	10.8788	6.64e-05	0.14	TTCAACATGCACGCA
MLOC_69727	B3	HvFRF17	569	577	-	11.5319	6.78e-05	0.27	TAGCATGCA
MLOC_69727	B3	HvFRF10	1490	1498	-	11.5319	6.78e-05	0.27	TAGCATGCA
MLOC_23884	B3	HvFRF18	1864	1884	+	-5.91549	6.99e-05	0.266	GTTTAGTTTTTGGTGACAACA
MLOC_23884	B3	HvFRF9	1802	1822	+	-6.04225	7.19e-05	0.266	TTACCAATTTTCGAGAAAAAA
MLOC_15725	B3	HvFRF19	412	426	-	10.6515	7.25e-05	0.141	ATGATCATGCATATG
MLOC_15725	B3	HvFRF1	1932	1946	+	10.6515	7.25e-05	0.141	CAAAACATGCAGGGA
MLOC_15725	B3	HvFRF19	1124	1138	+	10.6212	7.33e-05	0.141	AAAAACATGCAGGGG
MLOC_15725	B3	HvFRF12	1777	1791	+	10.6061	7.38e-05	0.141	TGATACATGCAGTGA
MLOC_23884	B3	HvFRF14	1918	1938	-	-6.19718	7.45e-05	0.266	GGTTTGTGTTTGCCGGGAACA
MLOC_23884	B3	HvFRF1	349	369	-	-6.26761	7.57e-05	0.266	TTGGTACTTTTGATAAGAAAT
MLOC_15725	B3	HvFRF17	565	579	-	10.4242	7.88e-05	0.144	ATTAGCATGCACCTA
MLOC_15725	B3	HvFRF10	1486	1500	-	10.4242	7.88e-05	0.144	ATTAGCATGCACCTA
MLOC_23884	B3	HvFRF3	85	105	-	-6.56338	8.09e-05	0.266	TATTCGACTCTGGTGGGATAT
MLOC_23884	B3	HvFRF14	1809	1829	-	-6.70423	8.36e-05	0.266	CATATATTTTTTTCTCGAAAA
MLOC_23884	B3	HvFRF2	1809	1829	-	-6.70423	8.36e-05	0.266	CATATATTTTTTTCTCGAAAA
MLOC_23884	B3	HvFRF22	1810	1830	-	-6.70423	8.36e-05	0.266	CATATATTTTTTTCTCGAAAA
MLOC_69727	B3	HvFRF15	1396	1404	+	11.2979	8.4e-05	0.32	ATGCATGCA
MLOC_23884	B3	HvFRF13	1557	1577	-	-6.83099	8.6e-05	0.266	TTTCATGTTTTTGTGGAACTA
MLOC_15725	B3	HvFRF4	206	220	+	10.1364	8.7e-05	0.156	TGTTACATGCACTTA
MLOC_23884	B3	HvFRF8	1546	1566	+	-7.1831	9.3e-05	0.274	ATCTTTTTTTATGTTGAAAAA
MLOC_69727	B3	HvFRF17	568	576	+	10.8794	9.41e-05	0.33	GTGCATGCT
MLOC_69727	B3	HvFRF10	1489	1497	+	10.8794	9.41e-05	0.33	GTGCATGCT
MLOC_15725	B3	HvFRF18	1261	1275	-	9.89394	9.42e-05	0.164	AACACCATGCAAGCC
MLOC_15725	B3	HvFRF16	504	518	+	9.86364	9.52e-05	0.164	GTCTGCATGCAACTG
MLOC_23884	B3	HvFRF9	1809	1829	-	-7.35211	9.66e-05	0.274	ATATATTTTTTTTCTCGAAAA
MLOC_69727	B3	HvFRF13	823	831	-	10.8156	9.81e-05	0.33	CTGCATGAA
MLOC_15725	B3	HvFRF19	362	376	+	9.75758	9.83e-05	0.166	ATTGCCATGCAAATT
MLOC_23884	B3	HvFRF8	1547	1567	+	-7.43662	9.84e-05	0.274	TCTTTTTTTATGTTGAAAAAT
MLOC_15776	BBR-BPC	HvFRF14	798	818	+	11.5789	8.38e-07	0.0167	CCACCTCTCTTTCTCCCTCTG
MLOC_15776	BBR-BPC	HvFRF22	839	859	+	11.5789	8.38e-07	0.0167	CCACCTCTCTTTCTCCCTCTG
MLOC_15776	BBR-BPC	HvFRF9	857	877	+	11.5789	8.38e-07	0.0167	CCACCTCTCTTTCTCCCTCTG
MLOC_15776	BBR-BPC	HvFRF1	1827	1847	+	11.5789	8.38e-07	0.0167	CCACCTCTCTTTCTCCCTCTG
MLOC_15776	BBR-BPC	HvFRF21	118	138	+	10.9737	1.05e-06	0.0167	CTATCTCTATCTCCTTATCTC
MLOC_15776	BBR-BPC	HvFRF21	110	130	+	10.0263	1.47e-06	0.0197	ACCTAATTCTATCTCTATCTC
MLOC_15776	BBR-BPC	HvFRF20	1821	1841	+	9.14474	2.01e-06	0.0226	TCACCTCTCTTTCTCCCTCTG
MLOC_15776	BBR-BPC	HvFRF20	1825	1845	+	8.10526	2.88e-06	0.0226	CTCTCTTTCTCCCTCTGCATC
MLOC_15776	BBR-BPC	HvFRF21	116	136	+	8.06579	2.92e-06	0.0226	TTCTATCTCTATCTCCTTATC
MLOC_15776	BBR-BPC	HvFRF14	762	782	+	7.88158	3.11e-06	0.0226	CAAACCCTCTCTCTTTTTCTT
MLOC_15776	BBR-BPC	HvFRF9	821	841	+	7.88158	3.11e-06	0.0226	CAAACCCTCTCTCTTTTTCTT
MLOC_15776	BBR-BPC	HvFRF21	112	132	+	7.48684	3.55e-06	0.0237	CTAATTCTATCTCTATCTCCT
MLOC_15776	BBR-BPC	HvFRF22	803	823	+	6.97368	4.22e-06	0.0241	CAACCCCTCTCTCTTTTTCTT
MLOC_15776	BBR-BPC	HvFRF1	1791	1811	+	6.97368	4.22e-06	0.0241	CAACCCCTCTCTCTTTTTCTT
MLOC_15776	BBR-BPC	HvFRF2	806	826	+	6.48684	4.95e-06	0.0248	CAAGCCCTCTCTCTTTTTCTT
MLOC_15776	BBR-BPC	HvFRF21	122	142	+	6.47368	4.97e-06	0.0248	CTCTATCTCCTTATCTCTAAC
MLOC_15776	BBR-BPC	HvFRF21	124	144	+	6.06579	5.68e-06	0.0267	CTATCTCCTTATCTCTAACTT
MLOC_15776	BBR-BPC	HvFRF5	784	804	+	5.23684	7.41e-06	0.0329	TAGGTTTTATCTCTCTCTCAC
MLOC_15776	BBR-BPC	HvFRF2	842	862	+	4.88158	8.29e-06	0.0331	CCACCTCTCTTTATCCCTCTG
MLOC_15776	BBR-BPC	HvFRF1	1797	1817	+	4.71053	8.75e-06	0.0331	CTCTCTCTTTTTCTTTGCACC
MLOC_15776	BBR-BPC	HvFRF14	734	754	+	4.39474	9.66e-06	0.0331	ATCTCTTATTTTCTCCAACTC
MLOC_15776	BBR-BPC	HvFRF14	796	816	+	3.85526	1.14e-05	0.0331	ATCCACCTCTCTTTCTCCCTC
MLOC_15776	BBR-BPC	HvFRF22	837	857	+	3.85526	1.14e-05	0.0331	ATCCACCTCTCTTTCTCCCTC
MLOC_15776	BBR-BPC	HvFRF9	855	875	+	3.85526	1.14e-05	0.0331	ATCCACCTCTCTTTCTCCCTC
MLOC_15776	BBR-BPC	HvFRF1	1825	1845	+	3.85526	1.14e-05	0.0331	ATCCACCTCTCTTTCTCCCTC
MLOC_15776	BBR-BPC	HvFRF7	963	983	+	3.60526	1.23e-05	0.0331	ACCTATCTTTCTCTCTGCACC
MLOC_15776	BBR-BPC	HvFRF22	775	795	+	3.57895	1.24e-05	0.0331	ATCTCTTGTTTTCTCCAACTC
MLOC_15776	BBR-BPC	HvFRF2	778	798	+	3.57895	1.24e-05	0.0331	ATCTCTTGTTTTCTCCAACTC
MLOC_15776	BBR-BPC	HvFRF9	793	813	+	3.57895	1.24e-05	0.0331	ATCTCTTGTTTTCTCCAACTC
MLOC_15776	BBR-BPC	HvFRF1	1763	1783	+	3.57895	1.24e-05	0.0331	ATCTCTTGTTTTCTCCAACTC
MLOC_15776	BBR-BPC	HvFRF14	359	379	+	3.23684	1.38e-05	0.0356	CACCCTTTCCCTCTTTTTCTG
MLOC_15776	BBR-BPC	HvFRF20	1827	1847	+	2.73684	1.6e-05	0.04	CTCTTTCTCCCTCTGCATCTT
MLOC_15776	BBR-BPC	HvFRF16	103	123	-	2.09211	1.94e-05	0.047	TAGTTTTTTTTTCTCTGATTC
MLOC_15776	BBR-BPC	HvFRF20	1819	1839	+	1.01316	2.66e-05	0.0577	CTTCACCTCTCTTTCTCCCTC
MLOC_15776	BBR-BPC	HvFRF11	599	619	+	0.894737	2.75e-05	0.0577	CCCTCCCCCTCTCCCCCACCC
MLOC_15776	BBR-BPC	HvFRF11	682	702	+	0.618421	2.98e-05	0.0577	CTTCTTCTTCCTCCCTCCCTA
MLOC_15776	BBR-BPC	HvFRF11	597	617	+	0.565789	3.02e-05	0.0577	TCCCCTCCCCCTCTCCCCCAC
MLOC_15776	BBR-BPC	HvFRF14	800	820	+	0.434211	3.14e-05	0.0577	ACCTCTCTTTCTCCCTCTGGA
MLOC_15776	BBR-BPC	HvFRF22	841	861	+	0.434211	3.14e-05	0.0577	ACCTCTCTTTCTCCCTCTGGA
MLOC_15776	BBR-BPC	HvFRF9	859	879	+	0.434211	3.14e-05	0.0577	ACCTCTCTTTCTCCCTCTGGA
MLOC_15776	BBR-BPC	HvFRF20	1823	1843	+	0.434211	3.14e-05	0.0577	ACCTCTCTTTCTCCCTCTGCA
MLOC_15776	BBR-BPC	HvFRF1	1829	1849	+	0.434211	3.14e-05	0.0577	ACCTCTCTTTCTCCCTCTGGA
MLOC_15776	BBR-BPC	HvFRF7	609	629	+	0.157895	3.39e-05	0.0577	TCCCCTCCCCCTCTCCCCCCC
MLOC_15776	BBR-BPC	HvFRF14	802	822	+	0.0921053	3.46e-05	0.0577	CTCTCTTTCTCCCTCTGGATC
MLOC_15776	BBR-BPC	HvFRF22	843	863	+	0.0921053	3.46e-05	0.0577	CTCTCTTTCTCCCTCTGGATC
MLOC_15776	BBR-BPC	HvFRF9	861	881	+	0.0921053	3.46e-05	0.0577	CTCTCTTTCTCCCTCTGGATC
MLOC_15776	BBR-BPC	HvFRF1	1831	1851	+	0.0921053	3.46e-05	0.0577	CTCTCTTTCTCCCTCTGGATC
MLOC_15776	BBR-BPC	HvFRF1	1793	1813	+	0.0526316	3.5e-05	0.0577	ACCCCTCTCTCTTTTTCTTTG
MLOC_15776	BBR-BPC	HvFRF20	917	937	-	-0.0394737	3.59e-05	0.0577	TCATCTCCCTATCTCACATTT
MLOC_15776	BBR-BPC	HvFRF22	409	429	+	-0.0921053	3.64e-05	0.0577	CACCCTTTCCTTCTTTTTCTG
MLOC_15776	BBR-BPC	HvFRF2	840	860	+	-0.131579	3.68e-05	0.0577	ATCCACCTCTCTTTATCCCTC
MLOC_15776	BBR-BPC	HvFRF7	991	1011	+	-0.565789	4.15e-05	0.0604	TTGCACCTCTCTCTCTCCTCT
MLOC_15776	BBR-BPC	HvFRF14	736	756	+	-0.631579	4.23e-05	0.0604	CTCTTATTTTCTCCAACTCAA
MLOC_15776	BBR-BPC	HvFRF22	777	797	+	-0.710526	4.32e-05	0.0604	CTCTTGTTTTCTCCAACTCAA
MLOC_15776	BBR-BPC	HvFRF2	780	800	+	-0.710526	4.32e-05	0.0604	CTCTTGTTTTCTCCAACTCAA
MLOC_15776	BBR-BPC	HvFRF9	795	815	+	-0.710526	4.32e-05	0.0604	CTCTTGTTTTCTCCAACTCAA
MLOC_15776	BBR-BPC	HvFRF1	1765	1785	+	-0.710526	4.32e-05	0.0604	CTCTTGTTTTCTCCAACTCAA
MLOC_15776	BBR-BPC	HvFRF5	782	802	+	-0.802632	4.44e-05	0.0604	GTTAGGTTTTATCTCTCTCTC
MLOC_15776	BBR-BPC	HvFRF7	611	631	+	-0.815789	4.45e-05	0.0604	CCCTCCCCCTCTCCCCCCCCA
MLOC_15776	BBR-BPC	HvFRF15	1960	1980	+	-0.934211	4.6e-05	0.0613	CCCTCTGTTCTTCTCTTTCGT
MLOC_15776	BBR-BPC	HvFRF7	696	716	+	-1.34211	5.14e-05	0.0663	CTCTTCTTCTTCCTCCCTCCC
MLOC_15776	BBR-BPC	HvFRF1	316	336	-	-1.35526	5.16e-05	0.0663	TTCACTTTTTTACTTTTACTA
MLOC_15776	BBR-BPC	HvFRF14	357	377	+	-1.39474	5.22e-05	0.0663	CCCACCCTTTCCCTCTTTTTC
MLOC_15776	BBR-BPC	HvFRF20	1817	1837	+	-1.52632	5.41e-05	0.067	ATCTTCACCTCTCTTTCTCCC
MLOC_15776	BBR-BPC	HvFRF2	434	454	+	-1.55263	5.45e-05	0.067	CTTTCCCTCTTTTTCTGTCTG
MLOC_15776	BBR-BPC	HvFRF21	126	146	+	-1.75	5.75e-05	0.0696	ATCTCCTTATCTCTAACTTAA
MLOC_15776	BBR-BPC	HvFRF17	955	975	+	-2.03947	6.21e-05	0.0742	CATTCTCTGTCTCTACAACAA
MLOC_15776	BBR-BPC	HvFRF14	355	375	+	-2.26316	6.6e-05	0.0765	GCCCCACCCTTTCCCTCTTTT
MLOC_15776	BBR-BPC	HvFRF2	430	450	+	-2.26316	6.6e-05	0.0765	CATCCTTTCCCTCTTTTTCTG
MLOC_15776	BBR-BPC	HvFRF21	114	134	+	-2.32895	6.71e-05	0.0767	AATTCTATCTCTATCTCCTTA
MLOC_15776	BBR-BPC	HvFRF20	1512	1532	+	-2.69737	7.41e-05	0.0804	CCCGTTTTCTTCCTCCCTCCC
MLOC_15776	BBR-BPC	HvFRF14	794	814	+	-2.76316	7.54e-05	0.0804	ATATCCACCTCTCTTTCTCCC
MLOC_15776	BBR-BPC	HvFRF22	835	855	+	-2.76316	7.54e-05	0.0804	ATATCCACCTCTCTTTCTCCC
MLOC_15776	BBR-BPC	HvFRF9	853	873	+	-2.76316	7.54e-05	0.0804	ATATCCACCTCTCTTTCTCCC
MLOC_15776	BBR-BPC	HvFRF1	1823	1843	+	-2.76316	7.54e-05	0.0804	ATATCCACCTCTCTTTCTCCC
MLOC_15776	BBR-BPC	HvFRF20	1508	1528	+	-2.88158	7.77e-05	0.0807	CACTCCCGTTTTCTTCCTCCC
MLOC_15776	BBR-BPC	HvFRF14	768	788	+	-3.02632	8.08e-05	0.0807	CTCTCTCTTTTTCTTGGCCCC
MLOC_15776	BBR-BPC	HvFRF22	809	829	+	-3.02632	8.08e-05	0.0807	CTCTCTCTTTTTCTTGGCCCC
MLOC_15776	BBR-BPC	HvFRF2	812	832	+	-3.02632	8.08e-05	0.0807	CTCTCTCTTTTTCTTGGCCCC
MLOC_15776	BBR-BPC	HvFRF9	827	847	+	-3.02632	8.08e-05	0.0807	CTCTCTCTTTTTCTTGGCCCC
MLOC_15776	BBR-BPC	HvFRF5	788	808	+	-3.14474	8.33e-05	0.0815	TTTTATCTCTCTCTCACGTGA
MLOC_15776	BBR-BPC	HvFRF7	965	985	+	-3.15789	8.36e-05	0.0815	CTATCTTTCTCTCTGCACCCA
MLOC_15776	BBR-BPC	HvFRF20	1510	1530	+	-3.26316	8.59e-05	0.0828	CTCCCGTTTTCTTCCTCCCTC
MLOC_15776	BBR-BPC	HvFRF7	686	706	+	-3.48684	9.11e-05	0.0867	ATCTCTTCTCCTCTTCTTCTT
MLOC_15776	BBR-BPC	HvFRF1	517	537	-	-3.67105	9.56e-05	0.0899	TTTTCTTGTTTTCTGTCTCTT
MLOC_15776	BBR-BPC	HvFRF8	731	751	+	-3.77632	9.82e-05	0.0913	CTTCTTCTCCCTCCACATCTA
MLOC_19022	BES1	HvFRF8	226	240	-	13.9091	9.66e-06	0.343	CCACACGTGTTCACA
MLOC_19022	BES1	HvFRF8	284	298	-	13.9091	9.66e-06	0.343	CCACACGTGTTCACA
MLOC_19022	BES1	HvFRF20	1356	1370	+	13.5303	1.18e-05	0.343	CGGCACGTGCCAGCC
MLOC_19022	BES1	HvFRF20	1353	1367	-	12.1212	2.32e-05	0.508	TGGCACGTGCCGCCG
MLOC_6679	BES1	HvFRF8	229	239	-	12.8636	2.51e-05	1	CACACGTGTTC
MLOC_6679	BES1	HvFRF8	287	297	-	12.8636	2.51e-05	1	CACACGTGTTC
MLOC_6679	BES1	HvFRF20	1356	1366	-	8.42424	5.81e-05	1	GGCACGTGCCG
MLOC_6679	BES1	HvFRF20	1357	1367	+	8.22727	5.99e-05	1	GGCACGTGCCA
MLOC_19022	BES1	HvFRF10	470	484	+	9.28788	6.87e-05	1	TCGCACGCGCGGCGC
MLOC_6679	BES1	HvFRF4	233	243	+	5.92424	8.89e-05	1	CACACGAGGGG
MLOC_77331	bHLH	HvFRF5	504	517	-	16.0658	1e-06	0.0876	CGGAGGTCACGTGG
MLOC_77331	bHLH	HvFRF15	21	34	+	14.4079	8.3e-06	0.363	TTAGAGTCACGTGA
MLOC_62335	bHLH	HvFRF15	19	33	-	14.303	9.5e-06	0.83	CACGTGACTCTAAAG
MLOC_56117	bHLH	HvFRF20	1353	1373	-	14	1.11e-05	0.964	CCAGGCTGGCACGTGCCGCCG
MLOC_71611	bHLH	HvFRF20	1358	1365	+	14.0482	1.17e-05	0.512	GCACGTGC
MLOC_71611	bHLH	HvFRF20	1358	1365	-	14.0482	1.17e-05	0.512	GCACGTGC
MLOC_57622	bHLH	HvFRF20	1358	1365	+	15.9858	1.17e-05	0.388	GCACGTGC
MLOC_57622	bHLH	HvFRF20	1358	1365	-	15.9858	1.17e-05	0.388	GCACGTGC
MLOC_33189	bHLH	HvFRF20	1358	1365	+	14.8222	1.17e-05	0.514	GCACGTGC
MLOC_33189	bHLH	HvFRF20	1358	1365	-	14.8222	1.17e-05	0.514	GCACGTGC
MLOC_13438	bHLH	HvFRF20	1359	1373	-	12.9778	1.38e-05	0.577	CCAGGCTGGCACGTG
MLOC_13438	bHLH	HvFRF17	230	244	-	12.4111	1.78e-05	0.577	CGTTGGTGCCACGTC
MLOC_13438	bHLH	HvFRF15	19	33	+	12.1556	1.98e-05	0.577	CTTTAGAGTCACGTG
MLOC_62335	bHLH	HvFRF5	505	519	+	13.197	2.01e-05	0.879	CACGTGACCTCCGGC
MLOC_13438	bHLH	HvFRF10	1150	1164	-	11.0222	3.21e-05	0.587	CGTCGGTGCCACGTC
MLOC_62335	bHLH	HvFRF20	1359	1373	+	12.3788	3.25e-05	0.945	CACGTGCCAGCCTGG
MLOC_13438	bHLH	HvFRF13	1833	1847	+	10.7556	3.56e-05	0.587	GGAGCGAGGCACGTC
MLOC_43438	bHLH	HvFRF20	1358	1365	-	12.9091	3.67e-05	1	GCACGTGC
MLOC_43438	bHLH	HvFRF20	1358	1365	+	12.9091	3.67e-05	1	GCACGTGC
MLOC_13438	bHLH	HvFRF1	1268	1282	-	10.4333	4.03e-05	0.587	CAGGAGCTGCACATG
MLOC_65463	bHLH	HvFRF5	503	511	+	12.0101	4.14e-05	1	GCCACGTGA
MLOC_56117	bHLH	HvFRF15	19	39	+	11.7237	4.35e-05	1	CTTTAGAGTCACGTGAATCAG
MLOC_56117	bHLH	HvFRF5	499	519	-	11.4342	5.01e-05	1	GCCGGAGGTCACGTGGCAATA
MLOC_77331	bHLH	HvFRF10	857	870	-	12.0395	5.04e-05	1	CGTGGGTGACGTGG
MLOC_57622	bHLH	HvFRF22	386	393	+	9.67376	5.31e-05	0.388	GCACGGGC
MLOC_57622	bHLH	HvFRF22	386	393	-	9.67376	5.31e-05	0.388	GCCCGTGC
MLOC_57622	bHLH	HvFRF2	407	414	+	9.67376	5.31e-05	0.388	GCACGGGC
MLOC_57622	bHLH	HvFRF2	407	414	-	9.67376	5.31e-05	0.388	GCCCGTGC
MLOC_57622	bHLH	HvFRF10	472	479	+	9.67376	5.31e-05	0.388	GCACGCGC
MLOC_57622	bHLH	HvFRF10	472	479	-	9.67376	5.31e-05	0.388	GCGCGTGC
MLOC_57622	bHLH	HvFRF17	675	682	+	9.67376	5.31e-05	0.388	GCCCGTGC
MLOC_57622	bHLH	HvFRF17	675	682	-	9.67376	5.31e-05	0.388	GCACGGGC
MLOC_57622	bHLH	HvFRF1	1379	1386	+	9.67376	5.31e-05	0.388	GCACGGGC
MLOC_57622	bHLH	HvFRF1	1379	1386	-	9.67376	5.31e-05	0.388	GCCCGTGC
MLOC_62335	bHLH	HvFRF5	802	816	+	11.2576	5.61e-05	1	CACGTGATCTGGGCT
MLOC_77331	bHLH	HvFRF20	1358	1371	-	11.8421	5.66e-05	1	AGGCTGGCACGTGC
MLOC_67834	bHLH	HvFRF8	1321	1329	-	13.2626	5.66e-05	1	ACCACTTGA
MLOC_67834	bHLH	HvFRF20	658	666	-	12.3434	6.01e-05	1	GCAACTTGC
MLOC_56117	bHLH	HvFRF15	22	42	-	10.9605	6.24e-05	1	TCTCTGATTCACGTGACTCTA
MLOC_65463	bHLH	HvFRF20	1358	1366	-	11.4747	6.45e-05	1	GGCACGTGC
MLOC_65463	bHLH	HvFRF20	1357	1365	+	11.4747	6.45e-05	1	GGCACGTGC
MLOC_33189	bHLH	HvFRF8	231	238	+	11.7333	6.5e-05	0.95	ACACGTGT
MLOC_33189	bHLH	HvFRF8	231	238	-	11.7333	6.5e-05	0.95	ACACGTGT
MLOC_33189	bHLH	HvFRF8	289	296	+	11.7333	6.5e-05	0.95	ACACGTGT
MLOC_33189	bHLH	HvFRF8	289	296	-	11.7333	6.5e-05	0.95	ACACGTGT
MLOC_56117	bHLH	HvFRF10	852	872	-	10.8553	6.54e-05	1	CGCGTGGGTGACGTGGCGTAT
MLOC_13438	bHLH	HvFRF5	701	715	-	8.92222	6.85e-05	0.855	CCTTTTTTGCACATG
MLOC_43438	bHLH	HvFRF5	504	511	+	12.1515	7.65e-05	1	CCACGTGA
MLOC_57622	bHLH	HvFRF21	1298	1305	+	9.51064	7.66e-05	0.48	GCACGAGC
MLOC_57622	bHLH	HvFRF21	1298	1305	-	9.51064	7.66e-05	0.48	GCTCGTGC
MLOC_67834	bHLH	HvFRF5	992	1000	+	11.5455	7.91e-05	1	GCAACTTGT
MLOC_62335	bHLH	HvFRF1	1259	1273	-	10.3485	8.07e-05	1	CACATGACTCTCATG
MLOC_67834	bHLH	HvFRF11	167	175	+	11.3939	8.66e-05	1	CCAACTTGG
MLOC_71611	bHLH	HvFRF1	1104	1111	+	11.3735	8.82e-05	0.643	GCATGTGC
MLOC_71611	bHLH	HvFRF1	1104	1111	-	11.3735	8.82e-05	0.643	GCACATGC
MLOC_71611	bHLH	HvFRF11	1353	1360	+	11.3735	8.82e-05	0.643	GCATGTGC
MLOC_71611	bHLH	HvFRF11	1353	1360	-	11.3735	8.82e-05	0.643	GCACATGC
MLOC_71611	bHLH	HvFRF7	1371	1378	+	11.3735	8.82e-05	0.643	GCATGTGC
MLOC_71611	bHLH	HvFRF7	1371	1378	-	11.3735	8.82e-05	0.643	GCACATGC
MLOC_71611	bHLH	HvFRF19	1387	1394	+	11.3735	8.82e-05	0.643	GCATGTGC
MLOC_71611	bHLH	HvFRF19	1387	1394	-	11.3735	8.82e-05	0.643	GCACATGC
MLOC_71611	bHLH	HvFRF19	1774	1781	+	11.3735	8.82e-05	0.643	GCATGTGC
MLOC_71611	bHLH	HvFRF19	1774	1781	-	11.3735	8.82e-05	0.643	GCACATGC
MLOC_62335	bHLH	HvFRF5	793	807	-	10.0758	8.89e-05	1	CACGTGAGAGAGAGA
MLOC_67834	bHLH	HvFRF6	844	852	-	11.2525	9.06e-05	1	CCAACTTGT
MLOC_56117	bHLH	HvFRF5	796	816	-	9.93421	9.53e-05	1	AGCCCAGATCACGTGAGAGAG
MLOC_56117	bHLH	HvFRF20	1350	1370	+	9.82895	9.92e-05	1	GCACGGCGGCACGTGCCAGCC
MLOC_6534	bZIP	HvFRF5	502	516	-	20.3333	4.45e-08	0.00389	GGAGGTCACGTGGCA
MLOC_63066	bZIP	HvFRF5	502	516	-	19.7727	8.71e-08	0.00761	GGAGGTCACGTGGCA
MLOC_34679	bZIP	HvFRF5	500	517	-	19.5152	1.3e-07	0.0114	CGGAGGTCACGTGGCAAT
MLOC_6711	bZIP	HvFRF5	502	516	+	18.8333	2.88e-07	0.0251	TGCCACGTGACCTCC
MLOC_6711	bZIP	HvFRF10	855	869	+	17.303	1.07e-06	0.0467	CGCCACGTCACCCAC
MLOC_63436	bZIP	HvFRF10	855	869	-	16.7576	1.42e-06	0.104	GTGGGTGACGTGGCG
MLOC_34679	bZIP	HvFRF10	853	870	-	16.9394	1.55e-06	0.0675	CGTGGGTGACGTGGCGTA
MLOC_63066	bZIP	HvFRF10	855	869	-	16.9394	1.57e-06	0.0686	GTGGGTGACGTGGCG
MLOC_52112	bZIP	HvFRF10	855	869	-	16.7121	1.62e-06	0.141	GTGGGTGACGTGGCG
MLOC_81003	bZIP	HvFRF10	856	867	-	14.5556	1.78e-06	0.156	GGGTGACGTGGC
MLOC_6534	bZIP	HvFRF10	855	869	-	16.6667	1.91e-06	0.0834	GTGGGTGACGTGGCG
MLOC_51930	bZIP	HvFRF10	855	869	-	16.0909	2.08e-06	0.169	GTGGGTGACGTGGCG
MLOC_6711	bZIP	HvFRF17	32	46	-	15.6364	3.38e-06	0.0981	AGCCACGTCGGCTCC
MLOC_63436	bZIP	HvFRF17	32	46	+	14.8939	3.7e-06	0.104	GGAGCCGACGTGGCT
MLOC_51930	bZIP	HvFRF17	32	46	+	14.8636	4.05e-06	0.169	GGAGCCGACGTGGCT
MLOC_63066	bZIP	HvFRF10	1144	1158	+	15.303	4.39e-06	0.106	ATGACCGACGTGGCA
MLOC_52112	bZIP	HvFRF21	369	383	+	15.1212	4.84e-06	0.181	AGTGACGACGTGGAC
MLOC_63066	bZIP	HvFRF17	224	238	+	15.1212	4.86e-06	0.106	GTGACCGACGTGGCA
MLOC_6711	bZIP	HvFRF10	1144	1158	-	14.7424	5.66e-06	0.104	TGCCACGTCGGTCAT
MLOC_6711	bZIP	HvFRF17	224	238	-	14.6515	5.95e-06	0.104	TGCCACGTCGGTCAC
MLOC_81003	bZIP	HvFRF10	966	977	+	13.798	6.37e-06	0.199	CGCCGACGTGGC
MLOC_71198	bZIP	HvFRF15	1382	1393	-	14.7273	7.02e-06	0.465	TTGACAGCTATC
MLOC_63436	bZIP	HvFRF21	369	383	+	13.3788	7.16e-06	0.104	AGTGACGACGTGGAC
MLOC_63436	bZIP	HvFRF3	1469	1483	-	13.2879	7.45e-06	0.104	AACAATGACGTGTCA
MLOC_63436	bZIP	HvFRF17	224	238	+	13.2424	7.57e-06	0.104	GTGACCGACGTGGCA
MLOC_52112	bZIP	HvFRF3	1469	1483	-	14.3333	7.66e-06	0.181	AACAATGACGTGTCA
MLOC_63436	bZIP	HvFRF10	964	978	+	13.1212	7.96e-06	0.104	GGCGCCGACGTGGCT
MLOC_81003	bZIP	HvFRF17	34	45	+	13.6162	8.09e-06	0.199	AGCCGACGTGGC
MLOC_52112	bZIP	HvFRF4	671	685	+	14.197	8.26e-06	0.181	ATGGATGACGTCTAC
MLOC_63436	bZIP	HvFRF10	1144	1158	+	13.0152	8.33e-06	0.104	ATGACCGACGTGGCA
MLOC_51930	bZIP	HvFRF5	502	516	-	13.2879	8.56e-06	0.169	GGAGGTCACGTGGCA
MLOC_51930	bZIP	HvFRF21	369	383	+	13.2424	8.73e-06	0.169	AGTGACGACGTGGAC
MLOC_81003	bZIP	HvFRF5	503	514	-	13.5152	9.09e-06	0.199	AGGTCACGTGGC
MLOC_6534	bZIP	HvFRF10	1144	1158	+	13.7576	9.57e-06	0.211	ATGACCGACGTGGCA
MLOC_51930	bZIP	HvFRF10	964	978	+	13	9.67e-06	0.169	GGCGCCGACGTGGCT
MLOC_6711	bZIP	HvFRF10	964	978	-	13.6061	1.01e-05	0.147	AGCCACGTCGGCGCC
MLOC_71198	bZIP	HvFRF18	1608	1619	-	14.1515	1.07e-05	0.465	TCGACAGCTGAA
MLOC_6062	bZIP	HvFRF17	34	45	-	10.8667	1.07e-05	0.43	GCCACGTCGGCT
MLOC_63066	bZIP	HvFRF17	32	46	+	13.4545	1.12e-05	0.196	GGAGCCGACGTGGCT
MLOC_6534	bZIP	HvFRF3	1469	1483	-	13.3485	1.14e-05	0.211	AACAATGACGTGTCA
MLOC_34679	bZIP	HvFRF10	1143	1160	+	13.3939	1.14e-05	0.242	AATGACCGACGTGGCACC
MLOC_81003	bZIP	HvFRF5	71	82	+	13.2727	1.21e-05	0.211	GTTTGACGTGGC
MLOC_6534	bZIP	HvFRF17	224	238	+	13.2121	1.21e-05	0.211	GTGACCGACGTGGCA
MLOC_34679	bZIP	HvFRF17	223	240	+	13.197	1.24e-05	0.242	AGTGACCGACGTGGCACC
MLOC_6062	bZIP	HvFRF10	856	867	+	10.0444	1.38e-05	0.43	GCCACGTCACCC
MLOC_34679	bZIP	HvFRF3	1467	1484	-	12.9242	1.39e-05	0.242	AAACAATGACGTGTCAAC
MLOC_60045	bZIP	HvFRF7	530	540	-	13.5455	1.43e-05	0.188	ACAGGCTGGCA
MLOC_60045	bZIP	HvFRF19	565	575	-	13.5455	1.43e-05	0.188	ACAGGCTGGCA
MLOC_51930	bZIP	HvFRF3	1469	1483	-	12.0606	1.44e-05	0.186	AACAATGACGTGTCA
MLOC_20326	bZIP	HvFRF8	231	238	+	15.6312	1.5e-05	0.329	ACACGTGT
MLOC_20326	bZIP	HvFRF8	231	238	-	15.6312	1.5e-05	0.329	ACACGTGT
MLOC_20326	bZIP	HvFRF8	289	296	+	15.6312	1.5e-05	0.329	ACACGTGT
MLOC_20326	bZIP	HvFRF8	289	296	-	15.6312	1.5e-05	0.329	ACACGTGT
MLOC_51930	bZIP	HvFRF17	224	238	+	11.8636	1.56e-05	0.186	GTGACCGACGTGGCA
MLOC_52112	bZIP	HvFRF10	1098	1112	+	12.9394	1.57e-05	0.235	ATCGGCGACGTGACC
MLOC_6062	bZIP	HvFRF19	1607	1618	-	9.6	1.66e-05	0.43	GCCATGTCTGAA
MLOC_52112	bZIP	HvFRF10	964	978	+	12.803	1.68e-05	0.235	GGCGCCGACGTGGCT
MLOC_6711	bZIP	HvFRF21	369	383	-	12.4697	1.68e-05	0.209	GTCCACGTCGTCACT
MLOC_51930	bZIP	HvFRF10	1144	1158	+	11.6364	1.7e-05	0.186	ATGACCGACGTGGCA
MLOC_6534	bZIP	HvFRF17	32	46	+	12.0758	1.84e-05	0.269	GGAGCCGACGTGGCT
MLOC_34679	bZIP	HvFRF17	31	48	+	12.1364	1.87e-05	0.272	CGGAGCCGACGTGGCTCC
MLOC_52112	bZIP	HvFRF17	32	46	+	12.4242	2.01e-05	0.235	GGAGCCGACGTGGCT
MLOC_63066	bZIP	HvFRF10	964	978	+	12.0303	2.04e-05	0.297	GGCGCCGACGTGGCT
MLOC_52112	bZIP	HvFRF17	178	192	+	12.2879	2.15e-05	0.235	ACCGGCGACGTGACC
MLOC_60045	bZIP	HvFRF14	310	320	-	13.1061	2.15e-05	0.188	CCAGGCTGGCA
MLOC_60045	bZIP	HvFRF22	361	371	-	13.1061	2.15e-05	0.188	CCAGGCTGGCA
MLOC_60045	bZIP	HvFRF9	377	387	-	13.1061	2.15e-05	0.188	CCAGGCTGGCA
MLOC_60045	bZIP	HvFRF2	382	392	-	13.1061	2.15e-05	0.188	CCAGGCTGGCA
MLOC_60045	bZIP	HvFRF7	490	500	-	13.1061	2.15e-05	0.188	CCAGGCTGGCA
MLOC_60045	bZIP	HvFRF19	525	535	-	13.1061	2.15e-05	0.188	CCAGGCTGGCA
MLOC_60045	bZIP	HvFRF1	1354	1364	-	13.1061	2.15e-05	0.188	CCAGGCTGGCA
MLOC_60045	bZIP	HvFRF20	1363	1373	-	13.1061	2.15e-05	0.188	CCAGGCTGGCA
MLOC_61530	bZIP	HvFRF4	673	683	-	12.8788	2.18e-05	1	AGACGTCATCC
MLOC_6711	bZIP	HvFRF3	1469	1483	+	11.7273	2.25e-05	0.245	TGACACGTCATTGTT
MLOC_81003	bZIP	HvFRF17	226	237	+	12.6869	2.32e-05	0.29	GACCGACGTGGC
MLOC_81003	bZIP	HvFRF10	1146	1157	+	12.6869	2.32e-05	0.29	GACCGACGTGGC
MLOC_6062	bZIP	HvFRF10	966	977	-	8.48889	2.43e-05	0.43	GCCACGTCGGCG
MLOC_6062	bZIP	HvFRF21	371	382	-	8.44444	2.46e-05	0.43	TCCACGTCGTCA
MLOC_63066	bZIP	HvFRF3	1469	1483	-	11.5	2.48e-05	0.31	AACAATGACGTGTCA
MLOC_34679	bZIP	HvFRF21	368	385	+	11.2576	2.51e-05	0.312	TAGTGACGACGTGGACGC
MLOC_62430	bZIP	HvFRF5	504	511	-	13.9909	2.65e-05	0.559	TCACGTGG
MLOC_62430	bZIP	HvFRF10	857	864	-	13.9909	2.65e-05	0.559	TGACGTGG
MLOC_62430	bZIP	HvFRF5	74	81	+	13.9909	2.65e-05	0.559	TGACGTGG
MLOC_62430	bZIP	HvFRF18	1105	1112	+	13.9909	2.65e-05	0.559	TGACGTGG
MLOC_6711	bZIP	HvFRF5	69	83	-	11.2121	2.73e-05	0.265	AGCCACGTCAAACCA
MLOC_53321	bZIP	HvFRF8	231	238	-	14.2846	2.83e-05	0.62	ACACGTGT
MLOC_53321	bZIP	HvFRF8	289	296	-	14.2846	2.83e-05	0.62	ACACGTGT
MLOC_53321	bZIP	HvFRF8	231	238	+	14.2846	2.83e-05	0.62	ACACGTGT
MLOC_53321	bZIP	HvFRF8	289	296	+	14.2846	2.83e-05	0.62	ACACGTGT
MLOC_60045	bZIP	HvFRF15	1382	1392	+	12.7273	3.01e-05	0.24	GATAGCTGTCA
MLOC_81003	bZIP	HvFRF18	1102	1113	+	12.4646	3.02e-05	0.32	AAATGACGTGGT
MLOC_34679	bZIP	HvFRF10	963	980	+	10.2727	3.34e-05	0.33	CGGCGCCGACGTGGCTCC
MLOC_34679	bZIP	HvFRF5	68	85	+	10.197	3.41e-05	0.33	ATGGTTTGACGTGGCTAC
MLOC_6534	bZIP	HvFRF10	964	978	+	9.93939	3.48e-05	0.429	GGCGCCGACGTGGCT
MLOC_81003	bZIP	HvFRF3	1630	1641	+	12.2323	3.69e-05	0.32	GCCAGACGTGGA
MLOC_64781	bZIP	HvFRF13	1541	1551	+	10.4079	3.77e-05	0.914	TACAGCTGGAC
MLOC_64781	bZIP	HvFRF13	1540	1550	-	10.3947	3.82e-05	0.914	TCCAGCTGTAT
MLOC_52112	bZIP	HvFRF18	1100	1114	+	10.9394	3.92e-05	0.38	TCAAATGACGTGGTT
MLOC_63066	bZIP	HvFRF5	69	83	+	10.1212	3.98e-05	0.432	TGGTTTGACGTGGCT
MLOC_81003	bZIP	HvFRF15	896	907	+	12.1212	4.02e-05	0.32	GGGAGACGTGGG
MLOC_34679	bZIP	HvFRF21	554	571	+	9.45455	4.12e-05	0.359	AGCTGTAGACGTGGACGA
MLOC_51930	bZIP	HvFRF4	671	685	+	9.07576	4.27e-05	0.414	ATGGATGACGTCTAC
MLOC_6062	bZIP	HvFRF5	71	82	-	6.82222	4.32e-05	0.503	GCCACGTCAAAC
MLOC_6534	bZIP	HvFRF5	69	83	+	9.0303	4.32e-05	0.429	TGGTTTGACGTGGCT
MLOC_81003	bZIP	HvFRF21	371	382	+	12.0404	4.34e-05	0.32	TGACGACGTGGA
MLOC_81003	bZIP	HvFRF21	557	568	+	12.0303	4.39e-05	0.32	TGTAGACGTGGA
MLOC_6534	bZIP	HvFRF21	369	383	+	8.93939	4.41e-05	0.429	AGTGACGACGTGGAC
MLOC_71198	bZIP	HvFRF20	1382	1393	+	11.5152	4.41e-05	1	TTTCCAGCTATT
MLOC_63066	bZIP	HvFRF21	369	383	+	9.77273	4.45e-05	0.432	AGTGACGACGTGGAC
MLOC_60045	bZIP	HvFRF4	1174	1184	-	12.0455	4.57e-05	0.334	CCAAGCTGTCG
MLOC_71198	bZIP	HvFRF13	1539	1550	+	11.4091	4.62e-05	1	TATACAGCTGGA
MLOC_6062	bZIP	HvFRF21	557	568	-	6.46667	4.77e-05	0.503	TCCACGTCTACA
MLOC_68986	bZIP	HvFRF4	671	685	+	10.4242	4.85e-05	1	ATGGATGACGTCTAC
MLOC_61530	bZIP	HvFRF20	1089	1099	-	11.4091	4.89e-05	1	CGACGTCACGA
MLOC_6062	bZIP	HvFRF21	715	726	-	6.42222	4.9e-05	0.503	TCCACGACTGCA
MLOC_63436	bZIP	HvFRF3	226	240	-	7.83333	5.03e-05	0.549	AATGATTACCTGGAA
MLOC_64781	bZIP	HvFRF14	137	147	+	9.60526	5.06e-05	0.914	TCCAGCTGGTG
MLOC_64008	bZIP	HvFRF13	1886	1905	-	8.5303	5.07e-05	1	ATTGATGTCATTTTCTTCAT
MLOC_51930	bZIP	HvFRF3	226	240	-	8.51515	5.12e-05	0.447	AATGATTACCTGGAA
MLOC_52112	bZIP	HvFRF16	1408	1422	-	10.303	5.13e-05	0.412	AGCAACGACGTGACC
MLOC_22013	bZIP	HvFRF21	700	709	-	11.3836	5.24e-05	1	ATGGCGTCAC
MLOC_62430	bZIP	HvFRF21	560	567	+	12.6818	5.31e-05	0.559	AGACGTGG
MLOC_62430	bZIP	HvFRF15	899	906	+	12.6818	5.31e-05	0.559	AGACGTGG
MLOC_62430	bZIP	HvFRF3	1633	1640	+	12.6818	5.31e-05	0.559	AGACGTGG
MLOC_6062	bZIP	HvFRF5	503	514	+	6.13333	5.63e-05	0.503	GCCACGTGACCT
MLOC_51930	bZIP	HvFRF18	1563	1577	+	8.19697	5.66e-05	0.449	CAGGATTACGTGGTG
MLOC_63436	bZIP	HvFRF18	1563	1577	+	7.43939	5.66e-05	0.549	CAGGATTACGTGGTG
MLOC_61530	bZIP	HvFRF10	857	867	+	11.1061	5.68e-05	1	CCACGTCACCC
MLOC_22013	bZIP	HvFRF21	700	709	+	11.2329	5.89e-05	1	GTGACGCCAT
MLOC_52112	bZIP	HvFRF17	8	22	-	9.92424	5.96e-05	0.412	GGTGGAGACGTCGCG
MLOC_52112	bZIP	HvFRF10	940	954	-	9.92424	5.96e-05	0.412	GGTGGAGACGTCGCG
MLOC_6062	bZIP	HvFRF17	96	107	-	5.91111	6.1e-05	0.503	GCGACGTCTGCT
MLOC_6062	bZIP	HvFRF19	431	442	-	5.73333	6.33e-05	0.503	GCTATGTCAGCT
MLOC_64008	bZIP	HvFRF12	612	631	-	7.80303	6.34e-05	1	TTTGACATAATCTTCATTTT
MLOC_64781	bZIP	HvFRF18	1608	1618	+	8.82895	6.45e-05	0.914	TTCAGCTGTCG
MLOC_60045	bZIP	HvFRF18	1608	1618	+	11.4697	6.58e-05	0.441	TTCAGCTGTCG
MLOC_6711	bZIP	HvFRF21	555	569	-	8.5	6.61e-05	0.576	GTCCACGTCTACAGC
MLOC_81003	bZIP	HvFRF3	1470	1481	-	11.5354	6.63e-05	0.446	CAATGACGTGTC
MLOC_17690	bZIP	HvFRF3	23	33	-	9.06061	6.69e-05	1	GAAGATGTCAT
MLOC_64781	bZIP	HvFRF19	1750	1760	-	8.60526	6.87e-05	0.914	AGCAGCTGTAA
MLOC_52112	bZIP	HvFRF17	224	238	+	9.54545	6.91e-05	0.412	GTGACCGACGTGGCA
MLOC_52112	bZIP	HvFRF20	1087	1101	+	9.5303	6.95e-05	0.412	CGTCGTGACGTCGAC
MLOC_60045	bZIP	HvFRF3	1905	1915	-	11.3636	7.06e-05	0.441	CCAAGCTGTCC
MLOC_52112	bZIP	HvFRF10	1144	1158	+	9.48485	7.08e-05	0.412	ATGACCGACGTGGCA
MLOC_64781	bZIP	HvFRF18	680	690	+	8.47368	7.25e-05	0.914	GGCAGCTGTTA
MLOC_71198	bZIP	HvFRF13	1541	1552	-	10.3636	7.26e-05	1	GGTCCAGCTGTA
MLOC_63436	bZIP	HvFRF5	69	83	+	6.5303	7.4e-05	0.613	TGGTTTGACGTGGCT
MLOC_62430	bZIP	HvFRF17	37	44	+	11.8727	7.65e-05	0.559	CGACGTGG
MLOC_62430	bZIP	HvFRF17	229	236	+	11.8727	7.65e-05	0.559	CGACGTGG
MLOC_62430	bZIP	HvFRF21	374	381	+	11.8727	7.65e-05	0.559	CGACGTGG
MLOC_62430	bZIP	HvFRF10	969	976	+	11.8727	7.65e-05	0.559	CGACGTGG
MLOC_62430	bZIP	HvFRF10	1149	1156	+	11.8727	7.65e-05	0.559	CGACGTGG
MLOC_63436	bZIP	HvFRF18	1100	1114	+	6.37879	7.72e-05	0.613	TCAAATGACGTGGTT
MLOC_64008	bZIP	HvFRF12	858	877	-	7.10606	7.77e-05	1	GGTGATGTAATGGATGAAAC
MLOC_22013	bZIP	HvFRF18	175	184	+	10.7329	7.84e-05	1	TTGATGTCAT
MLOC_22013	bZIP	HvFRF13	1895	1904	-	10.7329	7.84e-05	1	TTGATGTCAT
MLOC_52112	bZIP	HvFRF18	1563	1577	+	9.19697	7.89e-05	0.431	CAGGATTACGTGGTG
MLOC_64008	bZIP	HvFRF18	174	193	+	7.04545	7.91e-05	1	TTTGATGTCATTTTTTATTA
MLOC_51930	bZIP	HvFRF18	1100	1114	+	7.07576	7.97e-05	0.484	TCAAATGACGTGGTT
MLOC_17690	bZIP	HvFRF10	856	866	-	8.39394	8.05e-05	1	GGTGACGTGGC
MLOC_51930	bZIP	HvFRF5	69	83	+	7.01515	8.11e-05	0.484	TGGTTTGACGTGGCT
MLOC_6534	bZIP	HvFRF21	555	569	+	5.69697	8.19e-05	0.716	GCTGTAGACGTGGAC
MLOC_64008	bZIP	HvFRF1	1214	1233	-	6.90909	8.22e-05	1	TTTGACGTAACAAAAGTAGA
MLOC_64781	bZIP	HvFRF14	136	146	-	8.05263	8.23e-05	0.914	ACCAGCTGGAC
MLOC_71198	bZIP	HvFRF21	1874	1885	-	10.0455	8.32e-05	1	TTTCCAGCTAGG
MLOC_64781	bZIP	HvFRF20	1429	1439	-	7.97368	8.35e-05	0.914	AACAGCTGTTT
MLOC_63066	bZIP	HvFRF21	555	569	+	7.51515	8.38e-05	0.733	GCTGTAGACGTGGAC
MLOC_64008	bZIP	HvFRF4	961	980	+	6.83333	8.4e-05	1	TGTGATGTAACTGTTTTATA
MLOC_51930	bZIP	HvFRF17	181	195	-	6.89394	8.41e-05	0.484	GAGGGTCACGTCGCC
MLOC_51930	bZIP	HvFRF10	1101	1115	-	6.89394	8.41e-05	0.484	GAGGGTCACGTCGCC
MLOC_6062	bZIP	HvFRF3	1881	1892	+	4.71111	8.42e-05	0.614	TCCACGTTTGCT
MLOC_34679	bZIP	HvFRF3	1627	1644	+	5.37879	8.58e-05	0.68	CGCGCCAGACGTGGAGGC
MLOC_51930	bZIP	HvFRF10	1098	1112	+	6.71212	8.86e-05	0.484	ATCGGCGACGTGACC
MLOC_17690	bZIP	HvFRF17	97	107	+	8.10606	9.09e-05	1	GCAGACGTCGC
MLOC_17690	bZIP	HvFRF12	867	877	-	8.09091	9.17e-05	1	GGTGATGTAAT
MLOC_68986	bZIP	HvFRF10	855	869	-	8.86364	9.22e-05	1	GTGGGTGACGTGGCG
MLOC_71198	bZIP	HvFRF19	818	829	-	9.68182	9.32e-05	1	TAGACAACTGTA
MLOC_6534	bZIP	HvFRF21	1503	1517	-	4.87879	9.4e-05	0.747	AGAGGACAAGTGTCA
MLOC_6711	bZIP	HvFRF3	226	240	+	7.21212	9.52e-05	0.754	TTCCAGGTAATCATT
MLOC_81003	bZIP	HvFRF17	182	193	-	11.0404	9.53e-05	0.556	GGGTCACGTCGC
MLOC_81003	bZIP	HvFRF10	1102	1113	-	11.0404	9.53e-05	0.556	GGGTCACGTCGC
MLOC_6062	bZIP	HvFRF10	387	398	-	4.27778	9.66e-05	0.65	GCCATGACAGAA
MLOC_61530	bZIP	HvFRF22	131	141	-	9.95455	9.76e-05	1	CCACATCATCT
MLOC_3855	C2H2	HvFRF7	692	710	+	21.5952	2.28e-08	0.00188	TCTCCTCTTCTTCTTCCTC
MLOC_57518	C2H2	HvFRF19	1260	1277	-	19.6364	1.64e-07	0.00729	AAAAACACGACAAAACAA
MLOC_57518	C2H2	HvFRF7	1243	1260	-	19.5455	1.76e-07	0.00729	AAAAACACGACAAAAACA
MLOC_3855	C2H2	HvFRF11	676	694	+	18.9365	1.89e-07	0.00633	TCTCCCCTTCTTCTTCCTC
MLOC_78652	C2H2	HvFRF19	1258	1277	-	19.2576	2.23e-07	0.0105	AAAAACACGACAAAACAACA
MLOC_3855	C2H2	HvFRF7	689	707	+	18.6667	2.3e-07	0.00633	TCTTCTCCTCTTCTTCTTC
MLOC_78652	C2H2	HvFRF7	1241	1260	-	19.1061	2.5e-07	0.0105	AAAAACACGACAAAAACAAC
MLOC_3855	C2H2	HvFRF16	597	615	-	17.881	4.07e-07	0.0074	CTTCATCTTCTTCCTTTTC
MLOC_14363	C2H2	HvFRF19	1261	1277	-	18.4394	4.18e-07	0.0195	AAAAACACGACAAAACA
MLOC_3855	C2H2	HvFRF16	600	618	-	17.6984	4.64e-07	0.0074	CTTCTTCATCTTCTTCCTT
MLOC_14363	C2H2	HvFRF7	1244	1260	-	18.2879	4.67e-07	0.0195	AAAAACACGACAAAAAC
MLOC_3855	C2H2	HvFRF7	695	713	+	17.4921	5.38e-07	0.0074	CCTCTTCTTCTTCCTCCCT
MLOC_60958	C2H2	HvFRF7	1244	1260	-	17.3788	7.9e-07	0.0384	AAAAACACGACAAAAAC
MLOC_60958	C2H2	HvFRF19	1261	1277	-	17.1212	9.2e-07	0.0384	AAAAACACGACAAAACA
MLOC_3855	C2H2	HvFRF19	650	668	+	16.5873	1e-06	0.00749	CCTCCCCCTCACCCACCAC
MLOC_3855	C2H2	HvFRF8	731	749	+	16.5317	1.04e-06	0.00749	CTTCTTCTCCCTCCACATC
MLOC_3855	C2H2	HvFRF10	1736	1754	-	16.1825	1.32e-06	0.00749	CATTATCATCATCCTCATC
MLOC_3855	C2H2	HvFRF17	1947	1965	-	16.1825	1.32e-06	0.00749	CATTATCATCATCCTCATC
MLOC_3855	C2H2	HvFRF10	1739	1757	-	15.9762	1.51e-06	0.00749	CATCATTATCATCATCCTC
MLOC_3855	C2H2	HvFRF17	1950	1968	-	15.9762	1.51e-06	0.00749	CATCATTATCATCATCCTC
MLOC_3855	C2H2	HvFRF8	728	746	+	15.9127	1.57e-06	0.00749	CATCTTCTTCTCCCTCCAC
MLOC_3855	C2H2	HvFRF10	1742	1760	-	15.8968	1.59e-06	0.00749	CCTCATCATTATCATCATC
MLOC_3855	C2H2	HvFRF17	1953	1971	-	15.8968	1.59e-06	0.00749	CCTCATCATTATCATCATC
MLOC_3855	C2H2	HvFRF19	641	659	+	15.627	1.9e-06	0.00749	TCTCCCTCCCCTCCCCCTC
MLOC_3855	C2H2	HvFRF19	718	736	+	15.5556	1.99e-06	0.00749	TTCCCCCTTCTTCTTCCTC
MLOC_3855	C2H2	HvFRF10	1712	1730	-	15.4841	2.08e-06	0.00749	CATCATCCTCATCATTATC
MLOC_3855	C2H2	HvFRF10	1748	1766	-	15.4841	2.08e-06	0.00749	CATCATCCTCATCATTATC
MLOC_3855	C2H2	HvFRF17	1941	1959	-	15.4841	2.08e-06	0.00749	CATCATCCTCATCATTATC
MLOC_3855	C2H2	HvFRF17	1959	1977	-	15.4841	2.08e-06	0.00749	CATCATCCTCATCATTATC
MLOC_3855	C2H2	HvFRF8	734	752	+	15.3492	2.27e-06	0.00749	CTTCTCCCTCCACATCTAC
MLOC_3855	C2H2	HvFRF11	682	700	+	15.2937	2.35e-06	0.00749	CTTCTTCTTCCTCCCTCCC
MLOC_3855	C2H2	HvFRF7	698	716	+	15.2937	2.35e-06	0.00749	CTTCTTCTTCCTCCCTCCC
MLOC_3855	C2H2	HvFRF19	724	742	+	15.2937	2.35e-06	0.00749	CTTCTTCTTCCTCCCTCCC
MLOC_3855	C2H2	HvFRF11	673	691	+	15.2698	2.39e-06	0.00749	TCTTCTCCCCTTCTTCTTC
MLOC_3855	C2H2	HvFRF11	679	697	+	15.1746	2.54e-06	0.00749	CCCCTTCTTCTTCCTCCCT
MLOC_3855	C2H2	HvFRF19	721	739	+	15.1746	2.54e-06	0.00749	CCCCTTCTTCTTCCTCCCT
MLOC_23443	C2H2	HvFRF5	779	796	-	15.5775	2.61e-06	0.222	GAGATAAAACCTAACCTG
MLOC_3855	C2H2	HvFRF8	765	783	+	15.0794	2.7e-06	0.00768	CCTCCCCATCTTCTTCTCC
MLOC_3855	C2H2	HvFRF7	612	630	+	14.5794	3.7e-06	0.0102	CCTCCCCCTCTCCCCCCCC
MLOC_3855	C2H2	HvFRF8	1875	1893	-	14.3889	4.17e-06	0.0108	CTTCATCATCATTTTCATC
MLOC_3855	C2H2	HvFRF16	603	621	-	14.381	4.19e-06	0.0108	ATTCTTCTTCATCTTCTTC
MLOC_60958	C2H2	HvFRF5	1140	1156	+	14.3182	4.31e-06	0.0999	CAAAAACTGACAAAAAC
MLOC_3855	C2H2	HvFRF8	762	780	+	14.3095	4.38e-06	0.011	TTCCCTCCCCATCTTCTTC
MLOC_76196	C2H2	HvFRF8	188	200	+	11.9192	4.61e-06	0.404	TAACAGTGTACTG
MLOC_3855	C2H2	HvFRF10	1745	1763	-	14.2063	4.67e-06	0.011	CATCCTCATCATTATCATC
MLOC_3855	C2H2	HvFRF17	1956	1974	-	14.2063	4.67e-06	0.011	CATCCTCATCATTATCATC
MLOC_29808	C2H2	HvFRF4	191	201	+	12.2727	4.72e-06	0.413	AAGTGAAGTTA
MLOC_1876	C2H2	HvFRF17	1668	1679	+	12.4314	4.93e-06	0.213	TTTCCTTTTGCG
MLOC_3855	C2H2	HvFRF19	647	665	+	14.0635	5.09e-06	0.0117	TCCCCTCCCCCTCACCCAC
MLOC_3855	C2H2	HvFRF21	237	255	+	14.0079	5.27e-06	0.0117	TCTCCACCGCATCATCATC
MLOC_3855	C2H2	HvFRF18	1070	1088	-	13.7857	6.03e-06	0.0117	CCTCACTATCCCCCACCTC
MLOC_3855	C2H2	HvFRF10	1682	1700	-	13.7619	6.12e-06	0.0117	CATTGTCATCATCCTCATC
MLOC_3855	C2H2	HvFRF10	1718	1736	-	13.7619	6.12e-06	0.0117	CATTGTCATCATCCTCATC
MLOC_3855	C2H2	HvFRF10	1754	1772	-	13.7619	6.12e-06	0.0117	CATTGTCATCATCCTCATC
MLOC_3855	C2H2	HvFRF17	1965	1983	-	13.7619	6.12e-06	0.0117	CATTGTCATCATCCTCATC
MLOC_3855	C2H2	HvFRF10	1688	1706	-	13.7381	6.21e-06	0.0117	CCTCATCATTGTCATCATC
MLOC_3855	C2H2	HvFRF10	1724	1742	-	13.7381	6.21e-06	0.0117	CCTCATCATTGTCATCATC
MLOC_60958	C2H2	HvFRF4	943	959	-	13.4242	6.69e-06	0.0999	TACAAACAAACAAAATA
MLOC_3855	C2H2	HvFRF8	759	777	+	13.5714	6.86e-06	0.0126	CTTTTCCCTCCCCATCTTC
MLOC_57518	C2H2	HvFRF5	1140	1157	+	13.5758	7.08e-06	0.196	CAAAAACTGACAAAAACT
MLOC_60958	C2H2	HvFRF7	1138	1154	+	13.2727	7.18e-06	0.0999	AAGAAAACAACAAGAGA
MLOC_60958	C2H2	HvFRF19	1156	1172	+	13.2727	7.18e-06	0.0999	AAGAAAACAACAAGAGA
MLOC_3855	C2H2	HvFRF12	1875	1893	-	13.4286	7.48e-06	0.0134	CCGCATTCTCAACATCCAC
MLOC_14363	C2H2	HvFRF5	1140	1156	+	13.303	8.45e-06	0.187	CAAAAACTGACAAAAAC
MLOC_3855	C2H2	HvFRF10	1676	1694	-	13.1905	8.61e-06	0.0145	CATCATCCTCATCATTGTC
MLOC_3855	C2H2	HvFRF10	1730	1748	-	13.1905	8.61e-06	0.0145	CATCATCCTCATCATTGTC
MLOC_3855	C2H2	HvFRF17	1887	1905	-	13.1905	8.61e-06	0.0145	CATCATCCTCATCATTGTC
MLOC_3855	C2H2	HvFRF18	1145	1163	-	13.1429	8.86e-06	0.0146	CCTCCGCGTCCCCATCCTC
MLOC_60958	C2H2	HvFRF11	1120	1136	+	12.6515	9.6e-06	0.107	AAGAAAACAACAACAGA
MLOC_1876	C2H2	HvFRF13	1295	1306	-	12	9.8e-06	0.213	TTTCCCCTTTTG
MLOC_3855	C2H2	HvFRF19	644	662	+	12.8889	1.03e-05	0.0164	CCCTCCCCTCCCCCTCACC
MLOC_60958	C2H2	HvFRF2	980	996	+	12.5	1.03e-05	0.107	AAGAAGAAAACAAACAA
MLOC_3855	C2H2	HvFRF12	1869	1887	-	12.8175	1.07e-05	0.0164	TCTCAACATCCACATCTTC
MLOC_3855	C2H2	HvFRF7	686	704	+	12.7857	1.09e-05	0.0164	ATCTCTTCTCCTCTTCTTC
MLOC_3855	C2H2	HvFRF10	1700	1718	-	12.7857	1.09e-05	0.0164	CATTATCACCATCCTCATC
MLOC_3855	C2H2	HvFRF17	1929	1947	-	12.7857	1.09e-05	0.0164	CATTATCACCATCCTCATC
MLOC_3855	C2H2	HvFRF11	597	615	+	12.6429	1.19e-05	0.0172	TCCCCTCCCCCTCTCCCCC
MLOC_3855	C2H2	HvFRF7	609	627	+	12.6429	1.19e-05	0.0172	TCCCCTCCCCCTCTCCCCC
MLOC_60958	C2H2	HvFRF19	93	109	+	12.1364	1.21e-05	0.112	AAAAAACGAACAAAAAA
MLOC_10987	C2H2	HvFRF16	836	850	+	13.1212	1.24e-05	0.991	GCCTGCCCCTGATGA
MLOC_65033	C2H2	HvFRF17	1820	1830	+	12.2985	1.27e-05	0.724	CACTTACACTT
MLOC_54674	C2H2	HvFRF17	1820	1830	+	12.2985	1.27e-05	0.719	CACTTACACTT
MLOC_60958	C2H2	HvFRF7	337	353	-	11.8333	1.38e-05	0.115	AAAAAAGAAACAAAAAA
MLOC_3855	C2H2	HvFRF14	485	503	+	12.2937	1.45e-05	0.019	CCCCCCTGTCTTCTTCCTC
MLOC_3855	C2H2	HvFRF22	543	561	+	12.2937	1.45e-05	0.019	CCCCCCTGTCTTCTTCCTC
MLOC_3855	C2H2	HvFRF9	544	562	+	12.2937	1.45e-05	0.019	CCCCCCTGTCTTCTTCCTC
MLOC_3855	C2H2	HvFRF2	551	569	+	12.2937	1.45e-05	0.019	CCCCCCTGTCTTCTTCCTC
MLOC_3855	C2H2	HvFRF1	1518	1536	+	12.2937	1.45e-05	0.019	CCCCCCTGTCTTCTTCCTC
MLOC_3855	C2H2	HvFRF16	1567	1585	-	12.2778	1.46e-05	0.019	CCCTCCTCTCCTCCTCCGA
MLOC_23443	C2H2	HvFRF13	107	124	+	13.0423	1.49e-05	0.55	TAAATGACACCTAAACTG
MLOC_3855	C2H2	HvFRF10	1733	1751	-	12.2381	1.5e-05	0.019	TATCATCATCCTCATCATT
MLOC_3855	C2H2	HvFRF17	1944	1962	-	12.2381	1.5e-05	0.019	TATCATCATCCTCATCATT
MLOC_60958	C2H2	HvFRF4	1099	1115	+	11.5909	1.53e-05	0.116	TAATAAATGACAACAAA
MLOC_1876	C2H2	HvFRF14	934	945	-	11.6863	1.55e-05	0.213	TTTTCTTTTTTG
MLOC_1876	C2H2	HvFRF22	975	986	-	11.6863	1.55e-05	0.213	TTTTCTTTTTTG
MLOC_1876	C2H2	HvFRF9	995	1006	-	11.6863	1.55e-05	0.213	TTTTCTTTTTTG
MLOC_1876	C2H2	HvFRF1	1961	1972	-	11.6863	1.55e-05	0.213	TTTTCTTTTTTG
MLOC_3855	C2H2	HvFRF10	1706	1724	-	12.1746	1.55e-05	0.0191	CCTCATCATTATCACCATC
MLOC_3855	C2H2	HvFRF17	1935	1953	-	12.1746	1.55e-05	0.0191	CCTCATCATTATCACCATC
MLOC_3855	C2H2	HvFRF11	600	618	+	12.0635	1.65e-05	0.0193	CCTCCCCCTCTCCCCCACC
MLOC_3855	C2H2	HvFRF16	1653	1671	-	12.0397	1.68e-05	0.0193	CCCCTCCCATCTTCTCCAC
MLOC_3855	C2H2	HvFRF10	1703	1721	-	12.0317	1.68e-05	0.0193	CATCATTATCACCATCCTC
MLOC_3855	C2H2	HvFRF17	1932	1950	-	12.0317	1.68e-05	0.0193	CATCATTATCACCATCCTC
MLOC_79967	C2H2	HvFRF5	910	917	+	11.0606	1.7e-05	1	TGTAGTAG
MLOC_3855	C2H2	HvFRF12	1872	1890	-	12.0079	1.71e-05	0.0193	CATTCTCAACATCCACATC
MLOC_65033	C2H2	HvFRF1	806	816	+	12.0597	1.72e-05	0.724	CAGTATCACTT
MLOC_54674	C2H2	HvFRF1	806	816	+	12.0597	1.72e-05	0.719	CAGTATCACTT
MLOC_1876	C2H2	HvFRF21	536	547	-	11.598	1.75e-05	0.213	TTTTTTTTTGCG
MLOC_3855	C2H2	HvFRF21	234	252	+	11.9603	1.75e-05	0.0193	TCTTCTCCACCGCATCATC
MLOC_3855	C2H2	HvFRF10	1685	1703	-	11.9603	1.75e-05	0.0193	CATCATTGTCATCATCCTC
MLOC_3855	C2H2	HvFRF10	1721	1739	-	11.9603	1.75e-05	0.0193	CATCATTGTCATCATCCTC
MLOC_78652	C2H2	HvFRF5	1140	1159	+	11.1061	1.92e-05	0.329	CAAAAACTGACAAAAACTGC
MLOC_14363	C2H2	HvFRF4	1099	1115	+	11.3939	1.96e-05	0.187	TAATAAATGACAACAAA
MLOC_78652	C2H2	HvFRF18	1409	1428	-	11.0152	2e-05	0.329	ACAAAAAAGGCAAAAAAACT
MLOC_14363	C2H2	HvFRF18	218	234	-	11.3333	2.01e-05	0.187	TCCAAAACAACAAATAA
MLOC_57518	C2H2	HvFRF21	1626	1643	+	11.2576	2.05e-05	0.217	AACACACAGACAAAAAAA
MLOC_78652	C2H2	HvFRF13	123	142	+	10.9091	2.08e-05	0.329	TGAAAAAAGGCAAAACTTAA
MLOC_3855	C2H2	HvFRF18	1142	1160	-	11.6429	2.1e-05	0.0217	CCGCGTCCCCATCCTCTGC
MLOC_3855	C2H2	HvFRF16	1391	1409	-	11.627	2.12e-05	0.0217	CCTGCCCCTCCTCTCCCCC
MLOC_3855	C2H2	HvFRF17	192	210	+	11.5952	2.15e-05	0.0217	CCTCTCCCTCCGCTTCGAC
MLOC_3855	C2H2	HvFRF11	917	935	+	11.5952	2.15e-05	0.0217	TCTCTTGTTTCTCCCCCTC
MLOC_3855	C2H2	HvFRF7	934	952	+	11.5952	2.15e-05	0.0217	TCTCTTGTTTCTCCCCCTC
MLOC_3855	C2H2	HvFRF19	955	973	+	11.5952	2.15e-05	0.0217	TCTCTTGTTTCTCCCCCTC
MLOC_76196	C2H2	HvFRF8	48	60	-	11.0707	2.17e-05	0.835	ACCGAGTGTAATA
MLOC_3855	C2H2	HvFRF2	430	448	+	11.5714	2.18e-05	0.0217	CATCCTTTCCCTCTTTTTC
MLOC_3855	C2H2	HvFRF1	1400	1418	+	11.5714	2.18e-05	0.0217	CACCCTTTCCCTCCTTTTC
MLOC_3855	C2H2	HvFRF11	606	624	+	11.5397	2.22e-05	0.0218	CCTCTCCCCCACCCACCAC
MLOC_57518	C2H2	HvFRF7	1138	1155	+	10.9697	2.31e-05	0.217	AAGAAAACAACAAGAGAA
MLOC_3855	C2H2	HvFRF16	1678	1696	-	11.4603	2.32e-05	0.0222	CCCTCCTCTCCTCCTCCGG
MLOC_29808	C2H2	HvFRF17	897	907	-	11.5303	2.33e-05	1	GAGTGAAATAA
MLOC_3855	C2H2	HvFRF10	1679	1697	-	11.3889	2.41e-05	0.0222	TGTCATCATCCTCATCATT
MLOC_3855	C2H2	HvFRF10	1715	1733	-	11.3889	2.41e-05	0.0222	TGTCATCATCCTCATCATT
MLOC_3855	C2H2	HvFRF10	1751	1769	-	11.3889	2.41e-05	0.0222	TGTCATCATCCTCATCATT
MLOC_3855	C2H2	HvFRF17	1890	1908	-	11.3889	2.41e-05	0.0222	TGTCATCATCCTCATCATT
MLOC_3855	C2H2	HvFRF17	1962	1980	-	11.3889	2.41e-05	0.0222	TGTCATCATCCTCATCATT
MLOC_60958	C2H2	HvFRF20	1897	1913	+	10.4697	2.44e-05	0.135	GGAAAAAAAACAAAAGT
MLOC_14363	C2H2	HvFRF21	1679	1695	+	10.8485	2.44e-05	0.187	GGAAATACAACAAAAAT
MLOC_3855	C2H2	HvFRF10	1673	1691	-	11.2778	2.57e-05	0.0226	CATCCTCATCATTGTCATC
MLOC_3855	C2H2	HvFRF10	1691	1709	-	11.2778	2.57e-05	0.0226	CATCCTCATCATTGTCATC
MLOC_3855	C2H2	HvFRF10	1727	1745	-	11.2778	2.57e-05	0.0226	CATCCTCATCATTGTCATC
MLOC_3855	C2H2	HvFRF17	1884	1902	-	11.2778	2.57e-05	0.0226	CATCCTCATCATTGTCATC
MLOC_57518	C2H2	HvFRF4	1099	1116	+	10.7121	2.58e-05	0.217	TAATAAATGACAACAAAC
MLOC_3855	C2H2	HvFRF17	1893	1911	-	11.254	2.6e-05	0.0226	TATTGTCATCATCCTCATC
MLOC_60958	C2H2	HvFRF14	936	952	+	10.2424	2.68e-05	0.135	AAAAAGAAAACAAACAA
MLOC_60958	C2H2	HvFRF22	977	993	+	10.2424	2.68e-05	0.135	AAAAAGAAAACAAACAA
MLOC_60958	C2H2	HvFRF9	997	1013	+	10.2424	2.68e-05	0.135	AAAAAGAAAACAAACAA
MLOC_60958	C2H2	HvFRF1	1963	1979	+	10.2424	2.68e-05	0.135	AAAAAGAAAACAAACAA
MLOC_3855	C2H2	HvFRF16	1739	1757	-	11.1746	2.72e-05	0.0231	CGACCTGCACCTCCTCCCC
MLOC_14363	C2H2	HvFRF7	1138	1154	+	10.5606	2.73e-05	0.187	AAGAAAACAACAAGAGA
MLOC_14363	C2H2	HvFRF19	1156	1172	+	10.5606	2.73e-05	0.187	AAGAAAACAACAAGAGA
MLOC_60958	C2H2	HvFRF18	218	234	-	10.1818	2.74e-05	0.135	TCCAAAACAACAAATAA
MLOC_1876	C2H2	HvFRF9	1813	1824	-	11.2549	2.76e-05	0.217	TTTTTTTTCTCG
MLOC_3855	C2H2	HvFRF2	548	566	+	11.1429	2.76e-05	0.0231	CTTCCCCCCTGTCTTCTTC
MLOC_3855	C2H2	HvFRF18	1148	1166	-	11.1429	2.76e-05	0.0231	CACCCTCCGCGTCCCCATC
MLOC_3855	C2H2	HvFRF1	1515	1533	+	11.1429	2.76e-05	0.0231	CTTCCCCCCTGTCTTCTTC
MLOC_3855	C2H2	HvFRF2	427	445	+	11.1111	2.81e-05	0.0232	CCCCATCCTTTCCCTCTTT
MLOC_14363	C2H2	HvFRF7	337	353	-	10.4848	2.82e-05	0.187	AAAAAAGAAACAAAAAA
MLOC_3855	C2H2	HvFRF21	240	258	+	11.0952	2.84e-05	0.0232	CCACCGCATCATCATCAAC
MLOC_76196	C2H2	HvFRF8	1428	1440	+	10.8687	2.86e-05	0.835	ATTAAGTGTGCTG
MLOC_3855	C2H2	HvFRF17	1899	1917	-	11.0397	2.92e-05	0.0233	CCTCATTATTGTCATCATC
MLOC_1876	C2H2	HvFRF5	707	718	-	11.2157	2.93e-05	0.217	TTGCCTTTTTTG
MLOC_1876	C2H2	HvFRF18	1416	1427	+	11.2157	2.93e-05	0.217	TTGCCTTTTTTG
MLOC_3855	C2H2	HvFRF8	1280	1298	-	10.9286	3.11e-05	0.0233	CCTCAACTTTCTCCTTTCC
MLOC_3855	C2H2	HvFRF16	1736	1754	-	10.9286	3.11e-05	0.0233	CCTGCACCTCCTCCCCTCC
MLOC_1876	C2H2	HvFRF17	1666	1677	+	11.1667	3.13e-05	0.217	TTTTTCCTTTTG
MLOC_14363	C2H2	HvFRF2	980	996	+	10.1818	3.16e-05	0.187	AAGAAGAAAACAAACAA
MLOC_1876	C2H2	HvFRF5	997	1008	+	11.1471	3.17e-05	0.217	TTGTTCTTCCCG
MLOC_3855	C2H2	HvFRF10	1694	1712	-	10.873	3.2e-05	0.0233	CACCATCCTCATCATTGTC
MLOC_3855	C2H2	HvFRF3	390	408	+	10.8651	3.22e-05	0.0233	CCCCCCCCCCCCCCCCCCC
MLOC_3855	C2H2	HvFRF3	391	409	+	10.8651	3.22e-05	0.0233	CCCCCCCCCCCCCCCCCCC
MLOC_3855	C2H2	HvFRF3	392	410	+	10.8651	3.22e-05	0.0233	CCCCCCCCCCCCCCCCCCC
MLOC_3855	C2H2	HvFRF3	393	411	+	10.8651	3.22e-05	0.0233	CCCCCCCCCCCCCCCCCCC
MLOC_3855	C2H2	HvFRF3	394	412	+	10.8651	3.22e-05	0.0233	CCCCCCCCCCCCCCCCCCC
MLOC_3855	C2H2	HvFRF3	395	413	+	10.8651	3.22e-05	0.0233	CCCCCCCCCCCCCCCCCCC
MLOC_3855	C2H2	HvFRF3	396	414	+	10.8651	3.22e-05	0.0233	CCCCCCCCCCCCCCCCCCC
MLOC_3855	C2H2	HvFRF3	397	415	+	10.8651	3.22e-05	0.0233	CCCCCCCCCCCCCCCCCCC
MLOC_3855	C2H2	HvFRF3	398	416	+	10.8651	3.22e-05	0.0233	CCCCCCCCCCCCCCCCCCC
MLOC_78652	C2H2	HvFRF4	1099	1118	+	9.75758	3.25e-05	0.329	TAATAAATGACAACAAACAC
MLOC_3855	C2H2	HvFRF18	1759	1777	-	10.8333	3.27e-05	0.0234	TCCCCCCCACCTCTGCCCC
MLOC_3855	C2H2	HvFRF21	231	249	+	10.8254	3.29e-05	0.0234	TCATCTTCTCCACCGCATC
MLOC_1876	C2H2	HvFRF17	690	701	-	11.1176	3.31e-05	0.217	TTTCCTCTCCCG
MLOC_3855	C2H2	HvFRF6	1620	1638	+	10.7778	3.37e-05	0.0236	CTTTTCACGCCTCCTCTTC
MLOC_3855	C2H2	HvFRF11	599	617	+	10.7619	3.4e-05	0.0236	CCCTCCCCCTCTCCCCCAC
MLOC_3855	C2H2	HvFRF7	614	632	+	10.7619	3.4e-05	0.0236	TCCCCCTCTCCCCCCCCAC
MLOC_14363	C2H2	HvFRF20	1897	1913	+	9.87879	3.55e-05	0.187	GGAAAAAAAACAAAAGT
MLOC_65033	C2H2	HvFRF17	938	948	-	11.6119	3.55e-05	0.999	CACTTTCAGTT
MLOC_54674	C2H2	HvFRF17	938	948	-	11.6119	3.55e-05	0.992	CACTTTCAGTT
MLOC_3855	C2H2	HvFRF4	1805	1823	+	10.6746	3.56e-05	0.0245	CCCTTTTACCTTCCTTCTC
MLOC_3855	C2H2	HvFRF20	1833	1851	+	10.6587	3.59e-05	0.0245	CTCCCTCTGCATCTTCACC
MLOC_14363	C2H2	HvFRF4	943	959	-	9.81818	3.63e-05	0.187	TACAAACAAACAAAATA
MLOC_3855	C2H2	HvFRF7	618	636	+	10.6349	3.64e-05	0.0246	CCTCTCCCCCCCCACCCAC
MLOC_3855	C2H2	HvFRF18	1139	1157	-	10.5873	3.74e-05	0.0246	CGTCCCCATCCTCTGCCAT
MLOC_57518	C2H2	HvFRF19	1156	1173	+	9.78788	3.75e-05	0.217	AAGAAAACAACAAGAGAC
MLOC_3855	C2H2	HvFRF13	1174	1192	-	10.5714	3.77e-05	0.0246	CATCCTCATAATCAGCATC
MLOC_60958	C2H2	HvFRF2	594	610	+	9.34848	3.79e-05	0.145	AACATACCAACAAGAAA
MLOC_3855	C2H2	HvFRF19	45	63	+	10.5476	3.82e-05	0.0246	CCTCCCAACCCTCTCCCTC
MLOC_60958	C2H2	HvFRF6	791	807	-	9.30303	3.85e-05	0.145	AACTAAAAAACAAACGG
MLOC_14363	C2H2	HvFRF19	93	109	+	9.65152	3.86e-05	0.187	AAAAAACGAACAAAAAA
MLOC_3855	C2H2	HvFRF12	242	260	+	10.5159	3.88e-05	0.0246	TCTCCCTACCTTACTCCTC
MLOC_60958	C2H2	HvFRF21	224	240	-	9.27273	3.9e-05	0.145	GAGAAGATGACAAAGGG
MLOC_3855	C2H2	HvFRF10	1709	1727	-	10.5	3.91e-05	0.0246	CATCCTCATCATTATCACC
MLOC_3855	C2H2	HvFRF17	1938	1956	-	10.5	3.91e-05	0.0246	CATCCTCATCATTATCACC
MLOC_3855	C2H2	HvFRF14	798	816	+	10.4762	3.96e-05	0.0246	CCACCTCTCTTTCTCCCTC
MLOC_3855	C2H2	HvFRF22	839	857	+	10.4762	3.96e-05	0.0246	CCACCTCTCTTTCTCCCTC
MLOC_3855	C2H2	HvFRF21	823	841	-	10.4762	3.96e-05	0.0246	CTTCACCAACATCTTCGTC
MLOC_3855	C2H2	HvFRF9	857	875	+	10.4762	3.96e-05	0.0246	CCACCTCTCTTTCTCCCTC
MLOC_3855	C2H2	HvFRF1	1827	1845	+	10.4762	3.96e-05	0.0246	CCACCTCTCTTTCTCCCTC
MLOC_3855	C2H2	HvFRF11	603	621	+	10.4365	4.05e-05	0.025	CCCCCTCTCCCCCACCCAC
MLOC_57518	C2H2	HvFRF11	1120	1137	+	9.57576	4.07e-05	0.217	AAGAAAACAACAACAGAA
MLOC_14363	C2H2	HvFRF11	1120	1136	+	9.48485	4.1e-05	0.187	AAGAAAACAACAACAGA
MLOC_60958	C2H2	HvFRF10	659	675	-	9.12121	4.13e-05	0.145	AAATTAACGTCAAAAAT
MLOC_60958	C2H2	HvFRF14	684	700	+	9.09091	4.17e-05	0.145	CAGAAAAGGACTAAAAA
MLOC_60958	C2H2	HvFRF2	747	763	+	9.09091	4.17e-05	0.145	CAGAAAAGGACTAAAAA
MLOC_60958	C2H2	HvFRF1	1713	1729	+	9.09091	4.17e-05	0.145	CAGAAAAGGACTAAAAA
MLOC_14363	C2H2	HvFRF14	936	952	+	9.34848	4.31e-05	0.187	AAAAAGAAAACAAACAA
MLOC_14363	C2H2	HvFRF22	977	993	+	9.34848	4.31e-05	0.187	AAAAAGAAAACAAACAA
MLOC_14363	C2H2	HvFRF9	997	1013	+	9.34848	4.31e-05	0.187	AAAAAGAAAACAAACAA
MLOC_14363	C2H2	HvFRF1	1963	1979	+	9.34848	4.31e-05	0.187	AAAAAGAAAACAAACAA
MLOC_57518	C2H2	HvFRF10	658	675	-	9.39394	4.37e-05	0.217	AAATTAACGTCAAAAATC
MLOC_60958	C2H2	HvFRF21	82	98	+	8.89394	4.5e-05	0.146	GAGTACAAGACAAGTTA
MLOC_3855	C2H2	HvFRF12	245	263	+	10.2381	4.5e-05	0.0275	CCCTACCTTACTCCTCTAC
MLOC_78652	C2H2	HvFRF13	252	271	+	8.86364	4.51e-05	0.329	TGAGTAGCGACAAATATACT
MLOC_78652	C2H2	HvFRF13	445	464	+	8.86364	4.51e-05	0.329	TGAGTAGCGACAAATATACT
MLOC_1876	C2H2	HvFRF15	1968	1979	+	10.8333	4.6e-05	0.257	TCTTCTCTTTCG
MLOC_60958	C2H2	HvFRF19	1253	1269	-	8.80303	4.65e-05	0.146	GACAAAACAACAATTAA
MLOC_57518	C2H2	HvFRF13	252	269	+	9.22727	4.66e-05	0.217	TGAGTAGCGACAAATATA
MLOC_57518	C2H2	HvFRF13	445	462	+	9.22727	4.66e-05	0.217	TGAGTAGCGACAAATATA
MLOC_23443	C2H2	HvFRF16	1582	1599	-	11.0986	4.68e-05	0.55	CAGTGACGACCTGCCCCT
MLOC_23443	C2H2	HvFRF16	1609	1626	-	11.0986	4.68e-05	0.55	CAGTGACGACCTGCCCCT
MLOC_78652	C2H2	HvFRF1	513	532	+	8.74242	4.7e-05	0.329	AAAGAAGAGACAGAAAACAA
MLOC_23443	C2H2	HvFRF11	871	888	+	11.0845	4.72e-05	0.55	CAGAAAAAAACTACCAAG
MLOC_60958	C2H2	HvFRF12	1317	1333	-	8.75758	4.73e-05	0.146	CGTAAGAAAACAAAGAT
MLOC_65033	C2H2	HvFRF4	17	27	+	11.3134	4.75e-05	1	CACACACACTA
MLOC_54674	C2H2	HvFRF4	17	27	+	11.3134	4.75e-05	0.995	CACACACACTA
MLOC_3855	C2H2	HvFRF8	764	782	+	10.127	4.77e-05	0.0286	CCCTCCCCATCTTCTTCTC
MLOC_3855	C2H2	HvFRF8	768	786	+	10.119	4.79e-05	0.0286	CCCCATCTTCTTCTCCAGC
MLOC_3855	C2H2	HvFRF10	1112	1130	+	10.119	4.79e-05	0.0286	CCTCTCCCTCCGCTTCGGC
MLOC_1876	C2H2	HvFRF16	1025	1036	-	10.7941	4.82e-05	0.257	TTTTCTTTTTCT
MLOC_3855	C2H2	HvFRF16	1570	1588	-	10.0952	4.85e-05	0.0286	TGCCCCTCCTCTCCTCCTC
MLOC_3855	C2H2	HvFRF19	1011	1029	+	10.0873	4.87e-05	0.0286	TCCACCTCTCTTTCTCCTC
MLOC_14363	C2H2	HvFRF6	717	733	-	9	4.88e-05	0.187	AAGCTAACAACAAAAAT
MLOC_57518	C2H2	HvFRF13	604	621	+	9.07576	4.94e-05	0.217	AAAATGATGACAAACGAA
MLOC_23443	C2H2	HvFRF16	1158	1175	-	11	4.94e-05	0.55	CAGATGCCCCCTGGAACA
MLOC_3855	C2H2	HvFRF3	401	419	+	10.0556	4.95e-05	0.0286	CCCCCCCCCCCCCCCCAAC
MLOC_3855	C2H2	HvFRF20	1514	1532	+	10.0159	5.06e-05	0.0286	CGTTTTCTTCCTCCCTCCC
MLOC_3855	C2H2	HvFRF20	1830	1848	+	10.0079	5.08e-05	0.0286	TTTCTCCCTCTGCATCTTC
MLOC_23443	C2H2	HvFRF12	311	328	-	10.9437	5.1e-05	0.55	CAAGTACACCCTACACAT
MLOC_79967	C2H2	HvFRF3	57	64	+	10.8333	5.1e-05	1	TGAAGTAG
MLOC_3855	C2H2	HvFRF19	653	671	+	9.97619	5.16e-05	0.0286	CCCCCTCACCCACCACCAA
MLOC_57518	C2H2	HvFRF7	336	353	-	8.95455	5.17e-05	0.217	AAAAAAGAAACAAAAAAT
MLOC_23443	C2H2	HvFRF16	1746	1763	-	10.9155	5.18e-05	0.55	CAGGGACGACCTGCACCT
MLOC_60958	C2H2	HvFRF20	928	944	+	8.5	5.2e-05	0.152	AGGGAGATGACAAATAG
MLOC_57518	C2H2	HvFRF18	217	234	-	8.93939	5.2e-05	0.217	TCCAAAACAACAAATAAG
MLOC_3855	C2H2	HvFRF8	105	123	+	9.96032	5.21e-05	0.0286	CTCCATCATCGTCATCATT
MLOC_14363	C2H2	HvFRF13	604	620	+	8.78788	5.26e-05	0.187	AAAATGATGACAAACGA
MLOC_60958	C2H2	HvFRF21	1679	1695	+	8.45455	5.28e-05	0.152	GGAAATACAACAAAAAT
MLOC_14363	C2H2	HvFRF18	1542	1558	+	8.77273	5.28e-05	0.187	GCTATTCAGACAAAAAA
MLOC_1876	C2H2	HvFRF13	892	903	-	10.7157	5.31e-05	0.257	TTTTCTCTTCTG
MLOC_3855	C2H2	HvFRF13	1882	1900	-	9.9127	5.34e-05	0.0286	TGTCATTTTCTTCATTCTC
MLOC_3855	C2H2	HvFRF21	118	136	+	9.90476	5.36e-05	0.0286	CTATCTCTATCTCCTTATC
MLOC_3855	C2H2	HvFRF3	404	422	+	9.88889	5.41e-05	0.0286	CCCCCCCCCCCCCAACTTC
MLOC_3855	C2H2	HvFRF14	482	500	+	9.88889	5.41e-05	0.0286	CCCCCCCCCTGTCTTCTTC
MLOC_3855	C2H2	HvFRF22	540	558	+	9.88889	5.41e-05	0.0286	CCCCCCCCCTGTCTTCTTC
MLOC_1876	C2H2	HvFRF14	754	765	-	10.6961	5.43e-05	0.257	TTTGCCTTTTTG
MLOC_1876	C2H2	HvFRF9	813	824	-	10.6961	5.43e-05	0.257	TTTGCCTTTTTG
MLOC_3855	C2H2	HvFRF14	488	506	+	9.87302	5.45e-05	0.0286	CCCTGTCTTCTTCCTCCCT
MLOC_3855	C2H2	HvFRF22	546	564	+	9.87302	5.45e-05	0.0286	CCCTGTCTTCTTCCTCCCT
MLOC_3855	C2H2	HvFRF9	547	565	+	9.87302	5.45e-05	0.0286	CCCTGTCTTCTTCCTCCCT
MLOC_3855	C2H2	HvFRF2	554	572	+	9.87302	5.45e-05	0.0286	CCCTGTCTTCTTCCTCCCT
MLOC_3855	C2H2	HvFRF1	1521	1539	+	9.87302	5.45e-05	0.0286	CCCTGTCTTCTTCCTCCCT
MLOC_60958	C2H2	HvFRF1	533	549	+	8.33333	5.52e-05	0.154	GAAAAAAAAACAGAAAA
MLOC_3855	C2H2	HvFRF17	47	65	+	9.84921	5.52e-05	0.0286	CCACCCCCCCCCCCCCCCC
MLOC_3855	C2H2	HvFRF17	1917	1935	-	9.83333	5.56e-05	0.0286	CCTCATCATTGTTATCATC
MLOC_3855	C2H2	HvFRF1	1488	1506	+	9.8254	5.59e-05	0.0286	CCCTACCCCCATCCCCCAC
MLOC_3855	C2H2	HvFRF17	1539	1557	-	9.81746	5.61e-05	0.0286	CCTCAACCGCCACCACTGC
MLOC_3855	C2H2	HvFRF7	621	639	+	9.80952	5.63e-05	0.0286	CTCCCCCCCCACCCACCAC
MLOC_78652	C2H2	HvFRF14	684	703	+	8.21212	5.66e-05	0.329	CAGAAAAGGACTAAAAAAAC
MLOC_78652	C2H2	HvFRF2	747	766	+	8.21212	5.66e-05	0.329	CAGAAAAGGACTAAAAAAAC
MLOC_78652	C2H2	HvFRF1	1713	1732	+	8.21212	5.66e-05	0.329	CAGAAAAGGACTAAAAAAAC
MLOC_57518	C2H2	HvFRF20	928	945	+	8.71212	5.66e-05	0.217	AGGGAGATGACAAATAGG
MLOC_3855	C2H2	HvFRF8	922	940	+	9.79365	5.68e-05	0.0286	CCTCCCCCCCTTATGCATC
MLOC_57518	C2H2	HvFRF14	684	701	+	8.68182	5.73e-05	0.217	CAGAAAAGGACTAAAAAA
MLOC_57518	C2H2	HvFRF2	747	764	+	8.68182	5.73e-05	0.217	CAGAAAAGGACTAAAAAA
MLOC_57518	C2H2	HvFRF1	1713	1730	+	8.68182	5.73e-05	0.217	CAGAAAAGGACTAAAAAA
MLOC_57518	C2H2	HvFRF4	942	959	-	8.68182	5.73e-05	0.217	TACAAACAAACAAAATAC
MLOC_29808	C2H2	HvFRF5	818	828	-	10.9848	5.74e-05	1	GAGTGGAGGAG
MLOC_78652	C2H2	HvFRF6	481	500	+	8.16667	5.75e-05	0.329	TTGTAGGTGACAAAAAAATT
MLOC_3855	C2H2	HvFRF2	424	442	+	9.7619	5.77e-05	0.0286	CAGCCCCATCCTTTCCCTC
MLOC_14363	C2H2	HvFRF6	481	497	+	8.4697	5.87e-05	0.187	TTGTAGGTGACAAAAAA
MLOC_3855	C2H2	HvFRF7	701	719	+	9.72222	5.9e-05	0.0286	CTTCTTCCTCCCTCCCCAA
MLOC_3855	C2H2	HvFRF19	727	745	+	9.72222	5.9e-05	0.0286	CTTCTTCCTCCCTCCCCAA
MLOC_3855	C2H2	HvFRF19	1968	1986	-	9.72222	5.9e-05	0.0286	CTTCATCCTCATTTGCATT
MLOC_3855	C2H2	HvFRF14	1980	1998	-	9.72222	5.9e-05	0.0286	CTTCATCCTCATTTGCATT
MLOC_3855	C2H2	HvFRF11	1980	1998	-	9.72222	5.9e-05	0.0286	CTTCATCCTCATTTGCATT
MLOC_3855	C2H2	HvFRF22	1980	1998	-	9.72222	5.9e-05	0.0286	CTTCATCCTCATTTGCATT
MLOC_3855	C2H2	HvFRF2	1980	1998	-	9.72222	5.9e-05	0.0286	CTTCATCCTCATTTGCATT
MLOC_3855	C2H2	HvFRF9	1980	1998	-	9.72222	5.9e-05	0.0286	CTTCATCCTCATTTGCATT
MLOC_14363	C2H2	HvFRF20	928	944	+	8.45455	5.9e-05	0.187	AGGGAGATGACAAATAG
MLOC_57518	C2H2	HvFRF21	82	99	+	8.59091	5.92e-05	0.217	GAGTACAAGACAAGTTAC
MLOC_3855	C2H2	HvFRF10	1047	1065	+	9.69841	5.97e-05	0.0288	CCCCCACCGCCTCGTCTCC
MLOC_3855	C2H2	HvFRF19	714	732	+	9.68254	6.02e-05	0.0289	TATCTTCCCCCTTCTTCTT
MLOC_60958	C2H2	HvFRF17	360	376	+	8.09091	6.02e-05	0.155	TAGATCAAGACAACACC
MLOC_60958	C2H2	HvFRF10	1281	1297	+	8.09091	6.02e-05	0.155	TAGATCAAGACAACACC
MLOC_10987	C2H2	HvFRF15	1718	1732	-	11.0909	6.07e-05	0.991	GCCACCACCGGATCA
MLOC_14363	C2H2	HvFRF16	116	132	+	8.36364	6.09e-05	0.187	AAAAACTAGACAAACAA
MLOC_29808	C2H2	HvFRF13	42	52	-	10.9394	6.16e-05	1	TAGTGTTGTTG
MLOC_60958	C2H2	HvFRF17	1897	1913	+	8	6.22e-05	0.155	AGGATGATGACAATAAT
MLOC_78652	C2H2	HvFRF13	604	623	+	7.92424	6.24e-05	0.329	AAAATGATGACAAACGAAAC
MLOC_3855	C2H2	HvFRF19	1300	1318	+	9.60317	6.27e-05	0.0299	TTTCCACCTAAACCACCAC
MLOC_14363	C2H2	HvFRF21	224	240	-	8.25758	6.31e-05	0.187	GAGAAGATGACAAAGGG
MLOC_3855	C2H2	HvFRF10	1697	1715	-	9.57937	6.35e-05	0.03	TATCACCATCCTCATCATT
MLOC_3855	C2H2	HvFRF17	1926	1944	-	9.57937	6.35e-05	0.03	TATCACCATCCTCATCATT
MLOC_60958	C2H2	HvFRF13	604	620	+	7.92424	6.39e-05	0.155	AAAATGATGACAAACGA
MLOC_3855	C2H2	HvFRF19	717	735	+	9.54762	6.45e-05	0.0303	CTTCCCCCTTCTTCTTCCT
MLOC_10987	C2H2	HvFRF10	1772	1786	-	11	6.48e-05	0.991	TCCTTCATTAGATGC
MLOC_10987	C2H2	HvFRF17	1983	1997	-	11	6.48e-05	0.991	TCCTTCATTAGATGC
MLOC_3855	C2H2	HvFRF8	725	743	+	9.52381	6.53e-05	0.0305	GCGCATCTTCTTCTCCCTC
MLOC_14363	C2H2	HvFRF13	252	268	+	8.15152	6.54e-05	0.187	TGAGTAGCGACAAATAT
MLOC_14363	C2H2	HvFRF13	445	461	+	8.15152	6.54e-05	0.187	TGAGTAGCGACAAATAT
MLOC_57518	C2H2	HvFRF19	93	110	+	8.30303	6.59e-05	0.217	AAAAAACGAACAAAAAAT
MLOC_78652	C2H2	HvFRF20	928	947	+	7.75758	6.6e-05	0.329	AGGGAGATGACAAATAGGCA
MLOC_57518	C2H2	HvFRF2	980	997	+	8.28788	6.62e-05	0.217	AAGAAGAAAACAAACAAG
MLOC_14363	C2H2	HvFRF1	513	529	+	8.10606	6.64e-05	0.187	AAAGAAGAGACAGAAAA
MLOC_57518	C2H2	HvFRF21	223	240	-	8.25758	6.7e-05	0.217	GAGAAGATGACAAAGGGC
MLOC_78652	C2H2	HvFRF7	1150	1169	+	7.71212	6.7e-05	0.329	AGAGAAAGGACACATATATA
MLOC_60958	C2H2	HvFRF13	1472	1488	+	7.75758	6.78e-05	0.155	AACAACAAGACAATGTC
MLOC_3855	C2H2	HvFRF18	1073	1091	-	9.45238	6.78e-05	0.0313	CTACCTCACTATCCCCCAC
MLOC_3855	C2H2	HvFRF20	1824	1842	+	9.45238	6.78e-05	0.0313	CCTCTCTTTCTCCCTCTGC
MLOC_79967	C2H2	HvFRF19	1573	1580	+	10.8182	6.8e-05	1	AGAAGTAG
MLOC_3855	C2H2	HvFRF8	1872	1890	-	9.43651	6.83e-05	0.0313	CATCATCATTTTCATCACC
MLOC_78652	C2H2	HvFRF8	524	543	-	7.63636	6.87e-05	0.329	TATGTGGGGACAAAAATTTA
MLOC_60958	C2H2	HvFRF19	778	794	+	7.71212	6.89e-05	0.155	AGGAAAATAACAACACA
MLOC_60958	C2H2	HvFRF18	1369	1385	-	7.71212	6.89e-05	0.155	CAGTAAAAAACAATGAA
MLOC_10987	C2H2	HvFRF20	1843	1857	+	10.9091	6.92e-05	0.991	ATCTTCACCATATGA
MLOC_14363	C2H2	HvFRF14	684	700	+	7.9697	6.95e-05	0.187	CAGAAAAGGACTAAAAA
MLOC_14363	C2H2	HvFRF2	747	763	+	7.9697	6.95e-05	0.187	CAGAAAAGGACTAAAAA
MLOC_14363	C2H2	HvFRF1	1713	1729	+	7.9697	6.95e-05	0.187	CAGAAAAGGACTAAAAA
MLOC_3855	C2H2	HvFRF8	295	313	-	9.39683	6.97e-05	0.0318	CATCCTATTATTCTTCCAC
MLOC_3855	C2H2	HvFRF17	1896	1914	-	9.38095	7.03e-05	0.0319	CATTATTGTCATCATCCTC
MLOC_57518	C2H2	HvFRF17	360	377	+	8.12121	7.04e-05	0.217	TAGATCAAGACAACACCG
MLOC_57518	C2H2	HvFRF10	1281	1298	+	8.12121	7.04e-05	0.217	TAGATCAAGACAACACCG
MLOC_29808	C2H2	HvFRF18	1081	1091	+	10.8333	7.12e-05	1	TAGTGAGGTAG
MLOC_3855	C2H2	HvFRF18	1756	1774	-	9.34127	7.17e-05	0.0324	CCCCCACCTCTGCCCCAAC
MLOC_14363	C2H2	HvFRF9	1530	1546	-	7.86364	7.19e-05	0.188	TTATAAAGGACAAGAGG
MLOC_60958	C2H2	HvFRF11	1117	1133	+	7.57576	7.22e-05	0.159	AAAAAGAAAACAACAAC
MLOC_23443	C2H2	HvFRF5	841	858	+	10.2958	7.24e-05	0.683	CATAGAAAACCTTCCTTT
MLOC_51405	C2H2	HvFRF19	1006	1012	-	12.5122	7.25e-05	1	GAAATCT
MLOC_51405	C2H2	HvFRF15	1144	1150	-	12.5122	7.25e-05	1	GAAATCT
MLOC_51405	C2H2	HvFRF4	1904	1910	-	12.5122	7.25e-05	1	GAAATCT
MLOC_3855	C2H2	HvFRF21	243	261	+	9.28571	7.38e-05	0.0331	CCGCATCATCATCAACTGC
MLOC_3855	C2H2	HvFRF14	359	377	+	9.25397	7.5e-05	0.0333	CACCCTTTCCCTCTTTTTC
MLOC_3855	C2H2	HvFRF7	663	681	+	9.25397	7.5e-05	0.0333	ACCCCCCCACCCCCACCAC
MLOC_10987	C2H2	HvFRF18	1037	1051	-	10.7879	7.54e-05	0.991	ACCGTCCCCATCTAT
MLOC_57518	C2H2	HvFRF15	322	339	-	7.92424	7.56e-05	0.217	AGAAAGGAGCCAAAATAA
MLOC_3855	C2H2	HvFRF22	500	518	+	9.2381	7.56e-05	0.0334	CCCTACCCCCCACCCCCAC
MLOC_57518	C2H2	HvFRF21	1679	1696	+	7.90909	7.6e-05	0.217	GGAAATACAACAAAAATA
MLOC_76196	C2H2	HvFRF8	1454	1466	+	10.1818	7.72e-05	1	ATTAAGTGTGCTA
MLOC_3855	C2H2	HvFRF20	1827	1845	+	9.1746	7.81e-05	0.0342	CTCTTTCTCCCTCTGCATC
MLOC_60958	C2H2	HvFRF7	1135	1151	+	7.33333	7.86e-05	0.161	AAAAAGAAAACAACAAG
MLOC_60958	C2H2	HvFRF1	1876	1892	+	7.31818	7.9e-05	0.161	TGTTACAGAACAAAAAA
MLOC_3855	C2H2	HvFRF4	1808	1826	+	9.15079	7.91e-05	0.0342	TTTTACCTTCCTTCTCCTA
MLOC_3855	C2H2	HvFRF9	872	890	+	9.14286	7.94e-05	0.0342	CCTCTGGATCTTCATCTTC
MLOC_10987	C2H2	HvFRF15	1231	1245	+	10.7121	7.95e-05	0.991	ACCACCACCAGAACG
MLOC_3855	C2H2	HvFRF13	1879	1897	-	9.12698	8e-05	0.0342	CATTTTCTTCATTCTCATT
MLOC_78652	C2H2	HvFRF21	541	560	+	7.15152	8.06e-05	0.329	AAAAAAATGACGAAGCTGTA
MLOC_3855	C2H2	HvFRF14	409	427	+	9.10317	8.1e-05	0.0342	TCTACCTCTCCCCCACCAC
MLOC_3855	C2H2	HvFRF22	458	476	+	9.10317	8.1e-05	0.0342	TCTACCTCTCCCCCACCAC
MLOC_3855	C2H2	HvFRF9	470	488	+	9.10317	8.1e-05	0.0342	TCTACCTCTCCCCCACCAC
MLOC_1876	C2H2	HvFRF3	278	289	+	10.3235	8.16e-05	0.366	TTTTCTTTTGCT
MLOC_3855	C2H2	HvFRF16	1572	1590	-	9.0873	8.17e-05	0.0342	CCTGCCCCTCCTCTCCTCC
MLOC_3855	C2H2	HvFRF16	1599	1617	-	9.0873	8.17e-05	0.0342	CCTGCCCCTCCTCTCCTCC
MLOC_3855	C2H2	HvFRF16	1626	1644	-	9.0873	8.17e-05	0.0342	CCTGCCCCTCCTCTCCTCC
MLOC_52196	C2H2	HvFRF1	179	185	-	13.4474	8.21e-05	0.429	TTGAAAA
MLOC_52196	C2H2	HvFRF3	332	338	-	13.4474	8.21e-05	0.429	TTGAAAA
MLOC_52196	C2H2	HvFRF1	447	453	-	13.4474	8.21e-05	0.429	TTGAAAA
MLOC_52196	C2H2	HvFRF15	684	690	-	13.4474	8.21e-05	0.429	TTGAAAA
MLOC_52196	C2H2	HvFRF1	795	801	-	13.4474	8.21e-05	0.429	TTGAAAA
MLOC_52196	C2H2	HvFRF12	1759	1765	-	13.4474	8.21e-05	0.429	TTGAAAA
MLOC_52196	C2H2	HvFRF8	1989	1995	-	13.4474	8.21e-05	0.429	TTGAAAA
MLOC_52196	C2H2	HvFRF11	14	20	+	13.4474	8.21e-05	0.429	TTGAAAA
MLOC_52196	C2H2	HvFRF11	79	85	+	13.4474	8.21e-05	0.429	TTGAAAA
MLOC_52196	C2H2	HvFRF1	108	114	+	13.4474	8.21e-05	0.429	TTGAAAA
MLOC_52196	C2H2	HvFRF1	376	382	+	13.4474	8.21e-05	0.429	TTGAAAA
MLOC_52196	C2H2	HvFRF15	585	591	+	13.4474	8.21e-05	0.429	TTGAAAA
MLOC_52196	C2H2	HvFRF10	885	891	+	13.4474	8.21e-05	0.429	TTGAAAA
MLOC_52196	C2H2	HvFRF12	1095	1101	+	13.4474	8.21e-05	0.429	TTGAAAA
MLOC_52196	C2H2	HvFRF15	1138	1144	+	13.4474	8.21e-05	0.429	TTGAAAA
MLOC_52196	C2H2	HvFRF8	1559	1565	+	13.4474	8.21e-05	0.429	TTGAAAA
MLOC_78652	C2H2	HvFRF18	1542	1561	+	7.09091	8.22e-05	0.329	GCTATTCAGACAAAAAATGT
MLOC_14363	C2H2	HvFRF21	82	98	+	7.45455	8.22e-05	0.203	GAGTACAAGACAAGTTA
MLOC_57518	C2H2	HvFRF6	481	498	+	7.68182	8.24e-05	0.217	TTGTAGGTGACAAAAAAA
MLOC_3855	C2H2	HvFRF7	611	629	+	9.05556	8.3e-05	0.0346	CCCTCCCCCTCTCCCCCCC
MLOC_65033	C2H2	HvFRF8	1140	1150	+	10.9254	8.39e-05	1	TAGTTTCACTA
MLOC_54674	C2H2	HvFRF8	1140	1150	+	10.9254	8.39e-05	1	TAGTTTCACTA
MLOC_57518	C2H2	HvFRF20	1897	1914	+	7.62121	8.42e-05	0.217	GGAAAAAAAACAAAAGTT
MLOC_78652	C2H2	HvFRF17	360	379	+	7.01515	8.43e-05	0.329	TAGATCAAGACAACACCGGA
MLOC_78652	C2H2	HvFRF10	1281	1300	+	7.01515	8.43e-05	0.329	TAGATCAAGACAACACCGGA
MLOC_60958	C2H2	HvFRF19	1103	1119	-	7.12121	8.44e-05	0.161	CAGATGGAGACAATATA
MLOC_60958	C2H2	HvFRF16	116	132	+	7.10606	8.49e-05	0.161	AAAAACTAGACAAACAA
MLOC_60958	C2H2	HvFRF7	1564	1580	-	7.10606	8.49e-05	0.161	AGCAACATGACAACTAC
MLOC_14363	C2H2	HvFRF17	360	376	+	7.34848	8.51e-05	0.203	TAGATCAAGACAACACC
MLOC_14363	C2H2	HvFRF10	1281	1297	+	7.34848	8.51e-05	0.203	TAGATCAAGACAACACC
MLOC_57518	C2H2	HvFRF19	1077	1094	+	7.57576	8.55e-05	0.217	ACAAAAAAGTCAAAAACA
MLOC_3855	C2H2	HvFRF16	1650	1668	-	8.96825	8.67e-05	0.036	CTCCCATCTTCTCCACAGC
MLOC_29808	C2H2	HvFRF17	1820	1830	-	10.697	8.71e-05	1	AAGTGTAAGTG
MLOC_79967	C2H2	HvFRF20	29	36	-	10.6061	8.73e-05	1	TTTAGTAG
MLOC_79967	C2H2	HvFRF5	1120	1127	+	10.6061	8.73e-05	1	TTTAGTAG
MLOC_57518	C2H2	HvFRF21	541	558	+	7.51515	8.74e-05	0.217	AAAAAAATGACGAAGCTG
MLOC_3855	C2H2	HvFRF6	690	708	+	8.94444	8.78e-05	0.0362	CCTTTCCCGCCTCCTTTAT
MLOC_60958	C2H2	HvFRF7	1059	1075	+	7	8.8e-05	0.161	CAAAAAAAGTCAGAAAA
MLOC_60958	C2H2	HvFRF20	1571	1587	+	7	8.8e-05	0.161	GGAAAAACAACAACACA
MLOC_78652	C2H2	HvFRF9	1527	1546	-	6.87879	8.8e-05	0.329	TTATAAAGGACAAGAGGTCA
MLOC_14363	C2H2	HvFRF1	533	549	+	7.21212	8.89e-05	0.206	GAAAAAAAAACAGAAAA
MLOC_1876	C2H2	HvFRF16	472	483	-	10.2353	8.96e-05	0.382	TTGTGTCTTCCG
MLOC_60958	C2H2	HvFRF6	481	497	+	6.93939	8.98e-05	0.161	TTGTAGGTGACAAAAAA
MLOC_3855	C2H2	HvFRF9	869	887	+	8.87302	9.1e-05	0.0374	CTCCCTCTGGATCTTCATC
MLOC_57518	C2H2	HvFRF7	1059	1076	+	7.37879	9.17e-05	0.217	CAAAAAAAGTCAGAAAAA
MLOC_29808	C2H2	HvFRF20	1537	1547	-	10.6515	9.18e-05	1	GAGTGAAAGTT
MLOC_60958	C2H2	HvFRF21	541	557	+	6.86364	9.21e-05	0.161	AAAAAAATGACGAAGCT
MLOC_65033	C2H2	HvFRF2	233	243	+	10.8209	9.22e-05	1	CAGTGTCAGTC
MLOC_54674	C2H2	HvFRF2	233	243	+	10.8209	9.22e-05	1	CAGTGTCAGTC
MLOC_3855	C2H2	HvFRF11	670	688	+	8.84127	9.25e-05	0.0378	ATCTCTTCTCCCCTTCTTC
MLOC_60958	C2H2	HvFRF13	222	238	+	6.84848	9.26e-05	0.161	GACTTAATGACAAGACG
MLOC_57518	C2H2	HvFRF13	1472	1489	+	7.33333	9.31e-05	0.217	AACAACAAGACAATGTCT
MLOC_78652	C2H2	HvFRF21	1626	1645	+	6.69697	9.33e-05	0.329	AACACACAGACAAAAAAAAA
MLOC_3855	C2H2	HvFRF6	130	148	-	8.81746	9.36e-05	0.0379	TCTTCTCCACTTTCTCATG
MLOC_3855	C2H2	HvFRF7	615	633	+	8.81746	9.36e-05	0.0379	CCCCCTCTCCCCCCCCACC
MLOC_78652	C2H2	HvFRF21	82	101	+	6.68182	9.37e-05	0.329	GAGTACAAGACAAGTTACAT
MLOC_57518	C2H2	HvFRF16	116	133	+	7.30303	9.41e-05	0.217	AAAAACTAGACAAACAAT
MLOC_3855	C2H2	HvFRF17	1914	1932	-	8.78571	9.51e-05	0.0383	CATCATTGTTATCATCCTC
MLOC_1876	C2H2	HvFRF13	1016	1027	-	10.1667	9.57e-05	0.388	TTTTCCTTTTTT
MLOC_57518	C2H2	HvFRF1	513	530	+	7.24242	9.61e-05	0.217	AAAGAAGAGACAGAAAAC
MLOC_60958	C2H2	HvFRF1	1600	1616	+	6.69697	9.74e-05	0.166	AGAAAACAGACAATTTT
MLOC_14363	C2H2	HvFRF8	527	543	-	6.90909	9.78e-05	0.219	TATGTGGGGACAAAAAT
MLOC_76196	C2H2	HvFRF18	1287	1299	-	10	9.78e-05	1	CCATAGTGTGTTC
MLOC_10987	C2H2	HvFRF3	1394	1408	-	10.4091	9.81e-05	1	ACCTTTGCCAGATAC
MLOC_78652	C2H2	HvFRF1	51	70	+	6.51515	9.88e-05	0.333	TTGTTGAAGACAACAACATT
MLOC_3855	C2H2	HvFRF7	666	684	+	8.70635	9.89e-05	0.0396	CCCCCACCCCCACCACCGT
MLOC_57518	C2H2	HvFRF14	1467	1484	-	7.15152	9.92e-05	0.217	TATAAAGGGACAAGAGGT
MLOC_57518	C2H2	HvFRF22	1530	1547	-	7.15152	9.92e-05	0.217	TATAAAGGGACAAGAGGT
MLOC_57518	C2H2	HvFRF2	1532	1549	-	7.15152	9.92e-05	0.217	TATAAAGGGACAAGAGGT
MLOC_3855	C2H2	HvFRF16	1519	1537	-	8.69841	9.93e-05	0.0396	CGCCCCTCCTCTTCTCCTC
MLOC_14363	C2H2	HvFRF21	541	557	+	6.84848	9.96e-05	0.219	AAAAAAATGACGAAGCT
MLOC_60958	C2H2	HvFRF21	1626	1642	+	6.62121	9.99e-05	0.167	AACACACAGACAAAAAA
MLOC_64012	CPP	HvFRF9	64	73	+	14.09	1.54e-06	0.126	AATTTGAATT
MLOC_51353	CPP	HvFRF15	579	591	+	12.91	5.81e-06	0.288	CAAAATTTGAAAA
MLOC_64012	CPP	HvFRF15	174	183	-	13.62	8.51e-06	0.348	TATTTGAATT
MLOC_51353	CPP	HvFRF11	82	94	+	12.11	1.61e-05	0.288	AAAAATTTAAAGG
MLOC_51353	CPP	HvFRF1	271	283	-	11.97	1.82e-05	0.288	CTGAATTTTAAAA
MLOC_51353	CPP	HvFRF11	16	28	+	11.9	2.02e-05	0.288	GAAAATTTTGATA
MLOC_64012	CPP	HvFRF2	195	204	-	13.09	2.18e-05	0.403	TATTTGAATA
MLOC_51353	CPP	HvFRF1	253	265	+	11.79	2.24e-05	0.288	TAAAATTTTGAAC
MLOC_51353	CPP	HvFRF4	1600	1612	-	11.79	2.24e-05	0.288	ATAAATTTTACAT
MLOC_64012	CPP	HvFRF1	920	929	+	12.77	2.45e-05	0.403	AATTTGAACT
MLOC_51353	CPP	HvFRF1	431	443	+	11.66	2.6e-05	0.288	CGAAATTTAGAAC
MLOC_51353	CPP	HvFRF1	250	262	-	11.55	3.04e-05	0.288	CAAAATTTTATTC
MLOC_64012	CPP	HvFRF11	1574	1583	-	12.56	3.07e-05	0.403	TGTTTGAATT
MLOC_64012	CPP	HvFRF7	1592	1601	-	12.56	3.07e-05	0.403	TGTTTGAATT
MLOC_51353	CPP	HvFRF3	1151	1163	+	11.41	3.57e-05	0.288	AGAAATTTAGATA
MLOC_51353	CPP	HvFRF11	13	25	-	11.41	3.57e-05	0.288	CAAAATTTTCAAT
MLOC_51353	CPP	HvFRF1	917	929	+	11.33	3.89e-05	0.288	CGAAATTTGAACT
MLOC_64012	CPP	HvFRF10	1814	1823	-	12.24	4.38e-05	0.403	AATTTGAACA
MLOC_51353	CPP	HvFRF15	312	324	+	11.18	4.69e-05	0.319	CAAAATTTAATTA
MLOC_64012	CPP	HvFRF4	1489	1498	-	12.21	4.86e-05	0.403	TGTTTGAATC
MLOC_64012	CPP	HvFRF12	1612	1621	+	12.21	4.86e-05	0.403	TGTTTGAATG
MLOC_51353	CPP	HvFRF6	982	994	+	11.06	5.34e-05	0.33	ATACATTTTAAAA
MLOC_64012	CPP	HvFRF9	24	33	+	12.13	5.46e-05	0.403	AATTTAAATT
MLOC_64012	CPP	HvFRF9	24	33	-	12.13	5.46e-05	0.403	AATTTAAATT
MLOC_51353	CPP	HvFRF8	433	445	-	11	5.67e-05	0.33	ACCAATTTTAACA
MLOC_64012	CPP	HvFRF17	557	566	-	11.66	7.27e-05	0.403	TATTTAAATT
MLOC_64012	CPP	HvFRF10	1478	1487	-	11.66	7.27e-05	0.403	TATTTAAATT
MLOC_64012	CPP	HvFRF5	1169	1178	-	11.62	7.69e-05	0.403	CTTTTGAATT
MLOC_51353	CPP	HvFRF5	1629	1641	+	10.68	7.82e-05	0.402	ACAAATTTTCATT
MLOC_64012	CPP	HvFRF17	557	566	+	11.6	7.87e-05	0.403	AATTTAAATA
MLOC_64012	CPP	HvFRF10	1478	1487	+	11.6	7.87e-05	0.403	AATTTAAATA
MLOC_51353	CPP	HvFRF16	352	364	+	10.61	8.31e-05	0.402	CAAAATTTTGCTA
MLOC_51353	CPP	HvFRF15	596	608	-	10.6	8.37e-05	0.402	AGAAATTGTAATA
MLOC_64012	CPP	HvFRF6	497	506	-	11.44	8.84e-05	0.426	TTTTTGAATT
MLOC_51353	CPP	HvFRF3	1502	1514	-	10.53	9.05e-05	0.403	AGGAATTTTAAGC
MLOC_51353	CPP	HvFRF11	288	300	-	10.44	9.89e-05	0.403	CAACATTTTAAGA
MLOC_51353	CPP	HvFRF1	428	440	-	10.44	9.89e-05	0.403	CTAAATTTCGAAT
MLOC_73724	Dof	HvFRF7	350	370	-	21.4697	1.29e-09	0.000104	ATAAAATAAAAAAAGTAAAAA
MLOC_17236	Dof	HvFRF7	352	372	+	22.803	1.6e-09	0.000127	TTTACTTTTTTTATTTTATTT
MLOC_17236	Dof	HvFRF7	343	363	+	20.4697	2.79e-08	0.00111	GTTTCTTTTTTTACTTTTTTT
MLOC_73724	Dof	HvFRF1	318	338	+	18.6364	8.38e-08	0.00336	GTAAAAGTAAAAAAGTGAAAA
MLOC_64612	Dof	HvFRF7	349	362	-	16.803	1.25e-07	0.0102	AAAAAAGTAAAAAA
MLOC_17236	Dof	HvFRF1	316	336	-	18.7879	1.58e-07	0.00402	TTCACTTTTTTACTTTTACTA
MLOC_17236	Dof	HvFRF7	344	364	+	18.2273	2.68e-07	0.00402	TTTCTTTTTTTACTTTTTTTA
MLOC_73724	Dof	HvFRF1	310	330	+	17.4848	3.25e-07	0.00647	AAGGAATAGTAAAAGTAAAAA
MLOC_17236	Dof	HvFRF1	308	328	-	18.0152	3.26e-07	0.00402	TTTACTTTTACTATTCCTTTT
MLOC_17236	Dof	HvFRF22	613	633	-	18.0152	3.26e-07	0.00402	TTTTCTTTATGCTTTTTCTGT
MLOC_17236	Dof	HvFRF7	345	365	+	17.9242	3.54e-07	0.00402	TTCTTTTTTTACTTTTTTTAT
MLOC_73724	Dof	HvFRF7	341	361	-	17.3485	3.78e-07	0.00647	AAAAAGTAAAAAAAGAAACAA
MLOC_73724	Dof	HvFRF22	615	635	+	17.2879	4.04e-07	0.00647	AGAAAAAGCATAAAGAAAAGA
MLOC_17236	Dof	HvFRF7	353	373	+	17.1364	7.06e-07	0.00702	TTACTTTTTTTATTTTATTTT
MLOC_73724	Dof	HvFRF12	360	380	+	16.4545	9.63e-07	0.0129	TAAAATTGGGAAAAGGAAAAA
MLOC_64612	Dof	HvFRF13	1016	1029	+	15.6667	1.1e-06	0.0418	AAAAAAGGAAAATA
MLOC_17236	Dof	HvFRF20	1896	1916	-	16.5	1.2e-06	0.0106	CTAACTTTTGTTTTTTTTCCA
MLOC_56598	Dof	HvFRF7	1720	1729	+	12.3182	1.2e-06	0.0774	AAAAAAGTGC
MLOC_73724	Dof	HvFRF5	946	966	+	16.1667	1.28e-06	0.0147	AGAAGACCGAAAAAGTGGAAA
MLOC_64612	Dof	HvFRF5	954	967	+	15.4545	1.54e-06	0.0418	GAAAAAGTGGAAAA
MLOC_73724	Dof	HvFRF13	1043	1063	+	15.7576	1.89e-06	0.019	GAAAGGAGAAAAAAGGAGGAA
MLOC_17236	Dof	HvFRF7	346	366	+	15.3182	3.01e-06	0.0239	TCTTTTTTTACTTTTTTTATT
MLOC_64612	Dof	HvFRF1	326	339	+	14.9091	3.23e-06	0.0567	AAAAAAGTGAAAAC
MLOC_64612	Dof	HvFRF18	1234	1247	-	14.8485	3.47e-06	0.0567	CAAAAAGGAATTAA
MLOC_73724	Dof	HvFRF18	711	731	-	15.0758	3.5e-06	0.0312	TAAGAATGTAAAAAGGGAACA
MLOC_56598	Dof	HvFRF2	249	258	-	12.2273	3.62e-06	0.0774	AAAAAAGTGA
MLOC_56598	Dof	HvFRF1	326	335	+	12.2273	3.62e-06	0.0774	AAAAAAGTGA
MLOC_56598	Dof	HvFRF11	1702	1711	+	12.2273	3.62e-06	0.0774	AAAAAAGTGA
MLOC_17236	Dof	HvFRF1	526	546	-	14.9848	3.85e-06	0.0254	TCTGTTTTTTTTTCTTGTTTT
MLOC_17236	Dof	HvFRF21	1687	1707	-	14.9697	3.89e-06	0.0254	AAATCTTTTTTTATTTTTGTT
MLOC_17236	Dof	HvFRF5	1435	1455	-	14.8788	4.16e-06	0.0254	TCTTCTTTTCATTTCATTGTT
MLOC_73724	Dof	HvFRF4	1939	1959	+	14.7273	4.73e-06	0.0372	AGATTACAAAAAAAGGAGAAT
MLOC_73724	Dof	HvFRF13	1750	1770	+	14.6364	5.1e-06	0.0372	CTAAAGTAAAAAAAGCAAATT
MLOC_17236	Dof	HvFRF7	347	367	+	14.5455	5.27e-06	0.0294	CTTTTTTTACTTTTTTTATTT
MLOC_17236	Dof	HvFRF3	278	298	+	14.3788	5.93e-06	0.0294	TTTTCTTTTGCTCCCTTATTA
MLOC_17236	Dof	HvFRF1	522	542	-	14.303	6.25e-06	0.0294	TTTTTTTTTCTTGTTTTCTGT
MLOC_17236	Dof	HvFRF7	333	353	+	14.2424	6.52e-06	0.0294	TAGATTTTTTGTTTCTTTTTT
MLOC_73724	Dof	HvFRF21	1748	1768	+	14.3182	6.64e-06	0.042	ACAGGAAAAAAAAAGAAGCAA
MLOC_17236	Dof	HvFRF12	576	596	+	14.2121	6.65e-06	0.0294	CCAACTTTTAATCTTTTTTGA
MLOC_64612	Dof	HvFRF4	1947	1960	+	14.2727	6.77e-06	0.0921	AAAAAAGGAGAATA
MLOC_73724	Dof	HvFRF20	1898	1918	+	14.2879	6.8e-06	0.042	GAAAAAAAACAAAAGTTAGCT
MLOC_61071	Dof	HvFRF1	326	336	+	13.5909	7.2e-06	0.223	AAAAAAGTGAA
MLOC_17236	Dof	HvFRF13	1041	1061	-	14	7.69e-06	0.0306	CCTCCTTTTTTCTCCTTTCCT
MLOC_17236	Dof	HvFRF21	1746	1766	-	14	7.69e-06	0.0306	GCTTCTTTTTTTTTCCTGTGT
MLOC_61071	Dof	HvFRF11	491	501	-	13.5303	8.12e-06	0.223	CAAAAAGTGGA
MLOC_61071	Dof	HvFRF7	503	513	-	13.5303	8.12e-06	0.223	CAAAAAGTGGA
MLOC_64612	Dof	HvFRF20	1888	1901	+	14.0909	8.18e-06	0.0954	AAAAAAGTTGGAAA
MLOC_17236	Dof	HvFRF22	179	199	-	13.803	8.79e-06	0.0333	GCTTCTTTTATTTTTATGCTT
MLOC_64612	Dof	HvFRF19	1079	1092	+	13.9242	9.72e-06	0.0965	AAAAAAGTCAAAAA
MLOC_73724	Dof	HvFRF22	892	912	+	13.803	9.98e-06	0.0534	ACAGAAACAAAAAAGTCAGAA
MLOC_73724	Dof	HvFRF2	895	915	+	13.803	9.98e-06	0.0534	ACAGAAACAAAAAAGTCAGAA
MLOC_64612	Dof	HvFRF3	898	911	-	13.8333	1.06e-05	0.0965	GAAAAAGTAGCATA
MLOC_17236	Dof	HvFRF5	1229	1249	-	13.5	1.07e-05	0.0388	GCTACTTTTCACATTTTTTGC
MLOC_61071	Dof	HvFRF5	954	964	+	13.3939	1.11e-05	0.228	GAAAAAGTGGA
MLOC_17236	Dof	HvFRF12	358	378	-	13.3939	1.15e-05	0.0389	TTTCCTTTTCCCAATTTTACT
MLOC_17236	Dof	HvFRF20	1411	1431	+	13.3636	1.17e-05	0.0389	ATTCCTTTTTTTTTTCTGAAA
MLOC_56598	Dof	HvFRF11	1307	1316	+	11.8273	1.22e-05	0.131	CAAAAAGTAC
MLOC_56598	Dof	HvFRF7	1325	1334	+	11.8273	1.22e-05	0.131	CAAAAAGTAC
MLOC_56598	Dof	HvFRF8	1122	1131	-	11.8273	1.22e-05	0.131	CAAAAAGTAC
MLOC_17236	Dof	HvFRF1	523	543	-	13.2576	1.26e-05	0.0398	GTTTTTTTTTCTTGTTTTCTG
MLOC_73724	Dof	HvFRF20	1409	1429	-	13.4091	1.35e-05	0.064	TCAGAAAAAAAAAAGGAATCT
MLOC_56598	Dof	HvFRF7	353	362	-	11.7909	1.37e-05	0.131	AAAAAAGTAA
MLOC_56598	Dof	HvFRF18	855	864	-	11.7909	1.37e-05	0.131	AAAAAAGTAA
MLOC_17236	Dof	HvFRF22	890	910	-	13.1212	1.37e-05	0.0398	CTGACTTTTTTGTTTCTGTAA
MLOC_17236	Dof	HvFRF2	893	913	-	13.1212	1.37e-05	0.0398	CTGACTTTTTTGTTTCTGTAA
MLOC_17236	Dof	HvFRF18	854	874	+	13.0909	1.4e-05	0.0398	GTTACTTTTTTCCCTAGATCT
MLOC_64612	Dof	HvFRF18	710	723	-	13.5	1.46e-05	0.115	TAAAAAGGGAACAA
MLOC_61071	Dof	HvFRF7	352	362	-	13.1818	1.47e-05	0.241	AAAAAAGTAAA
MLOC_73724	Dof	HvFRF13	1008	1028	+	13.2727	1.49e-05	0.064	GGTTGTGAAAAAAAGGAAAAT
MLOC_64612	Dof	HvFRF18	1413	1426	-	13.4394	1.54e-05	0.115	AAAAAAGGCAAAAA
MLOC_73724	Dof	HvFRF3	276	296	-	13.0758	1.72e-05	0.064	ATAAGGGAGCAAAAGAAAATT
MLOC_73724	Dof	HvFRF3	899	919	-	13.0758	1.72e-05	0.064	CAGTACAAGAAAAAGTAGCAT
MLOC_17236	Dof	HvFRF5	944	964	-	12.7121	1.78e-05	0.0475	TCCACTTTTTCGGTCTTCTTC
MLOC_17236	Dof	HvFRF8	1276	1296	-	12.697	1.79e-05	0.0475	TCAACTTTCTCCTTTCCTTTC
MLOC_73724	Dof	HvFRF13	117	137	+	13.0152	1.79e-05	0.064	CTAAACTGAAAAAAGGCAAAA
MLOC_73724	Dof	HvFRF13	1741	1761	+	13	1.81e-05	0.064	GTGAAGGGCCTAAAGTAAAAA
MLOC_73724	Dof	HvFRF8	540	560	+	12.9848	1.83e-05	0.064	CATATATAAAAAAAGGAAGGA
MLOC_17236	Dof	HvFRF4	1937	1957	-	12.6061	1.9e-05	0.0487	TCTCCTTTTTTTGTAATCTAT
MLOC_17236	Dof	HvFRF1	544	564	-	12.5152	2.01e-05	0.0498	CTTTTTTTTTACCCATTTTCT
MLOC_61071	Dof	HvFRF19	538	548	-	12.9394	2.08e-05	0.25	CAAAAAGGGGA
MLOC_73724	Dof	HvFRF5	1231	1251	+	12.803	2.08e-05	0.064	AAAAAATGTGAAAAGTAGCCT
MLOC_17236	Dof	HvFRF7	1137	1157	-	12.4394	2.1e-05	0.05	CTTTCTCTTGTTGTTTTCTTT
MLOC_64612	Dof	HvFRF11	1702	1715	+	13.0606	2.13e-05	0.123	AAAAAAGTGATTTT
MLOC_73724	Dof	HvFRF11	489	509	-	12.7273	2.2e-05	0.064	GTACATACCAAAAAGTGGAAG
MLOC_73724	Dof	HvFRF7	501	521	-	12.7273	2.2e-05	0.064	GTACATACCAAAAAGTGGAAG
MLOC_73724	Dof	HvFRF19	536	556	-	12.7273	2.2e-05	0.064	AGACATACCAAAAAGGGGAAG
MLOC_64612	Dof	HvFRF12	368	381	+	13.0152	2.22e-05	0.123	GGAAAAGGAAAAAA
MLOC_64612	Dof	HvFRF14	978	991	-	13.0152	2.22e-05	0.123	CATAAAGTGAGAAT
MLOC_61071	Dof	HvFRF18	713	723	-	12.8939	2.24e-05	0.25	TAAAAAGGGAA
MLOC_73724	Dof	HvFRF1	480	500	+	12.697	2.24e-05	0.064	ACTTAGTTTAAAAAGATAAAA
MLOC_17236	Dof	HvFRF7	354	374	+	12.303	2.28e-05	0.05	TACTTTTTTTATTTTATTTTG
MLOC_73724	Dof	HvFRF4	376	396	-	12.6667	2.29e-05	0.064	ATGGTGAGCCAAAAGGAAATA
MLOC_73724	Dof	HvFRF20	1586	1606	+	12.6515	2.31e-05	0.064	CAAGCAACAAAAAAGGTGACA
MLOC_17236	Dof	HvFRF18	1843	1863	+	12.2727	2.32e-05	0.05	TTTATTTTTTGTAATTACTAT
MLOC_17236	Dof	HvFRF13	1748	1768	-	12.2576	2.34e-05	0.05	TTTGCTTTTTTTACTTTAGGC
MLOC_17236	Dof	HvFRF18	1407	1427	+	12.2424	2.37e-05	0.05	TTAGTTTTTTTGCCTTTTTTG
MLOC_17236	Dof	HvFRF13	1564	1584	-	12.2273	2.39e-05	0.05	CTATTTTTTTCATGTTTTTGT
MLOC_17236	Dof	HvFRF1	527	547	-	12.1667	2.48e-05	0.0505	TTCTGTTTTTTTTTCTTGTTT
MLOC_56598	Dof	HvFRF13	1919	1928	-	11.4727	2.58e-05	0.221	AAAAAAGCGT
MLOC_17236	Dof	HvFRF15	1548	1568	-	12.0606	2.64e-05	0.0516	TAGTCTTTTTTCCCTCCCTTT
MLOC_17236	Dof	HvFRF21	1685	1705	-	12.0455	2.66e-05	0.0516	ATCTTTTTTTATTTTTGTTGT
MLOC_73724	Dof	HvFRF14	1534	1554	-	12.3939	2.76e-05	0.0719	AGACAATTTATAAAGGAACAA
MLOC_17236	Dof	HvFRF8	538	558	-	11.9545	2.81e-05	0.0524	CTTCCTTTTTTTATATATGTG
MLOC_17236	Dof	HvFRF1	315	335	-	11.9394	2.83e-05	0.0524	TCACTTTTTTACTTTTACTAT
MLOC_73724	Dof	HvFRF18	1235	1255	-	12.3485	2.84e-05	0.0719	AAATTTCTCAAAAAGGAATTA
MLOC_73724	Dof	HvFRF17	715	735	-	12.3333	2.87e-05	0.0719	AATGATTATAAAAAGATTAAA
MLOC_17236	Dof	HvFRF22	726	746	-	11.8939	2.91e-05	0.0524	TTGTTTTTTTAATCATTTTCT
MLOC_17236	Dof	HvFRF12	366	386	-	11.8636	2.96e-05	0.0524	TAAATTTTTTTCCTTTTCCCA
MLOC_73724	Dof	HvFRF5	1437	1457	+	12.2727	2.99e-05	0.0726	CAATGAAATGAAAAGAAGAAG
MLOC_17236	Dof	HvFRF7	409	429	+	11.8182	3.04e-05	0.0526	GATTCTTTTTCCTGCTATTTA
MLOC_56598	Dof	HvFRF11	492	501	-	11.4091	3.14e-05	0.224	CAAAAAGTGG
MLOC_56598	Dof	HvFRF7	504	513	-	11.4091	3.14e-05	0.224	CAAAAAGTGG
MLOC_61071	Dof	HvFRF13	1016	1026	+	12.5909	3.15e-05	0.25	AAAAAAGGAAA
MLOC_64612	Dof	HvFRF1	318	331	+	12.5606	3.18e-05	0.123	GTAAAAGTAAAAAA
MLOC_17236	Dof	HvFRF1	758	778	+	11.7424	3.18e-05	0.0538	ATTACTTTTATTTTATCTGGT
MLOC_64612	Dof	HvFRF11	488	501	-	12.5455	3.2e-05	0.123	CAAAAAGTGGAAGC
MLOC_64612	Dof	HvFRF7	500	513	-	12.5455	3.2e-05	0.123	CAAAAAGTGGAAGC
MLOC_73724	Dof	HvFRF19	1071	1091	+	12.1667	3.21e-05	0.0756	CCCAGAACAAAAAAGTCAAAA
MLOC_61071	Dof	HvFRF18	1237	1247	-	12.5758	3.21e-05	0.25	CAAAAAGGAAT
MLOC_17236	Dof	HvFRF1	543	563	-	11.697	3.26e-05	0.0541	TTTTTTTTTACCCATTTTCTG
MLOC_61071	Dof	HvFRF6	892	902	+	12.5303	3.4e-05	0.25	AAAAAAGTTAC
MLOC_73724	Dof	HvFRF1	502	522	+	12.0606	3.44e-05	0.0761	AACCGTAAAAAAAAGAAGAGA
MLOC_17236	Dof	HvFRF13	1053	1073	-	11.5909	3.47e-05	0.0545	TTCATTTTTGTTCCTCCTTTT
MLOC_73724	Dof	HvFRF19	1037	1057	-	12.0455	3.47e-05	0.0761	AAAGAGGATCAAAAGCTGAAG
MLOC_64612	Dof	HvFRF21	1788	1801	-	12.4394	3.48e-05	0.123	GAAAAAGTTGGAAG
MLOC_17236	Dof	HvFRF21	1889	1909	-	11.5758	3.5e-05	0.0545	TTAGCTTTCTGCCCTCATTTT
MLOC_64612	Dof	HvFRF8	9	22	+	12.4242	3.51e-05	0.123	GAAAAAGTTTATGA
MLOC_73724	Dof	HvFRF13	847	867	-	12.0152	3.54e-05	0.0761	TCAATACATAAAAAGGAGTAA
MLOC_73724	Dof	HvFRF11	1694	1714	+	11.9848	3.61e-05	0.0761	ATATTACAAAAAAAGTGATTT
MLOC_61071	Dof	HvFRF2	248	258	-	12.4545	3.68e-05	0.25	AAAAAAGTGAT
MLOC_61071	Dof	HvFRF11	1702	1712	+	12.4545	3.68e-05	0.25	AAAAAAGTGAT
MLOC_17236	Dof	HvFRF1	497	517	-	11.4848	3.69e-05	0.0545	TCTTTTTTTTACGGTTATTTT
MLOC_17236	Dof	HvFRF16	586	606	-	11.4848	3.69e-05	0.0545	CTTCCTTTTCTCGTTTTGGGT
MLOC_64612	Dof	HvFRF6	892	905	+	12.3485	3.7e-05	0.123	AAAAAAGTTACTTG
MLOC_17236	Dof	HvFRF4	1803	1823	+	11.4697	3.72e-05	0.0545	CTCCCTTTTACCTTCCTTCTC
MLOC_56598	Dof	HvFRF13	1758	1767	+	11.2182	3.75e-05	0.246	AAAAAAGCAA
MLOC_64612	Dof	HvFRF13	846	859	-	12.3182	3.79e-05	0.123	TAAAAAGGAGTAAT
MLOC_17236	Dof	HvFRF12	472	492	+	11.3788	3.92e-05	0.0545	TCTACTTTTGAACATTCTTAA
MLOC_17236	Dof	HvFRF18	1408	1428	+	11.3788	3.92e-05	0.0545	TAGTTTTTTTGCCTTTTTTGT
MLOC_17236	Dof	HvFRF1	764	784	+	11.3636	3.95e-05	0.0545	TTTATTTTATCTGGTTTTCTC
MLOC_64612	Dof	HvFRF8	548	561	+	12.2576	3.95e-05	0.123	AAAAAAGGAAGGAA
MLOC_61071	Dof	HvFRF14	981	991	-	12.3788	3.95e-05	0.25	CATAAAGTGAG
MLOC_73724	Dof	HvFRF4	1801	1821	-	11.8333	3.97e-05	0.0785	GAAGGAAGGTAAAAGGGAGAT
MLOC_17236	Dof	HvFRF18	713	733	+	11.2879	4.12e-05	0.0545	TTCCCTTTTTACATTCTTAGC
MLOC_73724	Dof	HvFRF16	588	608	+	11.7727	4.13e-05	0.0785	CCAAAACGAGAAAAGGAAGAA
MLOC_64612	Dof	HvFRF22	900	913	+	12.1818	4.16e-05	0.123	AAAAAAGTCAGAAA
MLOC_64612	Dof	HvFRF2	903	916	+	12.1818	4.16e-05	0.123	AAAAAAGTCAGAAA
MLOC_64612	Dof	HvFRF11	1043	1056	+	12.1818	4.16e-05	0.123	AAAAAAGTCAGAAA
MLOC_64612	Dof	HvFRF7	1061	1074	+	12.1818	4.16e-05	0.123	AAAAAAGTCAGAAA
MLOC_73724	Dof	HvFRF1	756	776	-	11.7576	4.17e-05	0.0785	CAGATAAAATAAAAGTAATCA
MLOC_73724	Dof	HvFRF21	1902	1922	+	11.7576	4.17e-05	0.0785	AAAGCTAATAAAAAGGGGTAT
MLOC_73724	Dof	HvFRF22	608	628	+	11.7424	4.21e-05	0.0785	TACCAACAGAAAAAGCATAAA
MLOC_17236	Dof	HvFRF20	1887	1907	-	11.2424	4.23e-05	0.0545	GTTTTTTTTCCAACTTTTTTG
MLOC_17236	Dof	HvFRF12	359	379	-	11.2273	4.26e-05	0.0545	TTTTCCTTTTCCCAATTTTAC
MLOC_17236	Dof	HvFRF6	1100	1120	-	11.2121	4.3e-05	0.0545	TCTTCTTTCTTTTCTCTCATC
MLOC_17236	Dof	HvFRF20	1886	1906	-	11.2121	4.3e-05	0.0545	TTTTTTTTCCAACTTTTTTGT
MLOC_64612	Dof	HvFRF20	1594	1607	+	12.1364	4.3e-05	0.123	AAAAAAGGTGACAC
MLOC_56598	Dof	HvFRF5	954	963	+	11.1364	4.33e-05	0.246	GAAAAAGTGG
MLOC_61071	Dof	HvFRF18	854	864	-	12.2879	4.4e-05	0.259	AAAAAAGTAAC
MLOC_64612	Dof	HvFRF1	488	501	+	12.1061	4.4e-05	0.123	TAAAAAGATAAAAT
MLOC_17236	Dof	HvFRF2	248	268	+	11.1515	4.45e-05	0.0545	ATCACTTTTTTAGCTCTCGAT
MLOC_17236	Dof	HvFRF7	356	376	+	11.1515	4.45e-05	0.0545	CTTTTTTTATTTTATTTTGTG
MLOC_17236	Dof	HvFRF17	717	737	+	11.1364	4.49e-05	0.0545	TAATCTTTTTATAATCATTTC
MLOC_17236	Dof	HvFRF4	1802	1822	+	11.1364	4.49e-05	0.0545	TCTCCCTTTTACCTTCCTTCT
MLOC_17236	Dof	HvFRF20	1889	1909	-	11.1212	4.52e-05	0.0545	TTGTTTTTTTTCCAACTTTTT
MLOC_64612	Dof	HvFRF19	535	548	-	12.0606	4.53e-05	0.123	CAAAAAGGGGAAGC
MLOC_56598	Dof	HvFRF6	892	901	+	11.0727	4.61e-05	0.246	AAAAAAGTTA
MLOC_17236	Dof	HvFRF18	1321	1341	-	11.0758	4.64e-05	0.0551	GATTCTCTTTCTTTTTATTAA
MLOC_64612	Dof	HvFRF17	1665	1678	-	12.0152	4.69e-05	0.123	GCAAAAGGAAAAAA
MLOC_73724	Dof	HvFRF8	1542	1562	-	11.5455	4.76e-05	0.086	TCAACATAAAAAAAGATGAAG
MLOC_17236	Dof	HvFRF22	620	640	-	11	4.84e-05	0.0559	TTGTCTCTTTTCTTTATGCTT
MLOC_64612	Dof	HvFRF20	1408	1421	-	11.9697	4.84e-05	0.123	AAAAAAGGAATCTT
MLOC_64612	Dof	HvFRF13	125	138	+	11.9697	4.84e-05	0.123	AAAAAAGGCAAAAC
MLOC_73724	Dof	HvFRF12	470	490	-	11.5152	4.85e-05	0.086	AAGAATGTTCAAAAGTAGACT
MLOC_17236	Dof	HvFRF15	372	392	+	10.9848	4.88e-05	0.0559	TATATTTTTTATCCTTTGGAT
MLOC_56598	Dof	HvFRF14	560	569	+	11.0364	4.88e-05	0.246	AAAAAAGCAT
MLOC_56598	Dof	HvFRF9	619	628	+	11.0364	4.88e-05	0.246	AAAAAAGCAT
MLOC_73724	Dof	HvFRF17	1666	1686	-	11.4848	4.94e-05	0.086	TCTGCAACGCAAAAGGAAAAA
MLOC_17236	Dof	HvFRF2	429	449	+	10.9242	5.04e-05	0.0559	CCATCCTTTCCCTCTTTTTCT
MLOC_17236	Dof	HvFRF4	1320	1340	+	10.9242	5.04e-05	0.0559	CTCCCTTTTGATCTCCCTTTT
MLOC_73724	Dof	HvFRF6	1098	1118	+	11.4394	5.08e-05	0.086	AGGATGAGAGAAAAGAAAGAA
MLOC_17236	Dof	HvFRF18	1406	1426	+	10.8939	5.13e-05	0.0559	GTTAGTTTTTTTGCCTTTTTT
MLOC_73724	Dof	HvFRF3	1035	1055	+	11.4091	5.17e-05	0.086	AGTGTTAGGAAAAAGATACAT
MLOC_17236	Dof	HvFRF6	1111	1131	-	10.8485	5.26e-05	0.0559	ATATCTTTGTTTCTTCTTTCT
MLOC_61071	Dof	HvFRF3	901	911	-	12.0909	5.29e-05	0.266	GAAAAAGTAGC
MLOC_17236	Dof	HvFRF1	542	562	-	10.8333	5.3e-05	0.0559	TTTTTTTTACCCATTTTCTGT
MLOC_73724	Dof	HvFRF21	1789	1809	-	11.3636	5.32e-05	0.086	GTTGACTGGAAAAAGTTGGAA
MLOC_17236	Dof	HvFRF3	901	921	+	10.8182	5.35e-05	0.0559	GCTACTTTTTCTTGTACTGAT
MLOC_17236	Dof	HvFRF13	1060	1080	-	10.8182	5.35e-05	0.0559	ATAATTTTTCATTTTTGTTCC
MLOC_73724	Dof	HvFRF7	1053	1073	+	11.3485	5.36e-05	0.086	CCAGAACAAAAAAAGTCAGAA
MLOC_64612	Dof	HvFRF11	1116	1129	+	11.7879	5.47e-05	0.131	CAAAAAGAAAACAA
MLOC_64612	Dof	HvFRF7	1134	1147	+	11.7879	5.47e-05	0.131	CAAAAAGAAAACAA
MLOC_17236	Dof	HvFRF1	533	553	-	10.7727	5.48e-05	0.0566	CCCATTTTCTGTTTTTTTTTC
MLOC_61071	Dof	HvFRF8	9	19	+	12.0303	5.61e-05	0.266	GAAAAAGTTTA
MLOC_17236	Dof	HvFRF7	339	359	+	10.7273	5.62e-05	0.057	TTTTGTTTCTTTTTTTACTTT
MLOC_17236	Dof	HvFRF20	1890	1910	-	10.7121	5.66e-05	0.057	TTTGTTTTTTTTCCAACTTTT
MLOC_64612	Dof	HvFRF13	1051	1064	+	11.7121	5.74e-05	0.134	AAAAAAGGAGGAAC
MLOC_17236	Dof	HvFRF12	1166	1186	-	10.6667	5.8e-05	0.0577	GAAGCTTTTATTTTCTCTTAT
MLOC_56598	Dof	HvFRF8	384	393	+	10.8909	5.88e-05	0.252	AAAAAAGTTT
MLOC_56598	Dof	HvFRF13	1627	1636	+	10.8909	5.88e-05	0.252	AAAAAAGTTT
MLOC_17236	Dof	HvFRF1	484	504	-	10.6212	5.95e-05	0.0577	GTTATTTTATCTTTTTAAACT
MLOC_17236	Dof	HvFRF8	543	563	-	10.6061	6e-05	0.0577	CTTTCCTTCCTTTTTTTATAT
MLOC_17236	Dof	HvFRF19	1039	1059	+	10.5909	6.04e-05	0.0577	TCAGCTTTTGATCCTCTTTCC
MLOC_17236	Dof	HvFRF6	297	317	+	10.5758	6.09e-05	0.0577	TTTAGTTTTGTATTTTTAGTT
MLOC_73724	Dof	HvFRF22	181	201	+	11.1061	6.2e-05	0.0888	GCATAAAAATAAAAGAAGCAA
MLOC_73724	Dof	HvFRF3	325	345	-	11.1061	6.2e-05	0.0888	TAGAAAATTGAAAAGAGACAT
MLOC_73724	Dof	HvFRF4	1330	1350	-	11.1061	6.2e-05	0.0888	GGAGAATGGCAAAAGGGAGAT
MLOC_17236	Dof	HvFRF13	1042	1062	-	10.5303	6.24e-05	0.0577	TCCTCCTTTTTTCTCCTTTCC
MLOC_17236	Dof	HvFRF13	1666	1686	-	10.5303	6.24e-05	0.0577	TTTATTTTTTTCATCTGTCCC
MLOC_64612	Dof	HvFRF9	309	322	-	11.5758	6.26e-05	0.141	TAAAAAGTTTCATA
MLOC_73724	Dof	HvFRF1	1797	1817	-	11.0758	6.31e-05	0.0888	GGTGCAAAGAAAAAGAGAGAG
MLOC_17236	Dof	HvFRF1	478	498	-	10.5	6.35e-05	0.0579	TTATCTTTTTAAACTAAGTTC
MLOC_73724	Dof	HvFRF14	1472	1492	-	11.0606	6.36e-05	0.0888	AGACAATTTATAAAGGGACAA
MLOC_73724	Dof	HvFRF22	1535	1555	-	11.0606	6.36e-05	0.0888	AGACAATTTATAAAGGGACAA
MLOC_73724	Dof	HvFRF2	1537	1557	-	11.0606	6.36e-05	0.0888	AGACAATTTATAAAGGGACAA
MLOC_64612	Dof	HvFRF18	851	864	-	11.5455	6.39e-05	0.141	AAAAAAGTAACCTC
MLOC_73724	Dof	HvFRF22	620	640	+	11.0303	6.48e-05	0.0888	AAGCATAAAGAAAAGAGACAA
MLOC_56598	Dof	HvFRF9	1600	1609	-	10.8364	6.48e-05	0.252	CAAAAAGTTT
MLOC_56598	Dof	HvFRF2	1601	1610	-	10.8364	6.48e-05	0.252	CAAAAAGTTT
MLOC_56598	Dof	HvFRF16	1847	1856	-	10.8364	6.48e-05	0.252	GAAAAAGTTC
MLOC_17236	Dof	HvFRF22	408	428	+	10.4545	6.5e-05	0.0579	CCACCCTTTCCTTCTTTTTCT
MLOC_73724	Dof	HvFRF14	365	385	-	11.0152	6.53e-05	0.0888	TCAGAACAGAAAAAGAGGGAA
MLOC_17236	Dof	HvFRF22	178	198	-	10.4394	6.55e-05	0.0579	CTTCTTTTATTTTTATGCTTT
MLOC_64612	Dof	HvFRF7	340	353	-	11.5	6.56e-05	0.141	AAAAAAGAAACAAA
MLOC_17236	Dof	HvFRF21	1686	1706	-	10.4242	6.61e-05	0.0579	AATCTTTTTTTATTTTTGTTG
MLOC_17236	Dof	HvFRF13	1291	1311	-	10.4091	6.66e-05	0.0579	GTGTCTTTCCCCTTTTGTTAT
MLOC_73724	Dof	HvFRF19	374	394	-	10.9697	6.71e-05	0.089	CATATGATGTAAAAGTGGAAT
MLOC_17236	Dof	HvFRF3	327	347	+	10.3788	6.77e-05	0.0579	GTCTCTTTTCAATTTTCTAGA
MLOC_17236	Dof	HvFRF4	593	613	+	10.3788	6.77e-05	0.0579	TTTATTTTATATTTCATATGT
MLOC_73724	Dof	HvFRF20	1737	1757	+	10.9545	6.77e-05	0.089	ATTTTTGAGGAAAAGAAAAAT
MLOC_17236	Dof	HvFRF16	104	124	-	10.3485	6.88e-05	0.0582	CTAGTTTTTTTTTCTCTGATT
MLOC_73724	Dof	HvFRF4	1258	1278	-	10.9091	6.95e-05	0.0899	AGAGATAGACAAAAGGGAGAT
MLOC_17236	Dof	HvFRF21	1678	1698	-	10.2727	7.16e-05	0.0599	TTTATTTTTGTTGTATTTCCA
MLOC_64612	Dof	HvFRF14	754	767	+	11.3485	7.23e-05	0.146	CAAAAAGGCAAACC
MLOC_64612	Dof	HvFRF9	813	826	+	11.3485	7.23e-05	0.146	CAAAAAGGCAAACC
MLOC_61071	Dof	HvFRF16	1846	1856	-	11.7273	7.27e-05	0.266	GAAAAAGTTCA
MLOC_17236	Dof	HvFRF13	1563	1583	-	10.197	7.45e-05	0.0613	TATTTTTTTCATGTTTTTGTG
MLOC_17236	Dof	HvFRF14	550	570	-	10.1818	7.51e-05	0.0613	GATGCTTTTTTCTGTTGGTAT
MLOC_56598	Dof	HvFRF22	616	625	+	10.7091	7.55e-05	0.253	GAAAAAGCAT
MLOC_56598	Dof	HvFRF2	623	632	+	10.7091	7.55e-05	0.253	GAAAAAGCAT
MLOC_56598	Dof	HvFRF14	982	991	-	10.7091	7.55e-05	0.253	CATAAAGTGA
MLOC_64612	Dof	HvFRF8	384	397	+	11.2727	7.57e-05	0.146	AAAAAAGTTTTAGA
MLOC_17236	Dof	HvFRF3	1033	1053	-	10.1515	7.63e-05	0.0613	GTATCTTTTTCCTAACACTTC
MLOC_56598	Dof	HvFRF3	902	911	-	10.7	7.67e-05	0.253	GAAAAAGTAG
MLOC_61071	Dof	HvFRF20	1594	1604	+	11.6515	7.74e-05	0.266	AAAAAAGGTGA
MLOC_17236	Dof	HvFRF7	1051	1071	-	10.1212	7.75e-05	0.0613	CTGACTTTTTTTGTTCTGGGA
MLOC_17236	Dof	HvFRF5	1295	1315	-	10.1212	7.75e-05	0.0613	ATAGTTTTTTCAGTTTTTGTA
MLOC_73724	Dof	HvFRF22	415	435	-	10.6818	7.91e-05	0.0964	TTCAGACAGAAAAAGAAGGAA
MLOC_73724	Dof	HvFRF18	1414	1434	-	10.6515	8.04e-05	0.0964	CGGCTAACAAAAAAGGCAAAA
MLOC_56598	Dof	HvFRF16	541	550	+	10.5909	8.05e-05	0.255	AAAAAAGCTC
MLOC_17236	Dof	HvFRF1	513	533	-	10.0455	8.06e-05	0.0613	CTTGTTTTCTGTCTCTTCTTT
MLOC_17236	Dof	HvFRF3	541	561	-	10.0455	8.06e-05	0.0613	TAATCTTTTTATATATGCTTG
MLOC_17236	Dof	HvFRF5	1609	1629	-	10.0455	8.06e-05	0.0613	TTAGCATTTTGATTTTTTTGT
MLOC_64612	Dof	HvFRF14	935	948	+	11.1515	8.14e-05	0.146	AAAAAAGAAAACAA
MLOC_64612	Dof	HvFRF22	976	989	+	11.1515	8.14e-05	0.146	AAAAAAGAAAACAA
MLOC_64612	Dof	HvFRF9	996	1009	+	11.1515	8.14e-05	0.146	AAAAAAGAAAACAA
MLOC_64612	Dof	HvFRF1	1962	1975	+	11.1515	8.14e-05	0.146	AAAAAAGAAAACAA
MLOC_64612	Dof	HvFRF5	708	721	+	11.1364	8.21e-05	0.146	AAAAAAGGCAACAT
MLOC_17236	Dof	HvFRF1	323	343	-	10	8.25e-05	0.0613	TTTCGTTTTCACTTTTTTACT
MLOC_17236	Dof	HvFRF13	643	663	-	10	8.25e-05	0.0613	ATTACTTTCCTTCATTATTCA
MLOC_17236	Dof	HvFRF13	849	869	+	10	8.25e-05	0.0613	ACTCCTTTTTATGTATTGATT
MLOC_17236	Dof	HvFRF13	1040	1060	-	10	8.25e-05	0.0613	CTCCTTTTTTCTCCTTTCCTG
MLOC_73724	Dof	HvFRF11	176	196	-	10.6061	8.25e-05	0.0964	AAACAGCGGCAAAAGCAGAAC
MLOC_73724	Dof	HvFRF1	298	318	+	10.5909	8.32e-05	0.0964	AATGTCAAACAAAAGGAATAG
MLOC_73724	Dof	HvFRF11	1035	1055	+	10.5909	8.32e-05	0.0964	GCCAGAACAAAAAAGTCAGAA
MLOC_61071	Dof	HvFRF12	368	378	+	11.5606	8.34e-05	0.266	GGAAAAGGAAA
MLOC_73724	Dof	HvFRF6	884	904	+	10.5606	8.46e-05	0.0964	CAACTCAAAAAAAAGTTACTT
MLOC_17236	Dof	HvFRF7	355	375	+	9.93939	8.51e-05	0.0619	ACTTTTTTTATTTTATTTTGT
MLOC_56598	Dof	HvFRF8	9	18	+	10.5636	8.52e-05	0.261	GAAAAAGTTT
MLOC_73724	Dof	HvFRF18	852	872	-	10.5455	8.53e-05	0.0964	ATCTAGGGAAAAAAGTAACCT
MLOC_61071	Dof	HvFRF14	1474	1484	-	11.5152	8.64e-05	0.266	TATAAAGGGAC
MLOC_61071	Dof	HvFRF22	1537	1547	-	11.5152	8.64e-05	0.266	TATAAAGGGAC
MLOC_61071	Dof	HvFRF2	1539	1549	-	11.5152	8.64e-05	0.266	TATAAAGGGAC
MLOC_17236	Dof	HvFRF7	341	361	+	9.90909	8.64e-05	0.0619	TTGTTTCTTTTTTTACTTTTT
MLOC_17236	Dof	HvFRF5	544	564	-	9.90909	8.64e-05	0.0619	CCCCCTTTTGTATTCCTTGTT
MLOC_17236	Dof	HvFRF1	1799	1819	+	9.90909	8.64e-05	0.0619	CTCTCTTTTTCTTTGCACCTT
MLOC_17236	Dof	HvFRF17	1661	1681	+	9.89394	8.71e-05	0.0619	ATCGTTTTTTCCTTTTGCGTT
MLOC_73724	Dof	HvFRF5	283	303	+	10.5	8.75e-05	0.0964	AGGTCCAAGAAAAAGAAAGAT
MLOC_73724	Dof	HvFRF8	1	21	+	10.4848	8.82e-05	0.0964	ATATCTATGAAAAAGTTTATG
MLOC_73724	Dof	HvFRF12	361	381	+	10.4848	8.82e-05	0.0964	AAAATTGGGAAAAGGAAAAAA
MLOC_73724	Dof	HvFRF12	574	594	-	10.4848	8.82e-05	0.0964	AAAAAAGATTAAAAGTTGGTC
MLOC_17236	Dof	HvFRF6	1102	1122	-	9.86364	8.85e-05	0.0622	TTTCTTCTTTCTTTTCTCTCA
MLOC_73724	Dof	HvFRF6	1926	1946	-	10.4697	8.9e-05	0.0964	AGGACCTTAAAAAAGAAATAA
MLOC_17236	Dof	HvFRF12	279	299	+	9.84848	8.91e-05	0.0622	TTTACTTTCCGCTGTTATACT
MLOC_64612	Dof	HvFRF13	1758	1771	+	10.9848	8.97e-05	0.153	AAAAAAGCAAATTC
MLOC_61071	Dof	HvFRF20	1411	1421	-	11.4545	9.04e-05	0.266	AAAAAAGGAAT
MLOC_64612	Dof	HvFRF13	1749	1762	+	10.9697	9.07e-05	0.153	CCTAAAGTAAAAAA
MLOC_61071	Dof	HvFRF14	754	764	+	11.4394	9.19e-05	0.266	CAAAAAGGCAA
MLOC_61071	Dof	HvFRF22	795	805	+	11.4394	9.19e-05	0.266	CAAAAAGGCAA
MLOC_61071	Dof	HvFRF2	798	808	+	11.4394	9.19e-05	0.266	CAAAAAGGCAA
MLOC_61071	Dof	HvFRF9	813	823	+	11.4394	9.19e-05	0.266	CAAAAAGGCAA
MLOC_61071	Dof	HvFRF1	1783	1793	+	11.4394	9.19e-05	0.266	CAAAAAGGCAA
MLOC_17236	Dof	HvFRF22	727	747	-	9.78788	9.19e-05	0.063	GTTGTTTTTTTAATCATTTTC
MLOC_17236	Dof	HvFRF13	1061	1081	-	9.78788	9.19e-05	0.063	TATAATTTTTCATTTTTGTTC
MLOC_17236	Dof	HvFRF14	358	378	+	9.77273	9.26e-05	0.063	CCACCCTTTCCCTCTTTTTCT
MLOC_64612	Dof	HvFRF15	1096	1109	-	10.9242	9.31e-05	0.153	TAAAAAGGTCACAA
MLOC_64612	Dof	HvFRF4	375	388	-	10.9091	9.4e-05	0.153	CCAAAAGGAAATAT
MLOC_73724	Dof	HvFRF20	1880	1900	+	10.3636	9.43e-05	0.101	TTCACAACAAAAAAGTTGGAA
MLOC_61071	Dof	HvFRF4	1947	1957	+	11.4091	9.43e-05	0.266	AAAAAAGGAGA
MLOC_17236	Dof	HvFRF1	495	515	-	9.71212	9.55e-05	0.0643	TTTTTTTTACGGTTATTTTAT
MLOC_17236	Dof	HvFRF2	430	450	+	9.69697	9.63e-05	0.0643	CATCCTTTCCCTCTTTTTCTG
MLOC_61071	Dof	HvFRF21	1791	1801	-	11.3788	9.69e-05	0.266	GAAAAAGTTGG
MLOC_73724	Dof	HvFRF1	1879	1899	+	10.303	9.74e-05	0.103	TACAGAACAAAAAAGTCAGGA
MLOC_17236	Dof	HvFRF1	296	316	-	9.65152	9.85e-05	0.0647	ATTCCTTTTGTTTGACATTTT
MLOC_17236	Dof	HvFRF13	552	572	-	9.65152	9.85e-05	0.0647	GTCACTTTTCATCAGTTTCTT
MLOC_64612	Dof	HvFRF16	541	554	+	10.8182	9.91e-05	0.159	AAAAAAGCTCAAAA
MLOC_17236	Dof	HvFRF18	1319	1339	-	9.63636	9.93e-05	0.0647	TTCTCTTTCTTTTTATTAACC
MLOC_67050	E2F/DP	HvFRF14	1911	1931	+	6.82857	1.27e-05	0.611	CACACTGTGTTCCCGGCAAAC
MLOC_67050	E2F/DP	HvFRF4	1172	1192	+	5.14286	2.06e-05	0.611	TACGACAGCTTGGCGCCAAAT
MLOC_67050	E2F/DP	HvFRF1	651	671	+	4.98571	2.16e-05	0.611	CTTGACTCTTTGCCGCAAAAT
MLOC_67050	E2F/DP	HvFRF18	792	812	+	3.37143	3.36e-05	0.714	TGGGTTAGTTTCCCGCCTGAC
MLOC_67050	E2F/DP	HvFRF22	1589	1609	-	2.11429	4.68e-05	0.796	AAAAATTTTTTCCCCCCTGTA
MLOC_67050	E2F/DP	HvFRF17	835	855	-	0.0857143	7.85e-05	1	GCTTTGCTTGTCCCGCTCAAT
MLOC_67050	E2F/DP	HvFRF6	684	704	+	-0.842857	9.86e-05	1	ATCTTCCCTTTCCCGCCTCCT
MLOC_14619	EIL	HvFRF10	1241	1255	-	13.8283	7.39e-06	0.622	GTCAATGTACAATGA
MLOC_10823	EIL	HvFRF3	1351	1361	+	12.8889	2.22e-05	0.501	GCATGTATCTC
MLOC_10823	EIL	HvFRF3	1390	1400	+	12.8485	2.41e-05	0.501	TCATGTATCTG
MLOC_10823	EIL	HvFRF3	1047	1057	-	12.2626	4.49e-05	0.501	CCATGTATCTT
MLOC_10823	EIL	HvFRF12	1146	1156	+	11.7879	6.36e-05	0.501	AAATGTATCCG
MLOC_10823	EIL	HvFRF22	1900	1910	-	11.7677	6.46e-05	0.501	TGATGTACCGA
MLOC_10823	EIL	HvFRF14	1900	1910	-	11.7677	6.46e-05	0.501	TGATGTACCGA
MLOC_10823	EIL	HvFRF2	1900	1910	-	11.7677	6.46e-05	0.501	TGATGTACCGA
MLOC_10823	EIL	HvFRF9	1900	1910	-	11.697	6.82e-05	0.501	TGATGTATCGA
MLOC_10823	EIL	HvFRF20	1200	1210	+	11.6768	6.97e-05	0.501	AAATGAATCTT
MLOC_10823	EIL	HvFRF21	1483	1493	+	11.5556	7.54e-05	0.501	AAATGTATCCA
MLOC_10823	EIL	HvFRF17	406	416	+	11.5152	7.69e-05	0.501	GGATGAATCTT
MLOC_10823	EIL	HvFRF10	1327	1337	+	11.5152	7.69e-05	0.501	GGATGAATCTT
MLOC_10823	EIL	HvFRF12	1904	1914	+	11.5152	7.69e-05	0.501	GGATGAATCTT
MLOC_14619	EIL	HvFRF8	1209	1223	-	10.7273	7.85e-05	1	GAATAGATTCAGTTT
MLOC_14619	EIL	HvFRF18	511	525	-	10.6364	8.35e-05	1	GAACACGTACAACGA
MLOC_14619	EIL	HvFRF16	388	402	+	10.5859	8.64e-05	1	GACTATATTCATATA
MLOC_14619	EIL	HvFRF21	1108	1122	+	10.404	9.69e-05	1	GACTTGATGCAGTGC
MLOC_77405	ERF	HvFRF10	949	969	-	22.6761	8.36e-09	0.000724	GGCGCCGGGGACGGCGGTGGA
MLOC_55144	ERF	HvFRF17	102	121	+	21.197	1.51e-08	0.000654	CGTCGCCTCCACCGCCGACA
MLOC_55144	ERF	HvFRF10	1022	1041	+	21.197	1.51e-08	0.000654	CGTCGCCTCCACCGCCGACA
MLOC_69987	ERF	HvFRF17	141	155	+	21.3485	2.15e-08	0.00188	TCTCCGCCGCCGCCG
MLOC_69438	ERF	HvFRF17	141	155	+	20.4394	3.18e-08	0.00277	TCTCCGCCGCCGCCG
MLOC_63834	ERF	HvFRF17	98	117	-	18.6515	5.01e-08	0.00238	GGCGGTGGAGGCGACGTCTG
MLOC_58641	ERF	HvFRF17	1537	1557	-	20.3571	7.51e-08	0.00345	CCTCAACCGCCACCACTGCCG
MLOC_58641	ERF	HvFRF10	950	970	+	20.2857	7.96e-08	0.00345	CCACCGCCGTCCCCGGCGCCG
MLOC_73522	ERF	HvFRF10	949	969	+	19.803	8.42e-08	0.00731	TCCACCGCCGTCCCCGGCGCC
MLOC_80197	ERF	HvFRF17	138	165	+	19.6667	8.42e-08	0.0073	TCGTCTCCGCCGCCGCCGGTACGTCACC
MLOC_63834	ERF	HvFRF10	1018	1037	-	18.1818	1e-07	0.00238	GGCGGTGGAGGCGACGTGTG
MLOC_63834	ERF	HvFRF17	101	120	-	18.1212	1.09e-07	0.00238	GTCGGCGGTGGAGGCGACGT
MLOC_63834	ERF	HvFRF10	1021	1040	-	18.1212	1.09e-07	0.00238	GTCGGCGGTGGAGGCGACGT
MLOC_77405	ERF	HvFRF17	17	37	-	19.507	1.36e-07	0.00589	GGCTCCGGGGACGGCGGTGGA
MLOC_58641	ERF	HvFRF17	141	161	+	19.3857	1.63e-07	0.00417	TCTCCGCCGCCGCCGGTACGT
MLOC_55144	ERF	HvFRF17	99	118	+	18.7273	1.71e-07	0.00393	AGACGTCGCCTCCACCGCCG
MLOC_63834	ERF	HvFRF10	953	972	-	17.7273	1.88e-07	0.00327	GTCGGCGCCGGGGACGGCGG
MLOC_58641	ERF	HvFRF17	18	38	+	19.1714	1.93e-07	0.00417	CCACCGCCGTCCCCGGAGCCG
MLOC_55144	ERF	HvFRF21	872	891	-	18.5606	1.98e-07	0.00393	CTGCGACGCCACCGCCGACG
MLOC_80197	ERF	HvFRF10	913	940	+	18.9545	2e-07	0.00866	CCGACTCCGCCGCCGCGACTTCGCCGCC
MLOC_69438	ERF	HvFRF10	913	927	+	18.6212	2.4e-07	0.00751	CCGACTCCGCCGCCG
MLOC_69987	ERF	HvFRF8	79	93	+	18.6364	2.5e-07	0.00714	TCACAGCCGCCGCCG
MLOC_69438	ERF	HvFRF17	138	152	+	18.5455	2.59e-07	0.00751	TCGTCTCCGCCGCCG
MLOC_55144	ERF	HvFRF17	136	155	+	18.1364	2.88e-07	0.00393	TCTCGTCTCCGCCGCCGCCG
MLOC_73522	ERF	HvFRF17	17	37	+	18.3788	3.16e-07	0.0137	TCCACCGCCGTCCCCGGAGCC
MLOC_69987	ERF	HvFRF10	913	927	+	18.3485	3.25e-07	0.00714	CCGACTCCGCCGCCG
MLOC_63834	ERF	HvFRF10	907	926	-	17.303	3.26e-07	0.00473	GGCGGCGGAGTCGGGCGTGA
MLOC_69987	ERF	HvFRF17	138	152	+	18.3333	3.28e-07	0.00714	TCGTCTCCGCCGCCG
MLOC_24530	ERF	HvFRF17	141	155	+	18.5	3.43e-07	0.0205	TCTCCGCCGCCGCCG
MLOC_55144	ERF	HvFRF10	1019	1038	+	17.9242	3.45e-07	0.00393	ACACGTCGCCTCCACCGCCG
MLOC_69002	ERF	HvFRF16	768	782	+	16.8485	3.57e-07	0.0279	CATCCGCCGCCGGCA
MLOC_55323	ERF	HvFRF17	14	32	-	18.1515	3.61e-07	0.0157	CGGGGACGGCGGTGGAGAC
MLOC_55323	ERF	HvFRF10	946	964	-	18.1515	3.61e-07	0.0157	CGGGGACGGCGGTGGAGAC
MLOC_55144	ERF	HvFRF17	7	26	+	17.8636	3.63e-07	0.00393	CCGCGACGTCTCCACCGCCG
MLOC_55144	ERF	HvFRF10	939	958	+	17.8636	3.63e-07	0.00393	CCGCGACGTCTCCACCGCCG
MLOC_58641	ERF	HvFRF8	82	102	+	18.1857	4e-07	0.00627	CAGCCGCCGCCGCTCTCGCGA
MLOC_58641	ERF	HvFRF10	947	967	+	18.0714	4.34e-07	0.00627	TCTCCACCGCCGTCCCCGGCG
MLOC_24530	ERF	HvFRF17	1234	1248	+	18.1818	4.7e-07	0.0205	GCGCCGCCGCCATTC
MLOC_63834	ERF	HvFRF17	6	25	-	16.9848	4.83e-07	0.00526	GGCGGTGGAGACGTCGCGGC
MLOC_63834	ERF	HvFRF10	938	957	-	16.9848	4.83e-07	0.00526	GGCGGTGGAGACGTCGCGGC
MLOC_77405	ERF	HvFRF6	56	76	-	17.7324	5.18e-07	0.0149	GGACGTGGCTATGGTGGTGGA
MLOC_55144	ERF	HvFRF10	951	970	+	17.4242	5.26e-07	0.00505	CACCGCCGTCCCCGGCGCCG
MLOC_73522	ERF	HvFRF17	143	163	+	17.7727	5.27e-07	0.0153	TCCGCCGCCGCCGGTACGTCA
MLOC_58641	ERF	HvFRF10	916	936	+	17.7429	5.48e-07	0.00678	ACTCCGCCGCCGCGACTTCGC
MLOC_55144	ERF	HvFRF10	1056	1075	+	17.2727	5.95e-07	0.00515	CCTCGTCTCCGCTGCCGCCG
MLOC_12223	ERF	HvFRF17	17	31	-	17.4848	5.96e-07	0.026	GGGGACGGCGGTGGA
MLOC_12223	ERF	HvFRF10	949	963	-	17.4848	5.96e-07	0.026	GGGGACGGCGGTGGA
MLOC_69002	ERF	HvFRF17	210	224	-	16.4394	6.41e-07	0.0279	CTGCAACCGCCGGCG
MLOC_38561	ERF	HvFRF8	82	102	-	17.5606	6.79e-07	0.0419	TCGCGAGAGCGGCGGCGGCTG
MLOC_69438	ERF	HvFRF10	916	930	+	17.4697	7e-07	0.0103	ACTCCGCCGCCGCGA
MLOC_69438	ERF	HvFRF8	79	93	+	17.4545	7.12e-07	0.0103	TCACAGCCGCCGCCG
MLOC_69438	ERF	HvFRF16	1695	1709	+	17.4545	7.12e-07	0.0103	GGGCCGCCGCCGCCA
MLOC_55323	ERF	HvFRF10	949	967	-	17.3182	7.32e-07	0.0163	CGCCGGGGACGGCGGTGGA
MLOC_55323	ERF	HvFRF17	140	158	-	17.2879	7.5e-07	0.0163	TACCGGCGGCGGCGGAGAC
MLOC_24530	ERF	HvFRF16	1698	1712	+	17.6667	7.54e-07	0.0219	CCGCCGCCGCCAGAG
MLOC_69987	ERF	HvFRF17	104	118	+	17.0758	8.62e-07	0.0125	TCGCCTCCACCGCCG
MLOC_69987	ERF	HvFRF10	1024	1038	+	17.0758	8.62e-07	0.0125	TCGCCTCCACCGCCG
MLOC_69002	ERF	HvFRF17	141	155	+	16.1364	9.58e-07	0.0279	TCTCCGCCGCCGCCG
MLOC_73522	ERF	HvFRF17	140	160	+	17	9.75e-07	0.0173	GTCTCCGCCGCCGCCGGTACG
MLOC_73522	ERF	HvFRF8	81	101	+	16.9697	9.98e-07	0.0173	ACAGCCGCCGCCGCTCTCGCG
MLOC_80197	ERF	HvFRF8	76	103	+	17.3485	1.01e-06	0.0215	TGCTCACAGCCGCCGCCGCTCTCGCGAT
MLOC_55144	ERF	HvFRF17	1537	1556	-	16.5606	1.06e-06	0.00828	CTCAACCGCCACCACTGCCG
MLOC_69438	ERF	HvFRF8	82	96	+	16.9394	1.08e-06	0.0133	CAGCCGCCGCCGCTC
MLOC_63834	ERF	HvFRF17	65	84	-	16.2727	1.1e-06	0.00911	GTCGGCGGAAGACGTGCCGG
MLOC_24530	ERF	HvFRF17	144	158	+	17.1818	1.1e-06	0.0239	CCGCCGCCGCCGGTA
MLOC_58641	ERF	HvFRF10	913	933	+	16.7	1.11e-06	0.0112	CCGACTCCGCCGCCGCGACTT
MLOC_69987	ERF	HvFRF10	1127	1141	-	16.7424	1.14e-06	0.0131	CAACCGCCGGCGCCG
MLOC_55144	ERF	HvFRF10	954	973	+	16.4545	1.15e-06	0.00828	CGCCGTCCCCGGCGCCGACG
MLOC_63834	ERF	HvFRF17	9	28	-	16.2273	1.15e-06	0.00911	GACGGCGGTGGAGACGTCGC
MLOC_63834	ERF	HvFRF10	941	960	-	16.2273	1.15e-06	0.00911	GACGGCGGTGGAGACGTCGC
MLOC_3095	ERF	HvFRF21	941	955	+	16.4545	1.16e-06	0.101	AAGTGTCGGTGCAGT
MLOC_58641	ERF	HvFRF8	79	99	+	16.6286	1.16e-06	0.0112	TCACAGCCGCCGCCGCTCTCG
MLOC_73522	ERF	HvFRF16	1697	1717	+	16.6212	1.3e-06	0.0178	GCCGCCGCCGCCAGAGGAGAG
MLOC_63834	ERF	HvFRF17	135	154	-	16.1061	1.31e-06	0.00952	GGCGGCGGCGGAGACGAGAC
MLOC_80197	ERF	HvFRF10	927	954	+	17.0303	1.33e-06	0.0215	GCGACTTCGCCGCCGCGACGTCTCCACC
MLOC_38561	ERF	HvFRF17	141	161	-	16.7273	1.33e-06	0.0419	ACGTACCGGCGGCGGCGGAGA
MLOC_69438	ERF	HvFRF5	878	892	+	16.6515	1.36e-06	0.0133	TCCCAGCCGCCGCCA
MLOC_69987	ERF	HvFRF10	916	930	+	16.4848	1.37e-06	0.0131	ACTCCGCCGCCGCGA
MLOC_69002	ERF	HvFRF17	138	152	+	15.8182	1.41e-06	0.0304	TCGTCTCCGCCGCCG
MLOC_73522	ERF	HvFRF17	1554	1574	-	16.4848	1.44e-06	0.0178	CTCGCCGCCGCGGCCGACCTC
MLOC_38561	ERF	HvFRF17	144	164	-	16.6212	1.44e-06	0.0419	GTGACGTACCGGCGGCGGCGG
MLOC_55144	ERF	HvFRF6	226	245	-	16.1515	1.45e-06	0.00966	CGGCGACATCTTCGCCGTCA
MLOC_69987	ERF	HvFRF5	878	892	+	16.4091	1.46e-06	0.0131	TCCCAGCCGCCGCCA
MLOC_55323	ERF	HvFRF17	143	161	-	16.4091	1.48e-06	0.022	ACGTACCGGCGGCGGCGGA
MLOC_55323	ERF	HvFRF8	81	99	-	16.3788	1.52e-06	0.022	CGAGAGCGGCGGCGGCTGT
MLOC_69987	ERF	HvFRF17	144	158	+	16.3182	1.56e-06	0.0131	CCGCCGCCGCCGGTA
MLOC_63834	ERF	HvFRF21	873	892	+	15.9242	1.59e-06	0.0106	GTCGGCGGTGGCGTCGCAGC
MLOC_69438	ERF	HvFRF17	1231	1245	+	16.4242	1.63e-06	0.0133	GCCGCGCCGCCGCCA
MLOC_69987	ERF	HvFRF16	768	782	+	16.2424	1.65e-06	0.0131	CATCCGCCGCCGGCA
MLOC_69438	ERF	HvFRF17	104	118	+	16.3788	1.68e-06	0.0133	TCGCCTCCACCGCCG
MLOC_69438	ERF	HvFRF10	1024	1038	+	16.3788	1.68e-06	0.0133	TCGCCTCCACCGCCG
MLOC_77405	ERF	HvFRF17	1535	1555	+	16	1.69e-06	0.0365	ATCGGCAGTGGTGGCGGTTGA
MLOC_69002	ERF	HvFRF10	913	927	+	15.6515	1.74e-06	0.0304	CCGACTCCGCCGCCG
MLOC_73522	ERF	HvFRF3	1749	1769	-	16.2121	1.75e-06	0.019	GCCGTCGCCGCTGCTTCCGTG
MLOC_58641	ERF	HvFRF17	144	164	+	15.8714	1.89e-06	0.0164	CCGCCGCCGCCGGTACGTCAC
MLOC_80197	ERF	HvFRF5	875	902	+	16.5909	1.9e-06	0.0215	CTCTCCCAGCCGCCGCCAGAGGCCATGA
MLOC_80197	ERF	HvFRF8	79	106	+	16.5758	1.92e-06	0.0215	TCACAGCCGCCGCCGCTCTCGCGATACT
MLOC_55144	ERF	HvFRF7	667	686	+	15.7727	1.94e-06	0.012	CCCCACCCCCACCACCGTAA
MLOC_55323	ERF	HvFRF21	236	254	-	16.0455	1.94e-06	0.0241	ATGATGATGCGGTGGAGAA
MLOC_80197	ERF	HvFRF17	1567	1594	-	16.5455	1.96e-06	0.0215	CCCAGGCCGCCGCCACACCACTCGCCGC
MLOC_81350	ERF	HvFRF10	222	238	-	16.6061	1.98e-06	0.173	ATAGGTCGGTGACGGTG
MLOC_80197	ERF	HvFRF17	1552	1579	-	16.5303	1.99e-06	0.0215	CACCACTCGCCGCCGCGGCCGACCTCAA
MLOC_24530	ERF	HvFRF8	82	96	+	16.3939	2.02e-06	0.0352	CAGCCGCCGCCGCTC
MLOC_69987	ERF	HvFRF17	1231	1245	+	15.9545	2.02e-06	0.0147	GCCGCGCCGCCGCCA
MLOC_73522	ERF	HvFRF10	918	938	+	15.8939	2.2e-06	0.0195	TCCGCCGCCGCGACTTCGCCG
MLOC_12223	ERF	HvFRF21	870	884	+	15.9091	2.3e-06	0.0644	AGCGTCGGCGGTGGC
MLOC_38561	ERF	HvFRF8	79	99	-	15.9545	2.36e-06	0.0508	CGAGAGCGGCGGCGGCTGTGA
MLOC_8220	ERF	HvFRF22	1931	1940	+	12.899	2.38e-06	0.104	CACCGACCAA
MLOC_8220	ERF	HvFRF2	1931	1940	+	12.899	2.38e-06	0.104	CACCGACCAA
MLOC_69438	ERF	HvFRF10	930	944	+	15.8788	2.44e-06	0.0177	ACTTCGCCGCCGCGA
MLOC_73522	ERF	HvFRF10	946	966	+	15.7424	2.45e-06	0.0195	GTCTCCACCGCCGTCCCCGGC
MLOC_58641	ERF	HvFRF17	138	158	+	15.4429	2.46e-06	0.0194	TCGTCTCCGCCGCCGCCGGTA
MLOC_73522	ERF	HvFRF10	1077	1097	+	15.7273	2.47e-06	0.0195	TACGCCGCCGCACATGTCTCC
MLOC_69987	ERF	HvFRF16	1695	1709	+	15.6212	2.52e-06	0.0169	GGGCCGCCGCCGCCA
MLOC_80197	ERF	HvFRF17	141	168	+	16.0909	2.76e-06	0.0265	TCTCCGCCGCCGCCGGTACGTCACCGCA
MLOC_69002	ERF	HvFRF17	15	29	+	15.197	2.89e-06	0.036	TCTCCACCGCCGTCC
MLOC_69002	ERF	HvFRF10	947	961	+	15.197	2.89e-06	0.036	TCTCCACCGCCGTCC
MLOC_63834	ERF	HvFRF21	876	895	+	15.3182	2.92e-06	0.0182	GGCGGTGGCGTCGCAGCAGC
MLOC_69438	ERF	HvFRF17	144	158	+	15.5303	3.11e-06	0.0209	CCGCCGCCGCCGGTA
MLOC_55323	ERF	HvFRF17	1540	1558	+	15.3636	3.16e-06	0.0274	CAGTGGTGGCGGTTGAGGT
MLOC_55144	ERF	HvFRF17	139	158	+	15.0758	3.24e-06	0.0187	CGTCTCCGCCGCCGCCGGTA
MLOC_55323	ERF	HvFRF17	1537	1555	+	15.2879	3.33e-06	0.0274	CGGCAGTGGTGGCGGTTGA
MLOC_73522	ERF	HvFRF10	915	935	+	15.2879	3.34e-06	0.0242	GACTCCGCCGCCGCGACTTCG
MLOC_58641	ERF	HvFRF21	869	889	-	14.8857	3.44e-06	0.0249	GCGACGCCACCGCCGACGCTT
MLOC_12223	ERF	HvFRF10	918	932	-	15.3788	3.47e-06	0.0644	AGTCGCGGCGGCGGA
MLOC_55323	ERF	HvFRF21	866	884	+	15.2121	3.51e-06	0.0274	ATGAAGCGTCGGCGGTGGC
MLOC_55144	ERF	HvFRF21	875	894	-	14.9242	3.62e-06	0.0196	CTGCTGCGACGCCACCGCCG
MLOC_55323	ERF	HvFRF17	17	35	-	15.1212	3.73e-06	0.0274	CTCCGGGGACGGCGGTGGA
MLOC_55323	ERF	HvFRF3	1751	1769	+	15.1061	3.77e-06	0.0274	CGGAAGCAGCGGCGACGGC
MLOC_63834	ERF	HvFRF17	132	151	-	15.0455	3.78e-06	0.0206	GGCGGCGGAGACGAGACGGT
MLOC_63834	ERF	HvFRF6	227	246	+	15.0455	3.78e-06	0.0206	GACGGCGAAGATGTCGCCGG
MLOC_69987	ERF	HvFRF8	82	96	+	15.0152	3.8e-06	0.0223	CAGCCGCCGCCGCTC
MLOC_69987	ERF	HvFRF17	207	221	-	15	3.84e-06	0.0223	CAACCGCCGGCGTCG
MLOC_38561	ERF	HvFRF10	947	967	-	15.197	3.96e-06	0.0508	CGCCGGGGACGGCGGTGGAGA
MLOC_38561	ERF	HvFRF17	1234	1254	-	15.197	3.96e-06	0.0508	GATGCAGAATGGCGGCGGCGC
MLOC_12223	ERF	HvFRF17	143	157	-	15.197	3.97e-06	0.0644	ACCGGCGGCGGCGGA
MLOC_77405	ERF	HvFRF17	140	160	-	14.6056	4.03e-06	0.0379	CGTACCGGCGGCGGCGGAGAC
MLOC_69002	ERF	HvFRF10	1130	1144	-	14.8485	4.15e-06	0.0435	TTGCAACCGCCGGCG
MLOC_77405	ERF	HvFRF19	1302	1322	-	14.5211	4.24e-06	0.0379	GATGGTGGTGGTTTAGGTGGA
MLOC_58641	ERF	HvFRF17	15	35	+	14.5286	4.25e-06	0.0283	TCTCCACCGCCGTCCCCGGAG
MLOC_38561	ERF	HvFRF17	1537	1557	+	15.0758	4.28e-06	0.0508	CGGCAGTGGTGGCGGTTGAGG
MLOC_69438	ERF	HvFRF17	1562	1576	-	15.0152	4.42e-06	0.0266	CACTCGCCGCCGCGG
MLOC_69002	ERF	HvFRF10	1123	1137	+	14.7727	4.48e-06	0.0435	GCTTCGGCGCCGGCG
MLOC_69438	ERF	HvFRF16	765	779	+	14.9697	4.58e-06	0.0266	CACCATCCGCCGCCG
MLOC_55323	ERF	HvFRF16	1697	1715	-	14.803	4.62e-06	0.0309	CTCCTCTGGCGGCGGCGGC
MLOC_81350	ERF	HvFRF21	941	957	+	15.6818	4.64e-06	0.202	AAGTGTCGGTGCAGTGT
MLOC_24530	ERF	HvFRF5	881	895	+	15.1212	4.64e-06	0.0584	CAGCCGCCGCCAGAG
MLOC_38561	ERF	HvFRF17	1571	1591	+	14.9394	4.68e-06	0.0508	CGAGTGGTGTGGCGGCGGCCT
MLOC_24530	ERF	HvFRF10	916	930	+	15.1061	4.69e-06	0.0584	ACTCCGCCGCCGCGA
MLOC_69987	ERF	HvFRF17	1543	1557	-	14.6818	4.69e-06	0.0243	CCTCAACCGCCACCA
MLOC_69987	ERF	HvFRF10	930	944	+	14.6667	4.75e-06	0.0243	ACTTCGCCGCCGCGA
MLOC_55144	ERF	HvFRF10	948	967	+	14.5303	4.79e-06	0.0244	CTCCACCGCCGTCCCCGGCG
MLOC_12223	ERF	HvFRF10	1049	1063	-	14.8939	4.95e-06	0.0644	AGACGAGGCGGTGGG
MLOC_77405	ERF	HvFRF10	952	972	-	14.2254	5.06e-06	0.0379	GTCGGCGCCGGGGACGGCGGT
MLOC_77405	ERF	HvFRF17	109	129	-	14.1972	5.14e-06	0.0379	GGGTGTCCTGTCGGCGGTGGA
MLOC_77405	ERF	HvFRF10	1029	1049	-	14.1972	5.14e-06	0.0379	GGGTGTCCTGTCGGCGGTGGA
MLOC_55323	ERF	HvFRF21	869	887	+	14.6364	5.15e-06	0.0315	AAGCGTCGGCGGTGGCGTC
MLOC_12223	ERF	HvFRF16	1697	1711	-	14.8333	5.17e-06	0.0644	TCTGGCGGCGGCGGC
MLOC_75886	ERF	HvFRF18	75	84	+	14.7071	5.18e-06	0.417	ATGCCGACAC
MLOC_38561	ERF	HvFRF10	916	936	-	14.7273	5.35e-06	0.0517	GCGAAGTCGCGGCGGCGGAGT
MLOC_77405	ERF	HvFRF17	97	117	-	14.1127	5.41e-06	0.0379	GGCGGTGGAGGCGACGTCTGC
MLOC_63834	ERF	HvFRF5	872	891	-	14.6364	5.48e-06	0.028	GGCGGCGGCTGGGAGAGGGA
MLOC_77405	ERF	HvFRF20	1459	1479	-	14.0845	5.5e-06	0.0379	GTTTGTGGGATTGGTGGTGGT
MLOC_73522	ERF	HvFRF17	1569	1589	-	14.4697	5.69e-06	0.038	GCCGCCGCCACACCACTCGCC
MLOC_55323	ERF	HvFRF17	106	124	-	14.4545	5.8e-06	0.0315	TCCTGTCGGCGGTGGAGGC
MLOC_55323	ERF	HvFRF10	1026	1044	-	14.4545	5.8e-06	0.0315	TCCTGTCGGCGGTGGAGGC
MLOC_69987	ERF	HvFRF16	765	779	+	14.3485	5.82e-06	0.0258	CACCATCCGCCGCCG
MLOC_69987	ERF	HvFRF17	12	26	+	14.3182	5.92e-06	0.0258	ACGTCTCCACCGCCG
MLOC_69987	ERF	HvFRF10	944	958	+	14.3182	5.92e-06	0.0258	ACGTCTCCACCGCCG
MLOC_58641	ERF	HvFRF17	1534	1554	-	13.9	6.07e-06	0.0356	CAACCGCCACCACTGCCGATC
MLOC_55144	ERF	HvFRF17	10	29	+	14.1818	6.1e-06	0.0278	CGACGTCTCCACCGCCGTCC
MLOC_55144	ERF	HvFRF10	942	961	+	14.1818	6.1e-06	0.0278	CGACGTCTCCACCGCCGTCC
MLOC_55323	ERF	HvFRF10	918	936	-	14.3636	6.15e-06	0.0315	GCGAAGTCGCGGCGGCGGA
MLOC_58641	ERF	HvFRF16	768	788	+	13.8714	6.17e-06	0.0356	CATCCGCCGCCGGCACGTTGC
MLOC_77405	ERF	HvFRF7	674	694	-	13.831	6.37e-06	0.0379	AGAAGAGATTACGGTGGTGGG
MLOC_77405	ERF	HvFRF6	59	79	-	13.7746	6.58e-06	0.0379	GGTGGACGTGGCTATGGTGGT
MLOC_73522	ERF	HvFRF10	932	952	+	14.2273	6.62e-06	0.0411	TTCGCCGCCGCGACGTCTCCA
MLOC_12223	ERF	HvFRF17	1575	1589	+	14.4545	6.72e-06	0.0724	TGGTGTGGCGGCGGC
MLOC_69438	ERF	HvFRF17	15	29	+	14.3333	6.88e-06	0.0353	TCTCCACCGCCGTCC
MLOC_69438	ERF	HvFRF10	947	961	+	14.3333	6.88e-06	0.0353	TCTCCACCGCCGTCC
MLOC_80197	ERF	HvFRF16	765	792	+	14.6364	6.92e-06	0.06	CACCATCCGCCGCCGGCACGTTGCTGCG
MLOC_77405	ERF	HvFRF2	489	509	-	13.662	7.02e-06	0.0379	GGGGTTGGGATTGGTGGTGGG
MLOC_77405	ERF	HvFRF1	1457	1477	-	13.662	7.02e-06	0.0379	GGGGTTGGGATTGGTGGTGGG
MLOC_24530	ERF	HvFRF16	768	782	+	14.4091	7.03e-06	0.0767	CATCCGCCGCCGGCA
MLOC_55144	ERF	HvFRF17	207	226	-	13.9697	7.06e-06	0.0303	CACTGCAACCGCCGGCGTCG
MLOC_58641	ERF	HvFRF17	1556	1576	-	13.5857	7.23e-06	0.0385	CACTCGCCGCCGCGGCCGACC
MLOC_77405	ERF	HvFRF17	1569	1589	+	13.5915	7.31e-06	0.0379	GGCGAGTGGTGTGGCGGCGGC
MLOC_55144	ERF	HvFRF19	1301	1320	+	13.9091	7.36e-06	0.0303	TTCCACCTAAACCACCACCA
MLOC_63834	ERF	HvFRF17	164	183	-	14.2879	7.39e-06	0.0347	GCCGGTGGAGACGTGTGCGG
MLOC_77405	ERF	HvFRF16	1557	1577	+	13.5634	7.43e-06	0.0379	GGGGCCGCCGTCGGAGGAGGA
MLOC_69002	ERF	HvFRF17	144	158	+	14.2424	7.44e-06	0.06	CCGCCGCCGCCGGTA
MLOC_12223	ERF	HvFRF6	56	70	-	14.303	7.48e-06	0.0724	GGCTATGGTGGTGGA
MLOC_69002	ERF	HvFRF16	1695	1709	+	14.2273	7.55e-06	0.06	GGGCCGCCGCCGCCA
MLOC_63834	ERF	HvFRF17	21	40	-	14.2121	7.87e-06	0.0347	GTCGGCTCCGGGGACGGCGG
MLOC_58641	ERF	HvFRF21	866	886	-	13.4143	7.94e-06	0.0385	ACGCCACCGCCGACGCTTCAT
MLOC_55323	ERF	HvFRF10	915	933	-	13.9545	7.97e-06	0.0385	AAGTCGCGGCGGCGGAGTC
MLOC_63834	ERF	HvFRF10	215	234	-	14.197	7.97e-06	0.0347	GTCGGTGACGGTGAGGTTTA
MLOC_69438	ERF	HvFRF16	768	782	+	14.0909	7.99e-06	0.0387	CATCCGCCGCCGGCA
MLOC_58641	ERF	HvFRF10	930	950	+	13.4	8e-06	0.0385	ACTTCGCCGCCGCGACGTCTC
MLOC_3095	ERF	HvFRF21	869	883	+	14.4848	8.39e-06	0.245	AAGCGTCGGCGGTGG
MLOC_69987	ERF	HvFRF17	74	88	+	13.7576	8.39e-06	0.0315	CTTCCGCCGACGCCG
MLOC_73522	ERF	HvFRF21	864	884	-	13.803	8.59e-06	0.0439	GCCACCGCCGACGCTTCATCG
MLOC_73522	ERF	HvFRF21	867	887	-	13.803	8.59e-06	0.0439	GACGCCACCGCCGACGCTTCA
MLOC_12223	ERF	HvFRF3	1784	1798	+	14.0909	8.59e-06	0.0742	CATGGAAGCGGCGGC
MLOC_55323	ERF	HvFRF8	84	102	-	13.8182	8.68e-06	0.0398	TCGCGAGAGCGGCGGCGGC
MLOC_69987	ERF	HvFRF21	875	889	-	13.697	8.73e-06	0.0315	GCGACGCCACCGCCG
MLOC_77405	ERF	HvFRF10	946	966	-	13.2676	8.78e-06	0.0421	GCCGGGGACGGCGGTGGAGAC
MLOC_55144	ERF	HvFRF19	1304	1323	+	13.6061	9.03e-06	0.0355	CACCTAAACCACCACCATCT
MLOC_69987	ERF	HvFRF17	1562	1576	-	13.6364	9.06e-06	0.0315	CACTCGCCGCCGCGG
MLOC_58641	ERF	HvFRF5	878	898	+	13.1571	9.12e-06	0.0416	TCCCAGCCGCCGCCAGAGGCC
MLOC_63834	ERF	HvFRF16	1467	1486	+	14.0303	9.14e-06	0.0379	GCCGGTGGAGAGGAGGGGCG
MLOC_66843	ERF	HvFRF17	2	9	+	15	9.14e-06	0.0533	CGCCGCCG
MLOC_66843	ERF	HvFRF8	86	93	+	15	9.14e-06	0.0533	CGCCGCCG
MLOC_66843	ERF	HvFRF17	145	152	+	15	9.14e-06	0.0533	CGCCGCCG
MLOC_66843	ERF	HvFRF17	148	155	+	15	9.14e-06	0.0533	CGCCGCCG
MLOC_66843	ERF	HvFRF16	772	779	+	15	9.14e-06	0.0533	CGCCGCCG
MLOC_66843	ERF	HvFRF21	811	818	-	15	9.14e-06	0.0533	CGCCGCCG
MLOC_66843	ERF	HvFRF10	920	927	+	15	9.14e-06	0.0533	CGCCGCCG
MLOC_66843	ERF	HvFRF10	934	941	+	15	9.14e-06	0.0533	CGCCGCCG
MLOC_66843	ERF	HvFRF10	1079	1086	+	15	9.14e-06	0.0533	CGCCGCCG
MLOC_66843	ERF	HvFRF17	1235	1242	+	15	9.14e-06	0.0533	CGCCGCCG
MLOC_66843	ERF	HvFRF20	1326	1333	-	15	9.14e-06	0.0533	CGCCGCCG
MLOC_66843	ERF	HvFRF16	1384	1391	+	15	9.14e-06	0.0533	CGCCGCCG
MLOC_66843	ERF	HvFRF17	1565	1572	-	15	9.14e-06	0.0533	CGCCGCCG
MLOC_66843	ERF	HvFRF16	1673	1680	+	15	9.14e-06	0.0533	CGCCGCCG
MLOC_66843	ERF	HvFRF16	1699	1706	+	15	9.14e-06	0.0533	CGCCGCCG
MLOC_64636	ERF	HvFRF17	1234	1241	+	13.9909	9.14e-06	0.0808	GCGCCGCC
MLOC_64636	ERF	HvFRF20	1327	1334	-	13.9909	9.14e-06	0.0808	GCGCCGCC
MLOC_73522	ERF	HvFRF8	84	104	+	13.697	9.15e-06	0.0439	GCCGCCGCCGCTCTCGCGATA
MLOC_69438	ERF	HvFRF17	12	26	+	13.8333	9.33e-06	0.0406	ACGTCTCCACCGCCG
MLOC_69438	ERF	HvFRF10	944	958	+	13.8333	9.33e-06	0.0406	ACGTCTCCACCGCCG
MLOC_77405	ERF	HvFRF21	864	884	+	13.1549	9.35e-06	0.0421	CGATGAAGCGTCGGCGGTGGC
MLOC_73522	ERF	HvFRF17	1535	1555	-	13.6364	9.49e-06	0.0439	TCAACCGCCACCACTGCCGAT
MLOC_69987	ERF	HvFRF17	15	29	+	13.5606	9.49e-06	0.0315	TCTCCACCGCCGTCC
MLOC_69987	ERF	HvFRF10	947	961	+	13.5606	9.49e-06	0.0315	TCTCCACCGCCGTCC
MLOC_77405	ERF	HvFRF16	1554	1574	+	13.0845	9.73e-06	0.0421	GGAGGGGCCGCCGTCGGAGGA
MLOC_69987	ERF	HvFRF17	107	121	+	13.5152	9.75e-06	0.0315	CCTCCACCGCCGACA
MLOC_69987	ERF	HvFRF10	1027	1041	+	13.5152	9.75e-06	0.0315	CCTCCACCGCCGACA
MLOC_80197	ERF	HvFRF5	878	905	+	13.9697	9.81e-06	0.0758	TCCCAGCCGCCGCCAGAGGCCATGACCT
MLOC_38561	ERF	HvFRF17	15	35	-	13.697	9.92e-06	0.0761	CTCCGGGGACGGCGGTGGAGA
MLOC_38561	ERF	HvFRF16	1698	1718	-	13.6818	1e-05	0.0761	CCTCTCCTCTGGCGGCGGCGG
MLOC_73522	ERF	HvFRF16	939	959	-	13.5455	1e-05	0.0439	CTCGCCGTCGCCGCTCTCGGC
MLOC_24530	ERF	HvFRF17	1231	1245	+	13.7424	1e-05	0.086	GCCGCGCCGCCGCCA
MLOC_73522	ERF	HvFRF17	14	34	+	13.5303	1.01e-05	0.0439	GTCTCCACCGCCGTCCCCGGA
MLOC_12223	ERF	HvFRF16	770	784	-	13.8182	1.02e-05	0.0742	CGTGCCGGCGGCGGA
MLOC_8220	ERF	HvFRF10	228	237	+	11.8788	1.03e-05	0.274	CACCGACCTA
MLOC_77405	ERF	HvFRF17	1532	1552	+	12.9577	1.04e-05	0.043	GAGATCGGCAGTGGTGGCGGT
MLOC_80197	ERF	HvFRF16	1692	1719	+	13.8333	1.05e-05	0.0758	GAGGGGCCGCCGCCGCCAGAGGAGAGGA
MLOC_12223	ERF	HvFRF17	1538	1552	+	13.7727	1.05e-05	0.0742	GGCAGTGGTGGCGGT
MLOC_38561	ERF	HvFRF10	919	939	-	13.5303	1.09e-05	0.0761	GCGGCGAAGTCGCGGCGGCGG
MLOC_58641	ERF	HvFRF16	1698	1718	+	12.8143	1.09e-05	0.0474	CCGCCGCCGCCAGAGGAGAGG
MLOC_12223	ERF	HvFRF8	84	98	-	13.697	1.11e-05	0.0742	GAGAGCGGCGGCGGC
MLOC_55144	ERF	HvFRF17	69	88	+	13.2879	1.12e-05	0.042	CACGTCTTCCGCCGACGCCG
MLOC_69002	ERF	HvFRF10	1061	1075	+	13.7879	1.12e-05	0.0816	TCTCCGCTGCCGCCG
MLOC_77405	ERF	HvFRF16	1668	1688	+	12.8028	1.14e-05	0.0447	GGGGCCGCCGCCGGAGGAGGA
MLOC_38561	ERF	HvFRF16	1695	1715	-	13.4545	1.14e-05	0.0761	CTCCTCTGGCGGCGGCGGCCC
MLOC_63834	ERF	HvFRF6	169	188	+	13.7424	1.15e-05	0.0455	GGCGGCGGCCTCGGAGCCGT
MLOC_24530	ERF	HvFRF16	1695	1709	+	13.4697	1.16e-05	0.086	GGGCCGCCGCCGCCA
MLOC_69438	ERF	HvFRF21	875	889	-	13.4697	1.16e-05	0.0467	GCGACGCCACCGCCG
MLOC_73522	ERF	HvFRF17	100	120	+	13.2727	1.18e-05	0.0485	GACGTCGCCTCCACCGCCGAC
MLOC_69438	ERF	HvFRF3	1617	1631	+	13.4394	1.18e-05	0.0467	CAGTCTCCGCCGCGC
MLOC_55323	ERF	HvFRF7	674	692	-	13.2879	1.2e-05	0.0521	AAGAGATTACGGTGGTGGG
MLOC_24530	ERF	HvFRF6	223	237	-	13.3788	1.21e-05	0.086	TCTTCGCCGTCATCA
MLOC_62554	ERF	HvFRF17	110	124	-	13.9848	1.22e-05	0.31	TCCTGTCGGCGGTGG
MLOC_62554	ERF	HvFRF10	1030	1044	-	13.9848	1.22e-05	0.31	TCCTGTCGGCGGTGG
MLOC_63834	ERF	HvFRF17	1225	1244	-	13.6667	1.22e-05	0.0462	GGCGGCGGCGCGGCGGAGCG
MLOC_69987	ERF	HvFRF16	1698	1712	+	13.1364	1.22e-05	0.0381	CCGCCGCCGCCAGAG
MLOC_73522	ERF	HvFRF17	146	166	+	13.197	1.23e-05	0.0485	GCCGCCGCCGGTACGTCACCG
MLOC_55144	ERF	HvFRF10	1127	1146	-	13.1212	1.25e-05	0.0449	CATTGCAACCGCCGGCGCCG
MLOC_8220	ERF	HvFRF6	86	95	+	11.7677	1.25e-05	0.274	CGCCGCCCAC
MLOC_24530	ERF	HvFRF10	919	933	+	13.3182	1.25e-05	0.086	CCGCCGCCGCGACTT
MLOC_69002	ERF	HvFRF8	79	93	+	13.6515	1.26e-05	0.0844	TCACAGCCGCCGCCG
MLOC_58641	ERF	HvFRF10	539	559	-	12.5429	1.26e-05	0.052	CAGCCGCGGCCACCGCGGCCG
MLOC_3095	ERF	HvFRF17	110	124	-	13.9242	1.27e-05	0.245	TCCTGTCGGCGGTGG
MLOC_3095	ERF	HvFRF10	1030	1044	-	13.9242	1.27e-05	0.245	TCCTGTCGGCGGTGG
MLOC_24530	ERF	HvFRF17	1577	1591	-	13.2727	1.28e-05	0.086	AGGCCGCCGCCACAC
MLOC_12223	ERF	HvFRF17	140	154	-	13.4545	1.29e-05	0.0779	GGCGGCGGCGGAGAC
MLOC_73522	ERF	HvFRF5	880	900	+	13.0909	1.31e-05	0.0493	CCAGCCGCCGCCAGAGGCCAT
MLOC_80197	ERF	HvFRF16	1695	1722	+	13.3182	1.33e-05	0.0886	GGGCCGCCGCCGCCAGAGGAGAGGAGGT
MLOC_63834	ERF	HvFRF7	666	685	-	13.5455	1.34e-05	0.0483	TACGGTGGTGGGGGTGGGGG
MLOC_12223	ERF	HvFRF18	1305	1319	+	13.3939	1.34e-05	0.0779	AGTTGCAGCGGCGGG
MLOC_81350	ERF	HvFRF21	894	910	+	13.8788	1.35e-05	0.354	GCGTGTCGGTGATAATG
MLOC_63834	ERF	HvFRF17	1557	1576	+	13.5	1.39e-05	0.0483	GTCGGCCGCGGCGGCGAGTG
MLOC_69002	ERF	HvFRF10	927	941	+	13.5303	1.4e-05	0.0871	GCGACTTCGCCGCCG
MLOC_55323	ERF	HvFRF10	1046	1064	-	13.0152	1.41e-05	0.0566	GAGACGAGGCGGTGGGGGT
MLOC_55144	ERF	HvFRF17	1565	1584	-	12.9242	1.42e-05	0.049	CGCCACACCACTCGCCGCCG
MLOC_62554	ERF	HvFRF10	994	1008	-	13.8182	1.42e-05	0.31	CGGCGTCGGCAGAGA
MLOC_24530	ERF	HvFRF21	869	883	-	13.0455	1.43e-05	0.0892	CCACCGCCGACGCTT
MLOC_55323	ERF	HvFRF17	137	155	-	12.9848	1.43e-05	0.0566	CGGCGGCGGCGGAGACGAG
MLOC_69987	ERF	HvFRF17	1540	1554	-	12.8333	1.45e-05	0.0436	CAACCGCCACCACTG
MLOC_63834	ERF	HvFRF17	1581	1600	+	13.3636	1.54e-05	0.0514	GGCGGCGGCCTGGGCACTGG
MLOC_55144	ERF	HvFRF17	19	38	+	12.7879	1.55e-05	0.0515	CACCGCCGTCCCCGGAGCCG
MLOC_73522	ERF	HvFRF17	109	129	+	12.7727	1.56e-05	0.0527	TCCACCGCCGACAGGACACCC
MLOC_73522	ERF	HvFRF10	1029	1049	+	12.7727	1.56e-05	0.0527	TCCACCGCCGACAGGACACCC
MLOC_69002	ERF	HvFRF10	485	499	-	13.3788	1.57e-05	0.0916	CTGCCGGTGCCGGCC
MLOC_73522	ERF	HvFRF17	1233	1253	+	12.7576	1.58e-05	0.0527	CGCGCCGCCGCCATTCTGCAT
MLOC_69438	ERF	HvFRF17	1543	1557	-	12.9091	1.6e-05	0.0605	CCTCAACCGCCACCA
MLOC_55323	ERF	HvFRF17	73	91	-	12.7879	1.6e-05	0.0607	TCACGGCGTCGGCGGAAGA
MLOC_63834	ERF	HvFRF17	1566	1585	+	13.303	1.61e-05	0.0518	GGCGGCGAGTGGTGTGGCGG
MLOC_38561	ERF	HvFRF5	878	898	-	12.7576	1.66e-05	0.0907	GGCCTCTGGCGGCGGCTGGGA
MLOC_3095	ERF	HvFRF17	74	88	-	13.5152	1.66e-05	0.245	CGGCGTCGGCGGAAG
MLOC_69987	ERF	HvFRF21	869	883	-	12.5909	1.67e-05	0.0484	CCACCGCCGACGCTT
MLOC_62554	ERF	HvFRF21	869	883	+	13.6061	1.68e-05	0.31	AAGCGTCGGCGGTGG
MLOC_3095	ERF	HvFRF21	894	908	+	13.5	1.68e-05	0.245	GCGTGTCGGTGATAA
MLOC_69002	ERF	HvFRF6	226	240	-	13.2879	1.7e-05	0.0927	ACATCTTCGCCGTCA
MLOC_73522	ERF	HvFRF18	1302	1322	-	12.6212	1.7e-05	0.0548	AACCCCGCCGCTGCAACTCAC
MLOC_38561	ERF	HvFRF5	881	901	-	12.697	1.72e-05	0.0907	CATGGCCTCTGGCGGCGGCTG
MLOC_69438	ERF	HvFRF3	1789	1803	-	12.7424	1.76e-05	0.0638	GTGCTGCCGCCGCTT
MLOC_62554	ERF	HvFRF17	74	88	-	13.5455	1.77e-05	0.31	CGGCGTCGGCGGAAG
MLOC_75886	ERF	HvFRF7	12	21	+	13.5152	1.77e-05	0.417	GTGCCGACAA
MLOC_73522	ERF	HvFRF10	502	522	-	12.5455	1.78e-05	0.055	CGCAGCGCCGTCTCCACTCCT
MLOC_77405	ERF	HvFRF21	236	256	-	11.9577	1.79e-05	0.0566	TGATGATGATGCGGTGGAGAA
MLOC_55144	ERF	HvFRF17	22	41	+	12.5455	1.81e-05	0.0564	CGCCGTCCCCGGAGCCGACG
MLOC_77405	ERF	HvFRF11	617	637	-	11.9296	1.81e-05	0.0566	GTTGTTGGGATTGGTGGTGGG
MLOC_77405	ERF	HvFRF7	632	652	-	11.9296	1.81e-05	0.0566	GTTGTTGGGATTGGTGGTGGG
MLOC_77405	ERF	HvFRF19	661	681	-	11.9296	1.81e-05	0.0566	GTTGTTGGGATTGGTGGTGGG
MLOC_55144	ERF	HvFRF3	1609	1628	+	12.5303	1.82e-05	0.0564	TTCTGACGCAGTCTCCGCCG
MLOC_64636	ERF	HvFRF17	1	8	+	12.7636	1.83e-05	0.0808	CCGCCGCC
MLOC_64636	ERF	HvFRF8	85	92	+	12.7636	1.83e-05	0.0808	CCGCCGCC
MLOC_64636	ERF	HvFRF6	85	92	+	12.7636	1.83e-05	0.0808	CCGCCGCC
MLOC_64636	ERF	HvFRF17	144	151	+	12.7636	1.83e-05	0.0808	CCGCCGCC
MLOC_64636	ERF	HvFRF17	147	154	+	12.7636	1.83e-05	0.0808	CCGCCGCC
MLOC_64636	ERF	HvFRF6	169	176	-	12.7636	1.83e-05	0.0808	CCGCCGCC
MLOC_64636	ERF	HvFRF16	771	778	+	12.7636	1.83e-05	0.0808	CCGCCGCC
MLOC_64636	ERF	HvFRF21	809	816	-	12.7636	1.83e-05	0.0808	CCGCCGCC
MLOC_64636	ERF	HvFRF5	884	891	+	12.7636	1.83e-05	0.0808	CCGCCGCC
MLOC_64636	ERF	HvFRF10	919	926	+	12.7636	1.83e-05	0.0808	CCGCCGCC
MLOC_64636	ERF	HvFRF17	1237	1244	+	12.7636	1.83e-05	0.0808	CCGCCGCC
MLOC_64636	ERF	HvFRF16	1383	1390	+	12.7636	1.83e-05	0.0808	CCGCCGCC
MLOC_64636	ERF	HvFRF17	1581	1588	-	12.7636	1.83e-05	0.0808	CCGCCGCC
MLOC_64636	ERF	HvFRF16	1672	1679	+	12.7636	1.83e-05	0.0808	CCGCCGCC
MLOC_64636	ERF	HvFRF16	1698	1705	+	12.7636	1.83e-05	0.0808	CCGCCGCC
MLOC_64636	ERF	HvFRF16	1701	1708	+	12.7636	1.83e-05	0.0808	CCGCCGCC
MLOC_73522	ERF	HvFRF10	1020	1040	+	12.4848	1.84e-05	0.055	CACGTCGCCTCCACCGCCGAC
MLOC_55323	ERF	HvFRF16	767	785	-	12.5303	1.86e-05	0.0674	ACGTGCCGGCGGCGGATGG
MLOC_38561	ERF	HvFRF16	768	788	-	12.5455	1.86e-05	0.0907	GCAACGTGCCGGCGGCGGATG
MLOC_58641	ERF	HvFRF17	104	124	+	11.7714	1.86e-05	0.061	TCGCCTCCACCGCCGACAGGA
MLOC_58641	ERF	HvFRF10	1024	1044	+	11.7714	1.86e-05	0.061	TCGCCTCCACCGCCGACAGGA
MLOC_58641	ERF	HvFRF17	101	121	+	11.7429	1.89e-05	0.061	ACGTCGCCTCCACCGCCGACA
MLOC_58641	ERF	HvFRF10	1021	1041	+	11.7429	1.89e-05	0.061	ACGTCGCCTCCACCGCCGACA
MLOC_75886	ERF	HvFRF17	113	122	+	13.3737	1.9e-05	0.417	CCGCCGACAG
MLOC_75886	ERF	HvFRF10	1033	1042	+	13.3737	1.9e-05	0.417	CCGCCGACAG
MLOC_58641	ERF	HvFRF17	107	127	+	11.7286	1.9e-05	0.061	CCTCCACCGCCGACAGGACAC
MLOC_58641	ERF	HvFRF10	1027	1047	+	11.7286	1.9e-05	0.061	CCTCCACCGCCGACAGGACAC
MLOC_73522	ERF	HvFRF3	1619	1639	+	12.4091	1.92e-05	0.0555	GTCTCCGCCGCGCCAGACGTG
MLOC_80197	ERF	HvFRF10	1072	1099	+	12.4091	1.92e-05	0.116	GCCGGTACGCCGCCGCACATGTCTCCAT
MLOC_77405	ERF	HvFRF17	143	163	-	11.8169	1.92e-05	0.0566	TGACGTACCGGCGGCGGCGGA
MLOC_66843	ERF	HvFRF5	885	892	+	14.8211	1.95e-05	0.0716	CGCCGCCA
MLOC_66843	ERF	HvFRF17	1238	1245	+	14.8211	1.95e-05	0.0716	CGCCGCCA
MLOC_66843	ERF	HvFRF17	1580	1587	-	14.8211	1.95e-05	0.0716	CGCCGCCA
MLOC_66843	ERF	HvFRF16	1702	1709	+	14.8211	1.95e-05	0.0716	CGCCGCCA
MLOC_69002	ERF	HvFRF17	203	217	+	13.1061	1.96e-05	0.101	GCTTCGACGCCGGCG
MLOC_77405	ERF	HvFRF11	1267	1287	-	11.7746	1.97e-05	0.0566	GATGGTGGTGCTTTAGGTGGA
MLOC_77405	ERF	HvFRF7	1285	1305	-	11.7746	1.97e-05	0.0566	GATGGTGGTGCTTTAGGTGGA
MLOC_55144	ERF	HvFRF10	1059	1078	+	12.4091	1.97e-05	0.0564	CGTCTCCGCTGCCGCCGGTA
MLOC_58641	ERF	HvFRF17	1568	1588	-	11.6571	1.97e-05	0.061	CCGCCGCCACACCACTCGCCG
MLOC_73522	ERF	HvFRF21	236	256	+	12.3485	1.98e-05	0.0555	TTCTCCACCGCATCATCATCA
MLOC_77405	ERF	HvFRF17	20	40	-	11.7606	1.98e-05	0.0566	GTCGGCTCCGGGGACGGCGGT
MLOC_55144	ERF	HvFRF16	1562	1581	-	12.3939	1.99e-05	0.0564	CCTCTCCTCCTCCGACGGCG
MLOC_38561	ERF	HvFRF21	866	886	+	12.4091	1.99e-05	0.0907	ATGAAGCGTCGGCGGTGGCGT
MLOC_80197	ERF	HvFRF17	135	162	+	12.303	2e-05	0.116	GTCTCGTCTCCGCCGCCGCCGGTACGTC
MLOC_77405	ERF	HvFRF10	1122	1142	+	11.7183	2.02e-05	0.0566	CGCTTCGGCGCCGGCGGTTGC
MLOC_55144	ERF	HvFRF17	162	181	+	12.3636	2.03e-05	0.0564	CACCGCACACGTCTCCACCG
MLOC_73522	ERF	HvFRF3	1835	1855	-	12.2727	2.06e-05	0.056	TTTTCCGCCGGCACTGACGTT
MLOC_38561	ERF	HvFRF10	930	950	-	12.3333	2.07e-05	0.0907	GAGACGTCGCGGCGGCGAAGT
MLOC_55144	ERF	HvFRF10	548	567	-	12.3182	2.08e-05	0.0564	CGCCTTCTCAGCCGCGGCCA
MLOC_38561	ERF	HvFRF10	950	970	-	12.3182	2.09e-05	0.0907	CGGCGCCGGGGACGGCGGTGG
MLOC_81350	ERF	HvFRF22	1925	1941	-	12.803	2.1e-05	0.354	TTTGGTCGGTGTTTGCC
MLOC_81350	ERF	HvFRF2	1925	1941	-	12.803	2.1e-05	0.354	TTTGGTCGGTGTTTGCC
MLOC_38561	ERF	HvFRF3	1748	1768	+	12.303	2.11e-05	0.0907	TCACGGAAGCAGCGGCGACGG
MLOC_69987	ERF	HvFRF16	1673	1687	-	12.1667	2.11e-05	0.0593	CCTCCTCCGGCGGCG
MLOC_55323	ERF	HvFRF17	1556	1574	+	12.303	2.11e-05	0.0735	GGTCGGCCGCGGCGGCGAG
MLOC_12223	ERF	HvFRF17	109	123	-	12.6061	2.14e-05	0.11	CCTGTCGGCGGTGGA
MLOC_12223	ERF	HvFRF10	1029	1043	-	12.6061	2.14e-05	0.11	CCTGTCGGCGGTGGA
MLOC_58641	ERF	HvFRF10	501	521	-	11.4714	2.16e-05	0.0645	GCAGCGCCGTCTCCACTCCTC
MLOC_69438	ERF	HvFRF7	672	686	+	12.3636	2.16e-05	0.0754	CCCCCACCACCGTAA
MLOC_38561	ERF	HvFRF21	863	883	+	12.2273	2.19e-05	0.0907	GCGATGAAGCGTCGGCGGTGG
MLOC_77405	ERF	HvFRF17	1566	1586	+	11.5352	2.22e-05	0.0602	GGCGGCGAGTGGTGTGGCGGC
MLOC_55144	ERF	HvFRF17	96	115	+	12.197	2.25e-05	0.0589	AGCAGACGTCGCCTCCACCG
MLOC_69438	ERF	HvFRF17	1580	1594	-	12.2727	2.27e-05	0.076	CCCAGGCCGCCGCCA
MLOC_73522	ERF	HvFRF10	929	949	+	12.0909	2.28e-05	0.0599	GACTTCGCCGCCGCGACGTCT
MLOC_55144	ERF	HvFRF10	479	498	+	12.1515	2.31e-05	0.0589	CGGCGCGGCCGGCACCGGCA
MLOC_55323	ERF	HvFRF3	1783	1801	+	12.1212	2.33e-05	0.0765	TCATGGAAGCGGCGGCAGC
MLOC_80197	ERF	HvFRF17	1231	1258	+	11.8333	2.36e-05	0.123	GCCGCGCCGCCGCCATTCTGCATCGAGC
MLOC_73522	ERF	HvFRF17	1557	1577	-	12.0152	2.37e-05	0.06	CCACTCGCCGCCGCGGCCGAC
MLOC_55323	ERF	HvFRF20	1456	1474	-	12.0909	2.37e-05	0.0765	TGGGATTGGTGGTGGTGGG
MLOC_55144	ERF	HvFRF21	869	888	-	12.1061	2.38e-05	0.0589	CGACGCCACCGCCGACGCTT
MLOC_69002	ERF	HvFRF17	170	184	+	12.8333	2.41e-05	0.108	ACGTCTCCACCGGCG
MLOC_80197	ERF	HvFRF5	229	256	-	11.7727	2.41e-05	0.123	CTCCATGAGCCGCCTTCCTTCAGGTTGC
MLOC_63834	ERF	HvFRF10	1055	1074	-	12.7273	2.42e-05	0.0753	GGCGGCAGCGGAGACGAGGC
MLOC_58641	ERF	HvFRF10	1047	1067	+	11.2286	2.43e-05	0.0665	CCCCCACCGCCTCGTCTCCGC
MLOC_69002	ERF	HvFRF16	765	779	+	12.8182	2.44e-05	0.108	CACCATCCGCCGCCG
MLOC_69002	ERF	HvFRF16	917	931	+	12.803	2.46e-05	0.108	GGGCGTCCGCCGGCT
MLOC_12223	ERF	HvFRF3	1752	1766	+	12.3636	2.46e-05	0.11	GGAAGCAGCGGCGAC
MLOC_38561	ERF	HvFRF10	1078	1098	-	11.9848	2.47e-05	0.0925	TGGAGACATGTGCGGCGGCGT
MLOC_77405	ERF	HvFRF17	160	180	-	11.3099	2.49e-05	0.0623	GGTGGAGACGTGTGCGGTGAC
MLOC_73522	ERF	HvFRF17	106	126	+	11.8939	2.53e-05	0.06	GCCTCCACCGCCGACAGGACA
MLOC_73522	ERF	HvFRF10	1026	1046	+	11.8939	2.53e-05	0.06	GCCTCCACCGCCGACAGGACA
MLOC_77405	ERF	HvFRF10	540	560	+	11.2676	2.55e-05	0.0623	GGCCGCGGTGGCCGCGGCTGA
MLOC_63834	ERF	HvFRF10	478	497	-	12.6515	2.55e-05	0.0765	GCCGGTGCCGGCCGCGCCGC
MLOC_12223	ERF	HvFRF21	239	253	-	12.303	2.55e-05	0.11	TGATGATGCGGTGGA
MLOC_69438	ERF	HvFRF21	234	248	+	12.0303	2.58e-05	0.0834	TCTTCTCCACCGCAT
MLOC_77405	ERF	HvFRF10	1060	1080	-	11.2394	2.59e-05	0.0623	CGTACCGGCGGCAGCGGAGAC
MLOC_73522	ERF	HvFRF17	1572	1592	-	11.8485	2.59e-05	0.06	CAGGCCGCCGCCACACCACTC
MLOC_38561	ERF	HvFRF17	107	127	-	11.8788	2.61e-05	0.0925	GTGTCCTGTCGGCGGTGGAGG
MLOC_38561	ERF	HvFRF10	1027	1047	-	11.8788	2.61e-05	0.0925	GTGTCCTGTCGGCGGTGGAGG
MLOC_55323	ERF	HvFRF10	1077	1095	-	11.9091	2.62e-05	0.0778	AGACATGTGCGGCGGCGTA
MLOC_55323	ERF	HvFRF3	1837	1855	+	11.9091	2.62e-05	0.0778	CGTCAGTGCCGGCGGAAAA
MLOC_55144	ERF	HvFRF17	1580	1599	-	11.9394	2.64e-05	0.0635	CAGTGCCCAGGCCGCCGCCA
MLOC_77405	ERF	HvFRF17	14	34	-	11.1972	2.64e-05	0.0623	TCCGGGGACGGCGGTGGAGAC
MLOC_58641	ERF	HvFRF7	675	695	+	11.0429	2.66e-05	0.0665	CCACCACCGTAATCTCTTCTC
MLOC_77405	ERF	HvFRF20	1456	1476	-	11.1831	2.66e-05	0.0623	TGTGGGATTGGTGGTGGTGGG
MLOC_73522	ERF	HvFRF17	1538	1558	-	11.7879	2.67e-05	0.06	ACCTCAACCGCCACCACTGCC
MLOC_12223	ERF	HvFRF5	883	897	-	12.2121	2.68e-05	0.11	GCCTCTGGCGGCGGC
MLOC_73522	ERF	HvFRF16	770	790	+	11.7727	2.7e-05	0.06	TCCGCCGCCGGCACGTTGCTG
MLOC_69987	ERF	HvFRF10	1064	1078	+	11.7121	2.7e-05	0.0735	CCGCTGCCGCCGGTA
MLOC_58641	ERF	HvFRF17	12	32	+	11	2.71e-05	0.0665	ACGTCTCCACCGCCGTCCCCG
MLOC_58641	ERF	HvFRF10	944	964	+	11	2.71e-05	0.0665	ACGTCTCCACCGCCGTCCCCG
MLOC_24530	ERF	HvFRF8	79	93	+	11.6364	2.72e-05	0.126	TCACAGCCGCCGCCG
MLOC_69002	ERF	HvFRF6	168	182	-	12.6667	2.72e-05	0.109	CCGAGGCCGCCGCCC
MLOC_38561	ERF	HvFRF17	1553	1573	+	11.7879	2.73e-05	0.0925	TGAGGTCGGCCGCGGCGGCGA
MLOC_12223	ERF	HvFRF10	1060	1074	-	12.1818	2.73e-05	0.11	GGCGGCAGCGGAGAC
MLOC_58641	ERF	HvFRF6	57	77	+	10.9857	2.73e-05	0.0665	CCACCACCATAGCCACGTCCA
MLOC_69002	ERF	HvFRF3	1843	1857	-	12.6515	2.75e-05	0.109	GGTTTTCCGCCGGCA
MLOC_73522	ERF	HvFRF17	137	157	+	11.7273	2.76e-05	0.06	CTCGTCTCCGCCGCCGCCGGT
MLOC_55144	ERF	HvFRF16	1673	1692	-	11.8636	2.77e-05	0.0639	CCTCTCCTCCTCCGGCGGCG
MLOC_38561	ERF	HvFRF10	542	562	+	11.7576	2.77e-05	0.0925	CCGCGGTGGCCGCGGCTGAGA
MLOC_24530	ERF	HvFRF20	1323	1337	-	11.5909	2.77e-05	0.126	TGTGCGCCGCCGCTC
MLOC_12223	ERF	HvFRF10	248	262	-	12.1515	2.77e-05	0.11	TATAGAGGTGGTGGC
MLOC_58641	ERF	HvFRF3	1629	1649	-	10.9429	2.79e-05	0.0665	ACGGCGCCTCCACGTCTGGCG
MLOC_80197	ERF	HvFRF10	1058	1085	+	11.303	2.81e-05	0.135	TCGTCTCCGCTGCCGCCGGTACGCCGCC
MLOC_58641	ERF	HvFRF10	1078	1098	+	10.9143	2.82e-05	0.0665	ACGCCGCCGCACATGTCTCCA
MLOC_69438	ERF	HvFRF10	551	565	-	11.8485	2.84e-05	0.0853	CCTTCTCAGCCGCGG
MLOC_55144	ERF	HvFRF17	66	85	+	11.8182	2.84e-05	0.0639	CGGCACGTCTTCCGCCGACG
MLOC_64636	ERF	HvFRF1	643	650	-	12.4455	2.86e-05	0.0808	GCGCCGCA
MLOC_66843	ERF	HvFRF14	272	279	+	14.0163	2.86e-05	0.0716	CGGCGCCG
MLOC_66843	ERF	HvFRF14	272	279	-	14.0163	2.86e-05	0.0716	CGGCGCCG
MLOC_66843	ERF	HvFRF22	323	330	+	14.0163	2.86e-05	0.0716	CGGCGCCG
MLOC_66843	ERF	HvFRF22	323	330	-	14.0163	2.86e-05	0.0716	CGGCGCCG
MLOC_66843	ERF	HvFRF9	339	346	+	14.0163	2.86e-05	0.0716	CGGCGCCG
MLOC_66843	ERF	HvFRF2	344	351	+	14.0163	2.86e-05	0.0716	CGGCGCCG
MLOC_66843	ERF	HvFRF9	339	346	-	14.0163	2.86e-05	0.0716	CGGCGCCG
MLOC_66843	ERF	HvFRF2	344	351	-	14.0163	2.86e-05	0.0716	CGGCGCCG
MLOC_66843	ERF	HvFRF7	451	458	+	14.0163	2.86e-05	0.0716	CGGCGCCG
MLOC_66843	ERF	HvFRF7	451	458	-	14.0163	2.86e-05	0.0716	CGGCGCCG
MLOC_66843	ERF	HvFRF19	487	494	+	14.0163	2.86e-05	0.0716	CGGCGCCG
MLOC_66843	ERF	HvFRF19	487	494	-	14.0163	2.86e-05	0.0716	CGGCGCCG
MLOC_66843	ERF	HvFRF10	963	970	+	14.0163	2.86e-05	0.0716	CGGCGCCG
MLOC_66843	ERF	HvFRF10	963	970	-	14.0163	2.86e-05	0.0716	CGGCGCCG
MLOC_66843	ERF	HvFRF10	1127	1134	+	14.0163	2.86e-05	0.0716	CGGCGCCG
MLOC_66843	ERF	HvFRF10	1127	1134	-	14.0163	2.86e-05	0.0716	CGGCGCCG
MLOC_64636	ERF	HvFRF14	274	281	+	12.4455	2.86e-05	0.0808	GCGCCGCA
MLOC_64636	ERF	HvFRF22	325	332	+	12.4455	2.86e-05	0.0808	GCGCCGCA
MLOC_64636	ERF	HvFRF9	341	348	+	12.4455	2.86e-05	0.0808	GCGCCGCA
MLOC_64636	ERF	HvFRF2	346	353	+	12.4455	2.86e-05	0.0808	GCGCCGCA
MLOC_64636	ERF	HvFRF11	441	448	+	12.4455	2.86e-05	0.0808	GCGCCGCA
MLOC_64636	ERF	HvFRF7	453	460	+	12.4455	2.86e-05	0.0808	GCGCCGCA
MLOC_64636	ERF	HvFRF19	489	496	+	12.4455	2.86e-05	0.0808	GCGCCGCA
MLOC_64636	ERF	HvFRF17	1476	1483	+	12.4455	2.86e-05	0.0808	GCGCCGCA
MLOC_38561	ERF	HvFRF17	1231	1251	-	11.6818	2.87e-05	0.0925	GCAGAATGGCGGCGGCGCGGC
MLOC_58641	ERF	HvFRF17	1409	1429	-	10.8714	2.88e-05	0.0665	CCGCTGCCGCACCACTCGCCG
MLOC_69438	ERF	HvFRF17	77	91	+	11.8182	2.89e-05	0.0853	CCGCCGACGCCGTGA
MLOC_63834	ERF	HvFRF21	599	618	+	12.4545	2.91e-05	0.0842	GTCGGCGATGAGTCCGCCGG
MLOC_58641	ERF	HvFRF3	1783	1803	-	10.8429	2.92e-05	0.0665	GTGCTGCCGCCGCTTCCATGA
MLOC_55144	ERF	HvFRF10	539	558	-	11.7727	2.92e-05	0.0639	AGCCGCGGCCACCGCGGCCG
MLOC_69438	ERF	HvFRF10	1064	1078	+	11.7879	2.94e-05	0.0853	CCGCTGCCGCCGGTA
MLOC_8220	ERF	HvFRF21	1159	1168	-	11.3535	2.94e-05	0.515	CACCGACCCA
MLOC_55144	ERF	HvFRF21	822	841	-	11.7576	2.95e-05	0.0639	CTTCACCAACATCTTCGTCA
MLOC_69002	ERF	HvFRF10	1064	1078	+	12.5455	2.97e-05	0.113	CCGCTGCCGCCGGTA
MLOC_73522	ERF	HvFRF16	767	787	+	11.5758	2.99e-05	0.0633	CCATCCGCCGCCGGCACGTTG
MLOC_63834	ERF	HvFRF17	211	230	+	12.4091	3e-05	0.0842	GCCGGCGGTTGCAGTGACCG
MLOC_24530	ERF	HvFRF3	1640	1654	+	11.3939	3.02e-05	0.126	GAGGCGCCGTCGTTG
MLOC_24530	ERF	HvFRF17	107	121	+	11.3636	3.06e-05	0.126	CCTCCACCGCCGACA
MLOC_24530	ERF	HvFRF10	1027	1041	+	11.3636	3.06e-05	0.126	CCTCCACCGCCGACA
MLOC_77405	ERF	HvFRF21	239	259	-	10.9014	3.06e-05	0.068	AGTTGATGATGATGCGGTGGA
MLOC_55323	ERF	HvFRF5	880	898	-	11.6212	3.06e-05	0.0778	GGCCTCTGGCGGCGGCTGG
MLOC_12223	ERF	HvFRF17	1560	1574	+	11.9697	3.07e-05	0.116	GGCCGCGGCGGCGAG
MLOC_62554	ERF	HvFRF7	9	23	-	12.7879	3.1e-05	0.434	GGTTGTCGGCACCAA
MLOC_63834	ERF	HvFRF8	73	92	-	12.3485	3.12e-05	0.0848	GGCGGCGGCTGTGAGCAGTA
MLOC_77405	ERF	HvFRF21	870	890	+	10.8592	3.13e-05	0.068	AGCGTCGGCGGTGGCGTCGCA
MLOC_55323	ERF	HvFRF10	545	563	+	11.5758	3.14e-05	0.0778	CGGTGGCCGCGGCTGAGAA
MLOC_58641	ERF	HvFRF16	765	785	+	10.6857	3.14e-05	0.0694	CACCATCCGCCGCCGGCACGT
MLOC_73522	ERF	HvFRF10	1122	1142	-	11.4545	3.18e-05	0.0658	GCAACCGCCGGCGCCGAAGCG
MLOC_69438	ERF	HvFRF16	944	958	-	11.6212	3.2e-05	0.0899	TCGCCGTCGCCGCTC
MLOC_58641	ERF	HvFRF5	881	901	+	10.6429	3.21e-05	0.0694	CAGCCGCCGCCAGAGGCCATG
MLOC_63834	ERF	HvFRF10	921	940	-	12.303	3.21e-05	0.0848	GGCGGCGAAGTCGCGGCGGC
MLOC_69002	ERF	HvFRF16	1676	1690	-	12.4242	3.24e-05	0.117	TCTCCTCCTCCGGCG
MLOC_3095	ERF	HvFRF19	1877	1891	+	12.3939	3.29e-05	0.32	GACTGTCGGTGCATC
MLOC_3095	ERF	HvFRF11	1889	1903	+	12.3939	3.29e-05	0.32	GACTGTCGGTGCATC
MLOC_3095	ERF	HvFRF7	1889	1903	+	12.3939	3.29e-05	0.32	GACTGTCGGTGCATC
MLOC_24530	ERF	HvFRF10	507	521	-	11.1818	3.31e-05	0.126	GCAGCGCCGTCTCCA
MLOC_55323	ERF	HvFRF8	78	96	-	11.4697	3.32e-05	0.0778	GAGCGGCGGCGGCTGTGAG
MLOC_69002	ERF	HvFRF10	478	492	+	12.3788	3.35e-05	0.117	GCGGCGCGGCCGGCA
MLOC_55144	ERF	HvFRF17	13	32	+	11.5455	3.36e-05	0.0682	CGTCTCCACCGCCGTCCCCG
MLOC_55144	ERF	HvFRF10	945	964	+	11.5455	3.36e-05	0.0682	CGTCTCCACCGCCGTCCCCG
MLOC_58641	ERF	HvFRF17	1381	1401	-	10.5429	3.36e-05	0.071	CCTCAACCACCACTGTTGTCG
MLOC_55323	ERF	HvFRF17	126	144	-	11.4394	3.37e-05	0.0778	GAGACGAGACGGTGGGGGT
MLOC_55323	ERF	HvFRF16	770	788	-	11.4394	3.37e-05	0.0778	GCAACGTGCCGGCGGCGGA
MLOC_55323	ERF	HvFRF10	932	950	-	11.4394	3.37e-05	0.0778	GAGACGTCGCGGCGGCGAA
MLOC_63834	ERF	HvFRF16	759	778	-	12.2273	3.38e-05	0.0864	GGCGGCGGATGGTGGTCTGC
MLOC_69438	ERF	HvFRF10	997	1011	+	11.5152	3.38e-05	0.0917	CTGCCGACGCCGCGA
MLOC_55144	ERF	HvFRF10	542	561	-	11.5303	3.39e-05	0.0682	CTCAGCCGCGGCCACCGCGG
MLOC_55323	ERF	HvFRF14	417	435	-	11.4242	3.4e-05	0.0778	TGGGATTGGTGGTGGGGGA
MLOC_55323	ERF	HvFRF22	466	484	-	11.4242	3.4e-05	0.0778	TGGGATTGGTGGTGGGGGA
MLOC_55323	ERF	HvFRF9	478	496	-	11.4242	3.4e-05	0.0778	TGGGATTGGTGGTGGGGGA
MLOC_77405	ERF	HvFRF21	820	840	+	10.6761	3.42e-05	0.068	GTTGACGAAGATGTTGGTGAA
MLOC_69987	ERF	HvFRF7	672	686	+	11.2576	3.44e-05	0.084	CCCCCACCACCGTAA
MLOC_69987	ERF	HvFRF21	872	886	-	11.2576	3.44e-05	0.084	ACGCCACCGCCGACG
MLOC_69987	ERF	HvFRF17	1580	1594	-	11.2576	3.44e-05	0.084	CCCAGGCCGCCGCCA
MLOC_69987	ERF	HvFRF17	210	224	-	11.2424	3.47e-05	0.084	CTGCAACCGCCGGCG
MLOC_62554	ERF	HvFRF21	595	609	+	12.6061	3.48e-05	0.434	TGCCGTCGGCGATGA
MLOC_24530	ERF	HvFRF5	878	892	+	11.0455	3.5e-05	0.126	TCCCAGCCGCCGCCA
MLOC_77405	ERF	HvFRF16	1506	1526	+	10.6197	3.52e-05	0.068	GGGGCCGCTGCCGGAGGAGAA
MLOC_38561	ERF	HvFRF3	1640	1660	-	11.2576	3.52e-05	0.104	ATGTCGCAACGACGGCGCCTC
MLOC_73522	ERF	HvFRF16	1694	1714	+	11.2576	3.52e-05	0.0711	GGGGCCGCCGCCGCCAGAGGA
MLOC_55323	ERF	HvFRF17	1233	1251	-	11.3485	3.54e-05	0.0782	GCAGAATGGCGGCGGCGCG
MLOC_69438	ERF	HvFRF21	1284	1298	-	11.4242	3.54e-05	0.0917	CATCCGCGGCCGCAT
MLOC_63834	ERF	HvFRF16	1689	1708	-	12.1515	3.54e-05	0.0881	GGCGGCGGCGGCCCCTCCTC
MLOC_69002	ERF	HvFRF16	1377	1391	+	12.2879	3.56e-05	0.12	GGGCGGCCGCCGCCG
MLOC_58641	ERF	HvFRF21	237	257	+	10.4143	3.56e-05	0.0717	TCTCCACCGCATCATCATCAA
MLOC_58641	ERF	HvFRF7	672	692	+	10.4	3.59e-05	0.0717	CCCCCACCACCGTAATCTCTT
MLOC_55323	ERF	HvFRF10	504	522	+	11.3182	3.59e-05	0.0782	GAGTGGAGACGGCGCTGCG
MLOC_38561	ERF	HvFRF17	18	38	-	11.2121	3.6e-05	0.104	CGGCTCCGGGGACGGCGGTGG
MLOC_38561	ERF	HvFRF17	1556	1576	+	11.2121	3.6e-05	0.104	GGTCGGCCGCGGCGGCGAGTG
MLOC_24530	ERF	HvFRF21	805	819	-	10.9697	3.61e-05	0.126	ACGCCGCCGCCCCTC
MLOC_80197	ERF	HvFRF10	910	937	+	10.4545	3.62e-05	0.158	CGCCCGACTCCGCCGCCGCGACTTCGCC
MLOC_80197	ERF	HvFRF17	1228	1255	+	10.4242	3.65e-05	0.158	TCCGCCGCGCCGCCGCCATTCTGCATCG
MLOC_77405	ERF	HvFRF17	1538	1558	+	10.5352	3.67e-05	0.068	GGCAGTGGTGGCGGTTGAGGT
MLOC_12223	ERF	HvFRF17	1535	1549	+	11.6212	3.7e-05	0.134	ATCGGCAGTGGTGGC
MLOC_58641	ERF	HvFRF3	1617	1637	+	10.3143	3.73e-05	0.0717	CAGTCTCCGCCGCGCCAGACG
[truncated: 2,183 more rows]

## Sheet: Table S3
Table S3. The regulatory relationship between miRNA and HvFRFs
miRNA_Acc.	Target_Acc.	Expectation	UPE$	miRNA_start	miRNA_end	Target_start	Target_end	miRNA_aligned_fragment	alignment	Target_aligned_fragment	Inhibition	Multiplicity
hvu-miR5052	HvFRF16	4.5	-1	1	21	448	468	ACCGGCUGGACGGUAGGCAUA	: :::.: .:::: ::..:::	UUUGCUUCUCGUCAAGUUGGU	Cleavage	1
hvu-miR6199	HvFRF8	5	-1	1	23	425	446	CCACAGAAUUCUCACAGUGAUGG	::::: ::: :::::::: :::	ACAUCA-UGUCAGAAUUCUAUGG	Cleavage	1
hvu-miR6200	HvFRF10	5	-1	1	21	542	564	UUUGGCCAACUAGAU--CUAUGA	.:::: ::: :::::::.:.:	CUAUAGGAAUCAAGUUGGCUAGA	Cleavage	1
